# Supplementary material for: Repurposing strategies on pyridazinone-based series by pharmacophore- and structure-driven screening
Source: PubMed Central journal article supplement (PMC7241479; doi:10.1080/14756366.2020.1760261), 2020-05-05
Supplement: IENZ_A_1760261_SM3337.pdf [file IENZ_A_1760261_SM3337.pdf]

Supporting Information

for

**Repurposing strategies on pyridazinone-based series by pharmacophore- and structure-driven screening**

G. Floresta,<sup>a</sup> L. Crocetti,<sup>b</sup> M. P. Giovannoni,<sup>b</sup> P. Biagini,<sup>b</sup> and A. Cilibrizzi<sup>a,\*</sup>

*<sup>a</sup>Institute of Pharmaceutical Science, King's College London, Stamford Street, London SE1 9NH, UK*

*<sup>b</sup>NEUROFARBA, Pharmaceutical and Nutraceutical Section, University of Florence, Via Ugo Schiff, 6, 50019 Sesto Fiorentino (Fi), Italy*

**Content:**

|                                               |    |
|-----------------------------------------------|----|
| 1. Chemistry ( <b>Scheme S1-S12</b> )         | 2  |
| 2. Experimental Section                       | 11 |
| 3. Experimental Details - Molecular modelling | 29 |
| 4. References                                 | 81 |

## 1. Chemistry

Analogues **1a,b** and **2a,b** were prepared from the 4,5-dichloro-3(2*H*)-pyridazinone **22**, commercially available (**Scheme S1**). *N*-2-benzyl derivatives **23a,b** were synthesised by treatment with 3- or 4-methoxybenzyl bromide in the presence of potassium carbonate and tetrabutylammonium bromide. The compounds **1a,b** were then obtained in two steps. The first reaction was a nucleophilic substitution leading to the selective displacement of the chlorine at C-5 of the pyridazinone ring of **23a,b**, using sodium methoxide in anhydrous methanol. The second step was the coupling of **24a,b** with 4-butoxyphenylboronic acid using tetrakis(triphenylphosphine)-palladium(0) catalyst under standard Suzuki conditions, to give the final 4-arylated-5-methoxy-pyridazinones **1a,b** in good yields. To synthesise analogues **2a,b**, it was not possible to obtain selective monoarylation through classical Suzuki reaction. Differently, a selective coupling of 4-butoxyphenylboronic acid on C-5 of the pyridazinone ring was achieved using *trans*-dichlorobis-(triethylphosphine)palladium (II) as catalyst and in the presence of 2M Na<sub>2</sub>CO<sub>3</sub>.

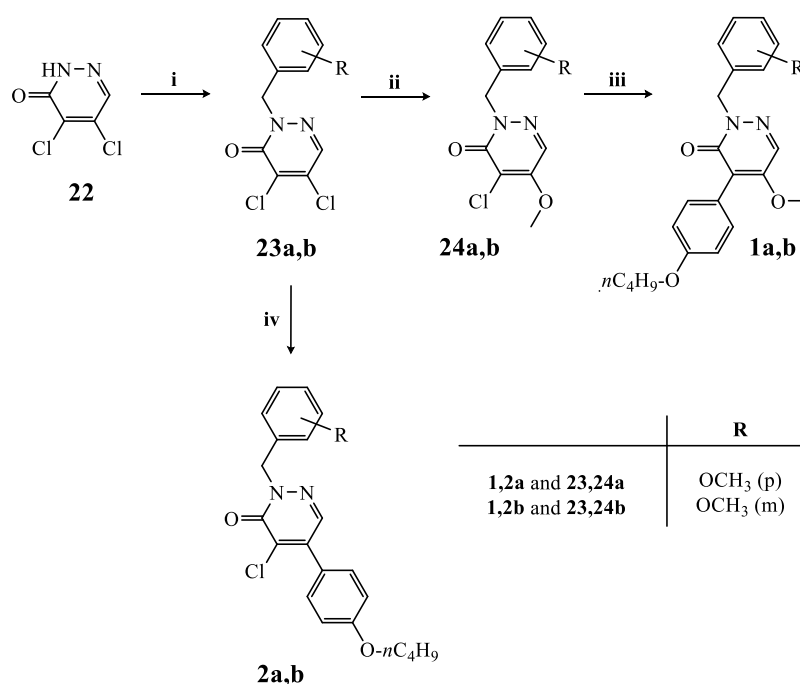

**Scheme S1. Reagents and conditions:** **i**) 3 or 4-methoxybenzyl chloride (1.5 equiv), K<sub>2</sub>CO<sub>3</sub> (2 equiv), Bu<sub>4</sub>NBr (0.1 equiv), anhydrous CH<sub>3</sub>CN, 5 h, reflux; **ii**) Na<sup>0</sup> (2 equiv), anhydrous CH<sub>3</sub>OH, 1 h, rt; **iii**) 4-butoxyphenylboronic acid (3 equiv), Pd(PPh<sub>3</sub>)<sub>4</sub> (0.03 equiv), 2M Na<sub>2</sub>CO<sub>3</sub> in H<sub>2</sub>O (1 equiv), toluene, 8 h, reflux; **iv**) 4-butoxyphenylboronic acid (0.5 equiv), PdCl<sub>2</sub>[(C<sub>2</sub>H<sub>5</sub>)<sub>3</sub>P]<sub>2</sub> (0.1 equiv), 2M Na<sub>2</sub>CO<sub>3</sub> in H<sub>2</sub>O (1 equiv), DMF, 6-12 h, rt.

In **Scheme S2** is depicted the synthesis of compounds **3a,b**. The pyridazinone scaffold **25** was converted into **26** through an alkylation with ethyl bromoacetate in standard condition. Intermediate

**26** was subjected to alkaline hydrolysis with NaOH (**27**). The following amide bond formation on **27** using ethyl chloroformate and 4-bromoaniline through the mixed-anhydride method afforded compounds **3a,b**.

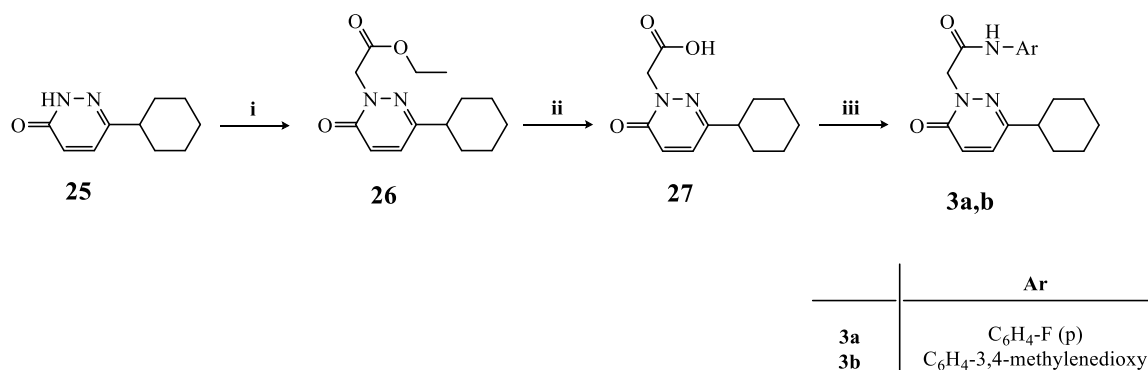

**Scheme S2. Reagents and conditions:** **i**) ethyl bromoacetate (1.5 equiv), K<sub>2</sub>CO<sub>3</sub> (2 equiv), anhydrous CH<sub>3</sub>CN, 3 h, reflux; **ii**) NaOH 6N, 2 h, 80 °C; **iii**) ethyl chloroformate (1.1 equiv), Et<sub>3</sub>N (3.5 equiv), suitable aniline (2 equiv), anhydrous THF, 12 h, -5 °C → rt.

The pyridazinone analogues **4a,b**, **5a,b** and **6a,b** (**Scheme S3**) were synthesised starting from the isoxazolo[3,4-d]pyridazinone **28**<sup>23</sup>, which was firstly alkylated with the appropriate benzyl halide to give intermediates **29a,b**<sup>18,24</sup>. Oxidative ring cleavage of the intermediates **29a,b** with CAN in a mixture of nitric and acetic acids afforded 5-acetyl-4-nitropyridazinones **4a,b**<sup>24</sup> in moderate yields, through the selective opening of the five-member ring. Treatment of **4a,b** with HCl or HBr in acetone afforded the new 4-chloro (**5a,b**) and 4-bromo (**6a,b**) analogues in good yields, as the 4-nitro substituent behaves as an efficient leaving group, being easily replaced in mild conditions by halogen ions.

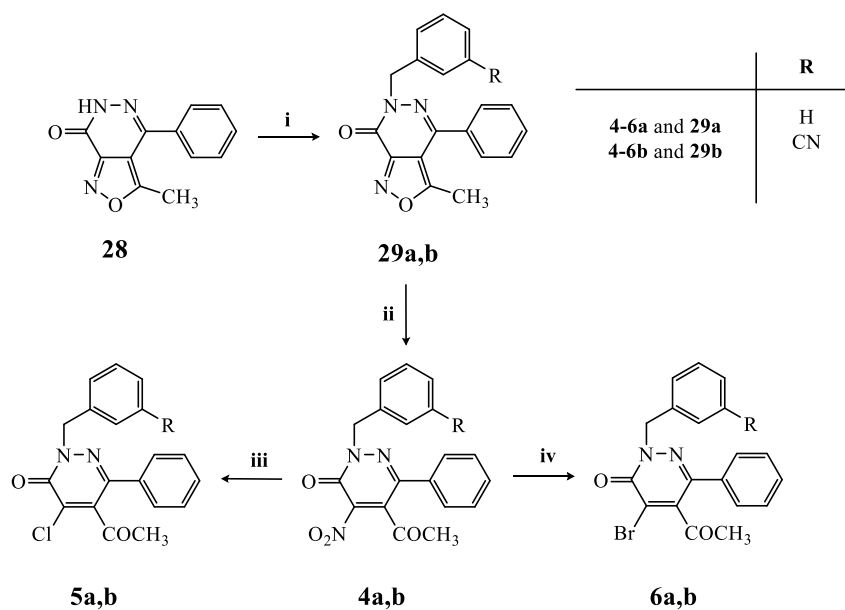

**Scheme S3. Reagents and conditions:** i) R-benzyl bromide (1.5 equiv),  $K_2CO_3$  (2.0 equiv), anhydrous DMF, 1 h, 90 °C; ii) CAN (8.8 equiv), 50% AcOH, 65%  $HNO_3$ , 1 h, 55 °C; iii) 6M HCl, acetone, 5 h, 100 °C; iv) 47% HBr, acetone 2-3 h, 90 °C.

For the synthesis of compound **7** (Scheme S4) the starting material was the isoxazolo[4,3-*d*]pyridazinone **30**<sup>25</sup> (a structural isomer of **28**). This was alkylated to give intermediate **31** which, in turn, was converted into the final 4-acetyl-5-amino derivative **7** by reductive cleavage using ammonium formate as hydrogen source.

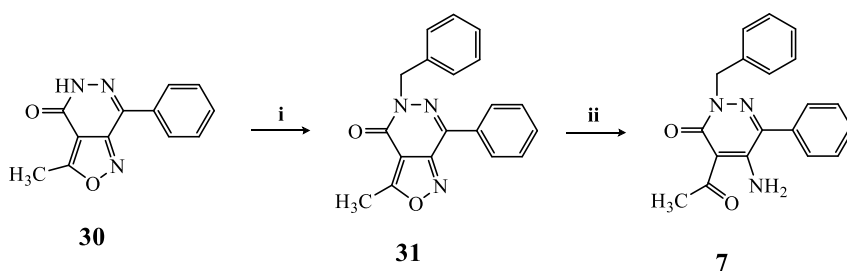

**Scheme S4. Reagents and conditions:** i) benzyl bromide (1.5 equiv),  $K_2CO_3$  (2 equiv), anhydrous DMF, 40 min, 90 °C; ii) ammonium formate (4.3 equiv), 10% Pd/C (catalytic), ethanol, 30 min, reflux.

To synthesise the analogue **8** (Scheme S5), pyridazinone **32** was reacted with the commercially available 3-cyanobenzaldehyde through Knoevenagel condensation. In this step, the basic reaction conditions determined the simultaneous hydration of the nitrile group to carboxylic acid (**33**). The intermediate **33** was alkylated with ethyl bromoacetate to give **34**, which afforded the bi-carboxylic

acid **35** after treatment with 6N NaOH at 60 °C. Compound **8** was obtained through the mixed-anhydride method using ethyl chloroformate and 4-bromoaniline.

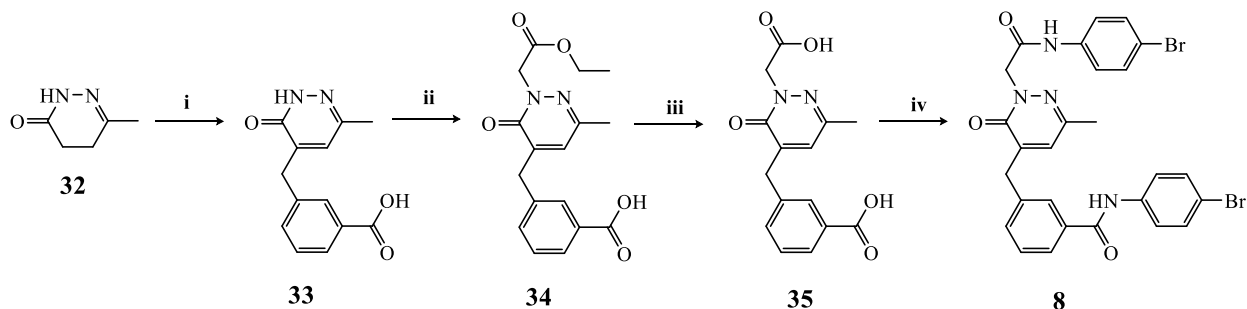

**Scheme S5. Reagents and conditions:** **i**) 3-cyanobenzaldehyde (2 equiv), KOH 5% (w/v) in anhydrous EtOH, 4 h, reflux; **ii**) ethyl bromoacetate (1.5 equiv), K<sub>2</sub>CO<sub>3</sub> (2 equiv), anhydrous CH<sub>3</sub>CN, 2 h, reflux; **iii**) 6N NaOH, 2 h, 60 °C; **iv**) ethyl chloroformate (1.1 equiv), Et<sub>3</sub>N (3.5 equiv), 4-bromoaniline (2 equiv), anhydrous THF, 12 h, -5 °C → rt.

The synthetic pathway affording the analogue **9** is depicted in **Scheme S6**. To synthesise the biarylamine derivative **37**, compound **36**<sup>26</sup> was coupled with a two-fold excess of 4-methoxyphenylboronic acid in the presence of Cu(OAc)<sub>2</sub> and Et<sub>3</sub>N. After standard hydrolysis of the ester group, **38** was processed to usual amidation reaction to afford the final compound **9**.

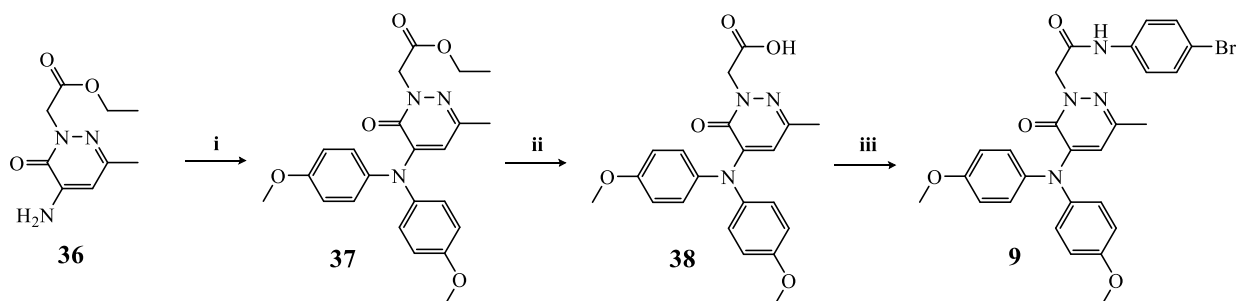

**Scheme S6. Reagents and conditions:** **i**) 4-methoxyphenylboronic acid (2 equiv), Cu(OAc)<sub>2</sub> (1.5 equiv), Et<sub>3</sub>N (2 equiv), CH<sub>2</sub>Cl<sub>2</sub>, 12 h, rt; **ii**) 6N NaOH, 1.5 h, 80 °C; **iii**) ethyl chloroformate (1.1 equiv), Et<sub>3</sub>N (3.5 equiv), 4-bromoaniline (2 equiv), anhydrous THF, 12 h, -5 °C → rt.

To obtain the final compounds **10a-g**, **11** and **12** (see **Scheme S7**), the pyridazinones **32,39**<sup>26</sup> were reacted with the appropriate (hetero)arylaldehyde through Knoevenagel condensation (intermediates **33** and **40a-g**). The subsequent alkylation with bromoethane and potassium carbonate in anhydrous acetonitrile led to the final compounds **10a-g**. The dehydration with POCl<sub>3</sub> at reflux of products **10a** and **10c** afford the final compounds **11** and **12**.

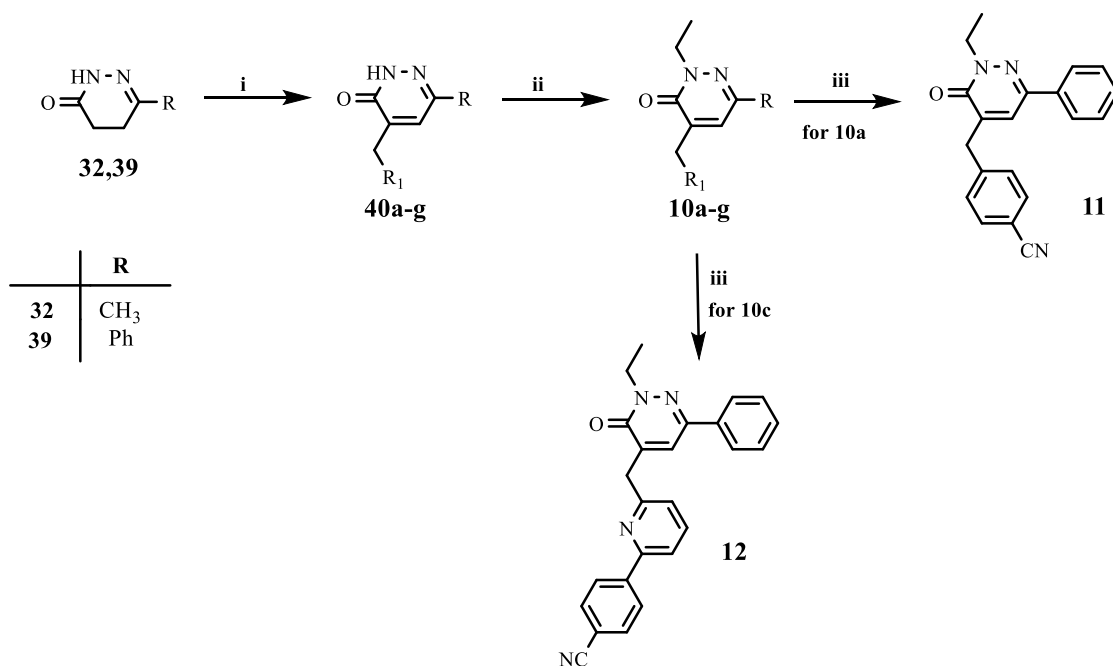

| Comp.   | R  | R <sub>1</sub> | Comp.   | R               | R <sub>1</sub> |
|---------|----|----------------|---------|-----------------|----------------|
| 40a/10a | Ph |                | 40e/10e | Ph              |                |
| 40b/10b | Ph |                | 40f/10f | CH <sub>3</sub> |                |
| 40c/10c | Ph |                | 40g/10g | CH <sub>3</sub> |                |
| 40d/10d | Ph |                |         |                 |                |

**Scheme S7. Reagents and conditions:** **i**) appropriate (hetero)arylaldehyde (1 equiv), KOH 5% (w/v) in anhydrous EtOH, 4 h, reflux; **ii**) bromoethane (2 equiv), K<sub>2</sub>CO<sub>3</sub> (1.5 equiv), anhydrous CH<sub>3</sub>CN, 4-6 h, reflux; **iii**) POCl<sub>3</sub>, 60°C, 2 h.

In the **Scheme S8** is reported the synthetic pathway to obtain the compounds **13a-c**. Starting from 4,6-diphenyl-isoxazol[3,4-d]pyridazin-7(6H)-one (**41**<sup>27</sup>), the reaction with the appropriate amine (for products **13a,b**) or cyclohexanol (for **13c**) in 1,4-dioxane, carried out in closed tube at 90°C, induced an opening of the isoxazole nucleus followed by the formation of the amide, or ester, at position 5 of the pyridazinone scaffold (**13a-c**).

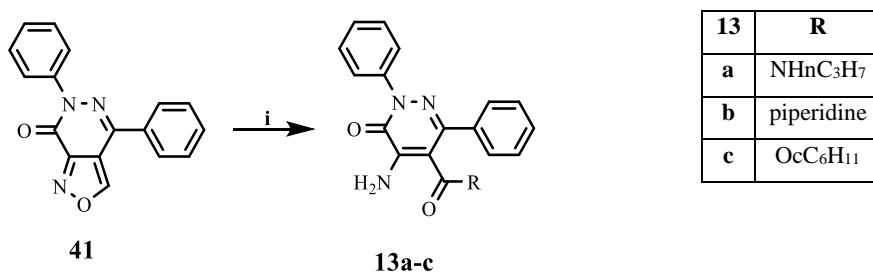

**Scheme S8. Reagents and conditions:** i) Suitable amine or alcohol (3.5 equiv), 1,4-dioxane, 90 °C, 2-3 h.

For the synthesis of compound **14a-c** and **15a-l** (**Scheme S9**), the starting materials were the appropriate isoxazolo[4,3-*d*]pyridazinones **43a-g**<sup>27-29</sup>. The isoxazolopyridazinone **43e** is obtained for alkylation reaction of **42**<sup>30</sup> with bromopropane and K<sub>2</sub>CO<sub>3</sub> in acetone at reflux. The formation of the styryl derivatives **44a-m** (**44a**<sup>31</sup>) was performed by using the appropriate (hetero)arylaldehyde and MeONa in methanol. The opening of the isoxazol ring (for compounds **44a**, **44b** and **44m**) with molybdenumhexacarbonyl in CH<sub>3</sub>CN at reflux gave the acryloyl derivatives **14a-c** and afterwards the products **14a,b** were reduced with ammonium formate and Pd/C in ethanol to obtain the final compounds **15a,b**, respectively. Indeed, the same reduction (ammonium formate and Pd/C) starting from the other styryl derivatives **44** furnished directly the final compounds **15c-l** through a reduced opening.

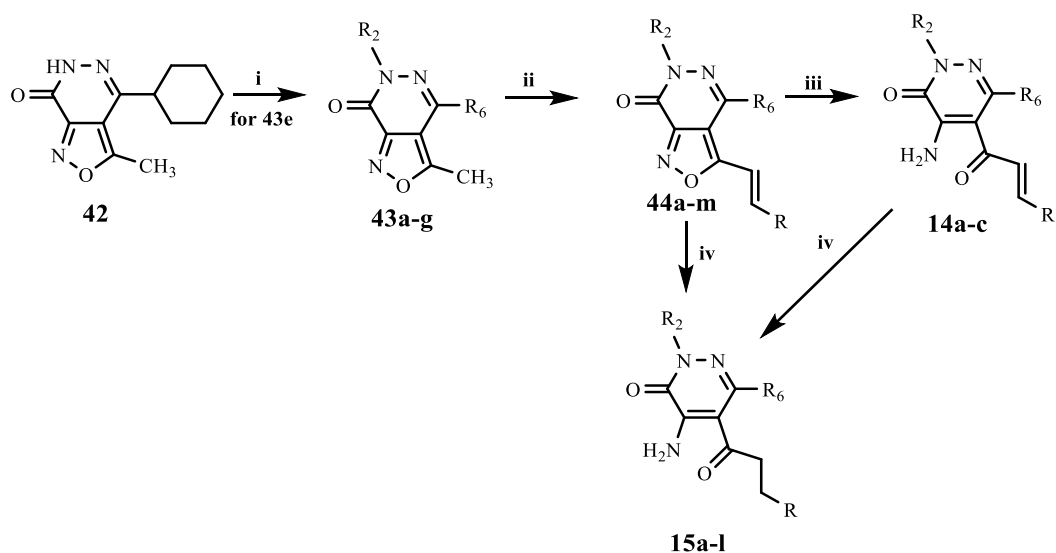

| 43 | R <sub>2</sub>                                                  | R <sub>6</sub>                  |
|----|-----------------------------------------------------------------|---------------------------------|
| a  | CH <sub>3</sub>                                                 | Ph                              |
| b  | CH <sub>2</sub> CH <sub>2</sub> CH <sub>3</sub>                 | Ph                              |
| c  | CH <sub>2</sub> CH <sub>2</sub> CH <sub>2</sub> CH <sub>3</sub> | Ph                              |
| d  | CH(CH <sub>3</sub> ) <sub>2</sub>                               | Ph                              |
| e  | CH <sub>2</sub> CH <sub>2</sub> CH <sub>3</sub>                 | cC <sub>6</sub> H <sub>11</sub> |
| f  | Ph                                                              | Ph                              |
| g  | CH <sub>3</sub>                                                 | 4-F-Ph                          |

| Comp.       | R <sub>2</sub>                                                  | R <sub>6</sub>                  | R          |
|-------------|-----------------------------------------------------------------|---------------------------------|------------|
| 44a/14a/15a | CH <sub>3</sub>                                                 | Ph                              | Ph         |
| 44b/14b/15b | CH <sub>2</sub> CH <sub>2</sub> CH <sub>3</sub>                 | Ph                              | Ph         |
| 44c/15c     | CH <sub>2</sub> CH <sub>2</sub> CH <sub>2</sub> CH <sub>3</sub> | Ph                              | Ph         |
| 44d/15d     | CH(CH <sub>3</sub> ) <sub>2</sub>                               | Ph                              | Ph         |
| 44e/15e     | CH <sub>2</sub> CH <sub>2</sub> CH <sub>3</sub>                 | cC <sub>6</sub> H <sub>11</sub> | Ph         |
| 44f/15f     | Ph                                                              | Ph                              | Ph         |
| 44g/15g     | CH <sub>2</sub> CH <sub>3</sub>                                 | Ph                              | Naphtalene |
| 44h/15h     | CH <sub>2</sub> CH <sub>2</sub> CH <sub>3</sub>                 | Ph                              | Thiophene  |
| 44i/15i     | CH <sub>2</sub> CH <sub>2</sub> CH <sub>3</sub>                 | Ph                              | Naphtalene |
| 44l/15l     | CH <sub>2</sub> CH <sub>2</sub> CH <sub>3</sub>                 | Ph                              | Pyridine   |
| 44m/14c     | CH <sub>3</sub>                                                 | 4-F-Ph                          | Ph         |

**Scheme S9. Reagents and Conditions:** **i**) bromopropane (5 equiv), K<sub>2</sub>CO<sub>3</sub> (2 equiv), acetone, reflux, 5-6 h; **ii**) suitable (hetero)arylaldehyde (2.5 equiv), MeONa (1.2 equiv), anhydrous MeOH, reflux, 2-20 min; **iii**) CH<sub>3</sub>CN, H<sub>2</sub>O (gt), Mo(CO)<sub>6</sub> (1.3 equiv), reflux, 3 h; **iv**) HCOONH<sub>4</sub> (2.5-3 equiv), Pd/C (cat.), EtOH abs., 80 °C, 2 h.

The **Scheme S10** shows the synthetic procedure for pyridazinone derivatives **16a,b** and **17a-c**, starting from the precursors **43f**<sup>27</sup> and **46b**, the latter obtained by a cyclization reaction of compound **45**<sup>32</sup> with polyphosphoric acid and ethanol under heat. The reduction and opening of isoxazolo[3,4-d]pyridazinone nucleus with ammonium formate and Pd/C afforded the compounds **47a,b** (**47a**<sup>27</sup>). Afterward, the deacetylation of **47a,b** with HBr at heat gave the final compounds **16a,b** which were subsequently treated with the opportune anhydride in pyridine to obtain the compounds **17a-c**.

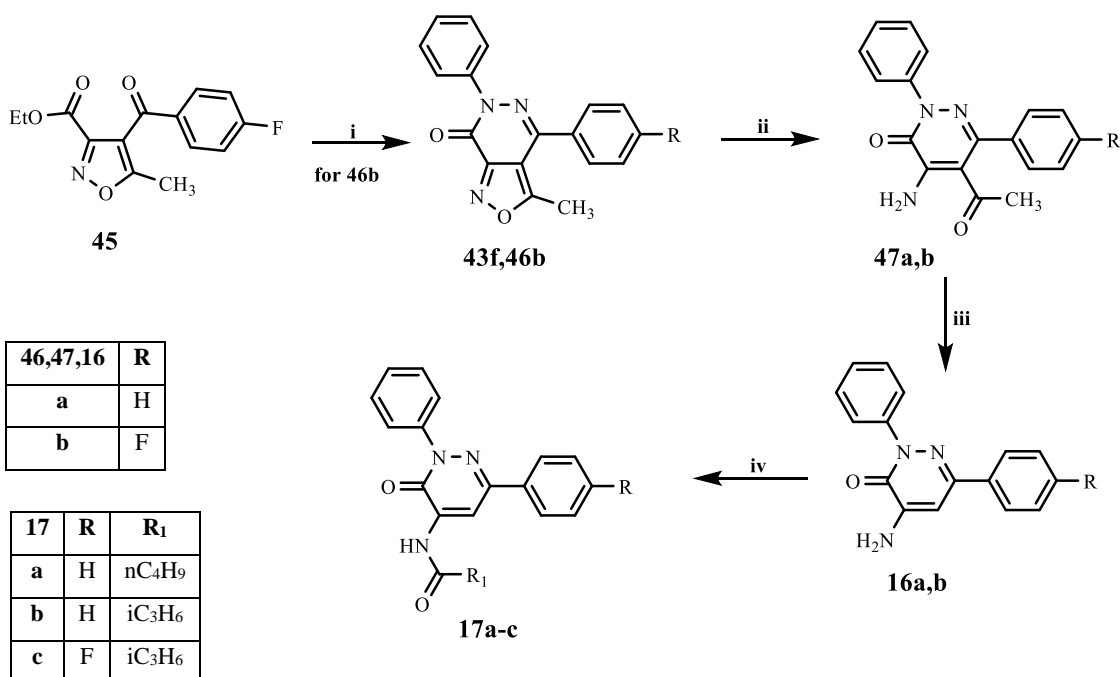



**Scheme S10. Reagents and Conditions:** **i**) Phenylhydrazine (2 equiv), PPA (excess), EtOH abs., 80-90 °C, 1 h and 30 min; **ii**) HCOONH<sub>4</sub> (2.5 equiv), Pd/C (cat.), EtOH abs., 80 °C, 2 h; **iii**) HBr 48% (28.5 equiv), 130 °C, 2 h; **iv**) suitable anhydride (33.5 equiv), pyridine, sealed tube, 140 °C, 3-5 h.

The derivatives **18**, **19** and **20** were prepared from the 4-phenylisoxazolo[3,4-d]pyridazin-7(6H)-one **48**<sup>27</sup> (**Scheme S11**). The treatment of **48** with tert-butylamine in anhydrous 1,4-dioxane in a sealed tube gave the product **49** and the subsequent alkylation with benzyl chloride in the presence of potassium carbonate in acetone yielded the desired compound **18**. Indeed, the reaction of **48** with benzyl alcohol in presence of triethylamine gave the product **19** which was alkylated in the same conditions reported above to obtain the *N*-2-benzyl derivative **20**.

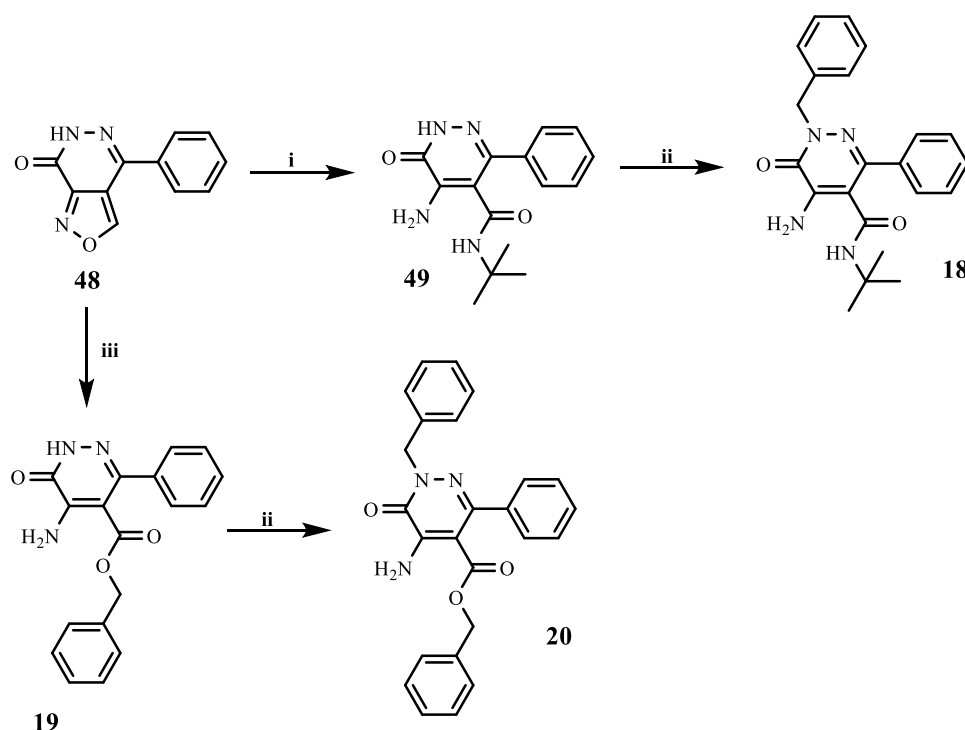

**Scheme S11. Reagents and Conditions:** **i**) *tert*-Butylamine (3 equiv), anhydrous 1,4-dioxane, 80-90 °C, 2 h; **ii**) Benzyl chloride (1.2 equiv), K<sub>2</sub>CO<sub>3</sub> (2 equiv), anhydrous acetone, reflux, 2 h; **iii**) Benzyl alcohol (10 equiv), Et<sub>3</sub>N (2.5 equiv), sealed tube, 80 °C, 3 h.

In **Scheme S12** is depicted the synthesis of compounds **21a-e**. Starting from the diphenylpyridazin-1(6*H*)-acetic acid **50a,b** (**50a**<sup>33</sup> and **50b**<sup>34</sup>), derivatives **21a-e** are obtained through the mixed-anhydride method using ethyl chloroformate and the appropriate amine (propylamine, isopropylamine or cyclopentylamine).

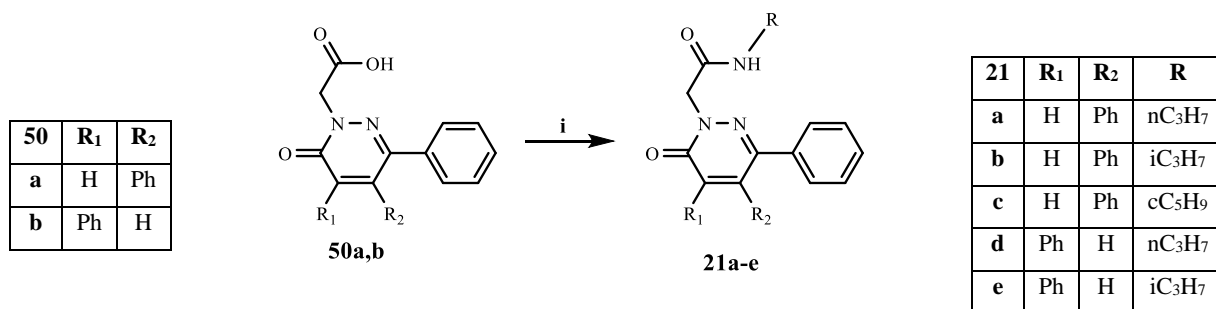

**Scheme S12. Reagents and Conditions:** **i**) ethyl chloroformate (1.1 equiv), Et<sub>3</sub>N (3.5 equiv), suitable amine (2 equiv), anhydrous THF, 12 h, -5 °C → r.t.

## 2. Experimental Section

### 2.1. General remarks

Reagents and starting materials were obtained from commercial sources. Extracts were dried over Na<sub>2</sub>SO<sub>4</sub>, and the solvents were removed under reduced pressure. All reactions were monitored by thin layer chromatography (TLC) using commercial plates pre-coated with Merck silica gel 60 F-254. Visualisation was performed by UV fluorescence ( $\lambda_{\max} = 254$  nm) or by staining with iodine or potassium permanganate. Chromatographic separations were performed on a silica gel column by gravity (Kieselgel 40, 0.063-0.200 mm; Merck) or flash chromatography (Kieselgel 40, 0.040-0.063 mm; Merck). Yields refer to chromatographically and spectroscopically pure compounds, unless otherwise stated. When reactions were performed in anhydrous conditions, the mixtures were maintained under nitrogen atmosphere. Compounds were named following IUPAC rules as applied by Beilstein-Institut AutoNom 2000 (4.01.305) or CA Index Name. The identity and purity of intermediates and final compounds was ascertained through TLC chromatography, NMR and mass spectrometry. <sup>1</sup>H NMR spectra were recorded with Avance 400 instruments (Bruker Biospin Version 002 with SGU). Chemical shifts ( $\delta$ ) are reported in ppm to the nearest 0.01 ppm, using the solvent as internal standard. Coupling constants ( $J$  values) are given in Hz and were calculated using 'TopSpin 1.3' software rounded to the nearest 0.1 Hz. Data are reported as follows: chemical shift, multiplicity [exch, exchange; br, broad; s, singlet; d, doublet; t, triplet; q, quartet; quin, quintet; sext, sextet; sept, septet; m, multiplet; or as a combination of these (e.g. dd, dt *etc.*)], integration, assignment and coupling constant(s). Mass spectra (m/z) were recorded on ESI-TOF mass spectrometer (Bruker

Micro TOF) and reported mass values are within the error limits of  $\pm 5$  ppm mass units. All melting points were determined on a microscope hot stage Büchi apparatus and are uncorrected.

## 2.2. Chemistry

**General Procedure for 23a,b.**  $K_2CO_3$  (6.06 mmol) and tetrabutylammonium bromide (0.30 mmol) were added to a stirred solution of 4,5-dichloro-3(2*H*)-pyridazinone **22** (3.03 mmol) in anhydrous acetonitrile (3 mL). 3- or 4-methoxybenzyl chloride (4.54 mmol) was added to the mixture and the reaction was carried out at reflux for 5 h. The mixture was then allowed to cool down and the solvent was evaporated *in vacuo*. Ice-cold water was added to the residue. After 1 h stirring in ice-bath, compounds **11a,b** were filtered off and recrystallised from ethanol.

**4,5-Dichloro-2-(4-methoxybenzyl)pyridazin-3(2*H*)-one (23a).** Yield = 81 %; mp = 116-117 °C (EtOH).  $^1H$  NMR ( $CDCl_3$ )  $\delta$  3.81 (s, 3H,  $OCH_3$ ), 5.28 (s, 2H,  $NCH_2$ ), 6.88 (d, 2H, Ar,  $J = 8.6$  Hz), 7.42 (d, 2H, Ar,  $J = 8.6$  Hz), 7.79 (s, 1H, pyridaz).

**4,5-Dichloro-2-(3-methoxybenzyl)pyridazin-3(2*H*)-one (23b).** Yield = 60 %; mp = 80-82 °C (EtOH).  $^1H$  NMR ( $CDCl_3$ )  $\delta$  3.82 (s, 3H,  $OCH_3$ ), 5.31 (s, 2H,  $NCH_2$ ), 6.87 (dd, 1H, Ar,  $J = 5.6$  Hz,  $J = 2.6$  Hz), 6.99-7.05 (m, 2H, Ar), 7.27 (t, 1H, Ar,  $J = 3.6$  Hz), 7.80 (s, 1H, pyridaz).

**General Procedure for 24a,b.** Compounds **23a** or **23b** (0.88 mmol) was added to a stirred solution of  $Na^0$  (1.76 mmol) in 3 mL of anhydrous methanol. The reaction mixture was stirred for 1 h at room temperature. After removal of the solvent *in vacuo*, ice-cold water was added to the residue and the precipitate was filtered off by suction and purified by crystallisation from ethanol.

**4-Chloro-5-methoxy-2-(4-methoxybenzyl)pyridazin-3(2*H*)-one (24a).** Yield = 53 %; mp = 135-137 °C (EtOH).  $^1H$  NMR ( $CDCl_3$ )  $\delta$  3.80 (s, 3H,  $C_6H_4-OCH_3$ ), 4.06 (s, 3H,  $OCH_3$  pyridaz.), 5.31 (s, 2H,  $NCH_2$ ), 6.87 (d, 2H, Ar,  $J = 8.6$  Hz), 7.42 (d, 2H, Ar,  $J = 8.6$  Hz), 7.80 (s, 1H, pyridaz).

**4-Chloro-5-methoxy-2-(3-methoxybenzyl)pyridazin-3(2*H*)-one (24b).** Yield = 60 %; mp = 80-82 °C (EtOH).  $^1H$  NMR ( $CDCl_3$ )  $\delta$  3.81 (s, 3H,  $C_6H_4-OCH_3$ ), 4.07 (s, 3H,  $OCH_3$  pyridaz.), 5.34 (s, 2H,  $NCH_2$ ), 6.85 (dd, 1H, Ar,  $J = 6.2$  Hz,  $J = 1.89$  Hz), 6.99 (s, 1H, Ar), 7.03 (d, 1H, Ar,  $J = 7.3$  Hz), 7.26 (t, 1H, Ar,  $J = 7.9$  Hz), 7.83 (s, 1H, pyridaz).

**General Procedure for 1a,b.**  $Na_2CO_3$  (1.42 mmol, 2 M in  $H_2O$ ) was added to the suspension of **24a** or **24b** (0.71 mmol),  $Pd(PPh_3)_4$  [tetrakis (triphenylphosphine)palladium(0)] (0.02 mmol) and 4-butoxyphenylboronic acid (1.07 mmol) in toluene (2 mL). The mixture was stirred at reflux for 2 h. Extra 4-butoxyphenylboronic acid (1.07 mmol) was added and the reaction was refluxed for

additional 6 h. The solvent was evaporated under *vacuum* and the suspension was diluted with ice-cold water. After extraction with CH<sub>2</sub>Cl<sub>2</sub>, the organic layer was dried over Na<sub>2</sub>SO<sub>4</sub> and the residue was purified by flash column chromatography using cyclohexane/ethyl acetate 3:1 as eluent.

**4-(4-Butoxyphenyl)-5-methoxy-2-(4-methoxybenzyl)pyridazin-3(2H)-one (1a).** Yield = 82 %; colorless oil. <sup>1</sup>H NMR (CDCl<sub>3</sub>) δ 0.99 (t, 3H, CH<sub>2</sub>CH<sub>3</sub>, *J* = 7.4 Hz), 1.51 (sext, 2H, CH<sub>2</sub>CH<sub>3</sub>, *J* = 7.6 Hz), 1.79 (quin, 2H, CH<sub>2</sub>CH<sub>2</sub>CH<sub>2</sub>, *J* = 6.9 Hz), 3.80 (s, 3H, C<sub>6</sub>H<sub>4</sub>-OCH<sub>3</sub>), 3.89 (s, 3H, OCH<sub>3</sub> pyridaz.), 4.01 (t, 2H, OCH<sub>2</sub>, *J* = 6.5 Hz), 5.31 (s, 2H, NCH<sub>2</sub>), 6.87 (d, 2H, Ar, *J* = 8.6 Hz), 6.94 (d, 2H, Ar, *J* = 8.8 Hz), 7.48 (q, 4H, Ar, *J* = 8.0 Hz), 7.89 (s, 1H, pyridaz.).

**4-(4-Butoxyphenyl)-5-methoxy-2-(3-methoxybenzyl)pyridazin-3(2H)-one (1b).** Yield = 28 %; colorless oil. <sup>1</sup>H NMR (CDCl<sub>3</sub>) δ 0.99 (t, 3H, CH<sub>2</sub>CH<sub>3</sub>, *J* = 7.4 Hz), 1.51 (sext, 2H, CH<sub>2</sub>CH<sub>3</sub>, *J* = 7.4 Hz), 1.79 (quin, 2H, CH<sub>2</sub>CH<sub>2</sub>CH<sub>2</sub>, *J* = 6.9 Hz), 3.81 (s, 3H, C<sub>6</sub>H<sub>4</sub>-OCH<sub>3</sub>), 3.90 (s, 3H, OCH<sub>3</sub> pyridaz.), 4.00 (t, 2H, OCH<sub>2</sub>, *J* = 6.5 Hz), 5.35 (s, 2H, NCH<sub>2</sub>), 6.84 (dd, 1H, Ar, *J* = 6.0 Hz, *J* = 2.3 Hz), 6.94 (d, 2H, Ar, *J* = 8.7 Hz), 7.02 (s, 1H, Ar), 7.06 (d, 1H, Ar, *J* = 7.6 Hz), 7.26 (t, 1H, Ar, *J* = 8.0 Hz), 7.51 (d, 2H, Ar, *J* = 8.7 Hz), 7.91 (s, 1H, pyridaz.).

**General Procedure for 2a,b.** Na<sub>2</sub>CO<sub>3</sub> (0.53 mmol, 2 M in H<sub>2</sub>O) was added to a suspension of **23a** or **23b** (0.53 mmol), PdCl<sub>2</sub>[(C<sub>2</sub>H<sub>5</sub>)<sub>3</sub>P]<sub>2</sub> [trans-dichlorobis(triethylphosphine)palladium(II)] (0.05 mmol) and 4-butoxyphenylboronic acid (0.26 mmol) in DMF (2 mL). The mixture was stirred at room temperature for 12 h, diluted with ice-cold water and extracted with CH<sub>2</sub>Cl<sub>2</sub>. The organic layer was dried over Na<sub>2</sub>SO<sub>4</sub> and the residue was purified by flash column chromatography using CH<sub>2</sub>Cl<sub>2</sub> (for **2a**) and CH<sub>2</sub>Cl<sub>2</sub>/MeOH/NH<sub>4</sub>OH 99:1:0.1 (for **2b**) as eluents.

**5-(4-Butoxyphenyl)-4-chloro-2-(4-methoxybenzyl)pyridazin-3(2H)-one (2a).** Yield = 22 %; mp = 84-85 °C (EtOH). <sup>1</sup>H NMR (CDCl<sub>3</sub>) δ 1.01 (t, 3H, CH<sub>2</sub>CH<sub>3</sub>, *J* = 7.4 Hz), 1.53 (sext, 2H, CH<sub>2</sub>CH<sub>3</sub>, *J* = 7.6 Hz), 1.82 (quin, 2H, CH<sub>2</sub>CH<sub>2</sub>CH<sub>2</sub>, *J* = 6.8 Hz), 3.81 (s, 3H, OCH<sub>3</sub>), 4.03 (t, 2H, OCH<sub>2</sub>, *J* = 6.5 Hz), 5.34 (s, 2H, NCH<sub>2</sub>), 6.90 (d, 2H, Ar, *J* = 8.4 Hz), 7.01 (d, 2H, Ar, *J* = 8.6 Hz), 7.48 (dd, 4H, Ar, *J* = 5.9 Hz, *J* = 8.6 Hz), 7.78 (s, 1H, pyridaz.).

**5-(4-Butoxyphenyl)-4-chloro-2-(3-methoxybenzyl)pyridazin-3(2H)-one (2b).** Yield = 14 %; mp = 73-75 °C (EtOH). <sup>1</sup>H NMR (CDCl<sub>3</sub>) δ 1.01 (t, 3H, CH<sub>2</sub>CH<sub>3</sub>, *J* = 7.4 Hz), 1.53 (sext, 2H, CH<sub>2</sub>CH<sub>3</sub>, *J* = 7.5 Hz), 1.82 (quin, 2H, CH<sub>2</sub>CH<sub>2</sub>CH<sub>2</sub>, *J* = 7.0 Hz), 3.83 (s, 3H, OCH<sub>3</sub>), 4.04 (t, 2H, OCH<sub>2</sub>, *J* = 6.5 Hz), 5.38 (s, 2H, NCH<sub>2</sub>), 6.88 (dd, 1H, Ar, *J* = 5.7 Hz, *J* = 2.6 Hz), 7.02 (d, 2H, Ar, *J* = 8.8 Hz), 7.07 (s, 1H, Ar), 7.10 (d, 1H, Ar, *J* = 7.6 Hz), 7.29 (t, 1H, Ar, *J* = 8.0 Hz), 7.47 (d, 2H, Ar, *J* = 8.7 Hz), 7.79 (s, 1H, pyridaz.).

**Ethyl-2-[3-cyclohexyl-6-oxopyridazin-1(6H)-yl]acetate (26).** A mixture of **25** (2.27 mmol), K<sub>2</sub>CO<sub>3</sub> (4.54 mmol) and ethyl bromoacetate (3.41 mmol) in CH<sub>3</sub>CN (3 mL) was refluxed under stirring for 3 h. The mixture was then concentrated *in vacuo*, diluted with cold water and extracted with CH<sub>2</sub>Cl<sub>2</sub> (3 x 15 mL). The organic layer was evaporated and intermediate **26** was used in the following reaction without further purification. Yield ~ 100 %; oil. <sup>1</sup>H NMR (CDCl<sub>3</sub>) δ 1.28-1.46 (m, 8H, (2 x CH<sub>2</sub> + CH-*H*) cyclohexyl + CH<sub>2</sub>CH<sub>3</sub>), 1.71-1.86 (m, 5H, 2 x CH<sub>2</sub> + CH-*H* cyclohexyl), 2.51-2.60 (m, 1H, CH, cyclohexyl), 4.23 (dt, 2H, CH<sub>2</sub>CH<sub>3</sub>, *J* = 4.3 Hz, *J* = 1.4 Hz), 4.83 (s, 2H, NCH<sub>2</sub>CO), 6.90 (d, 1H, Ar, *J* = 9.0 Hz), 7.17 (d, 1H, Ar, *J* = 9.6 Hz).

**2-[3-Cyclohexyl-6-oxopyridazin-1(6H)-yl]acetic acid (27).** A suspension of derivative **26** (0.91 mmol) in 6 N NaOH (4 mL) was stirred at 80 °C for 2 h. The mixture was then diluted with cold water and acidified with 6 N HCl. Product **27** was collected by filtration and recrystallised from ethanol. Yield = 82 %; mp = 195-197 °C (EtOH). <sup>1</sup>H NMR (CDCl<sub>3</sub>) δ 1.25-1.34 (m, 1H, CH-*H* cyclohexyl), 1.37-1.46 (m, 4H, 2 x CH<sub>2</sub> cyclohexyl), 1.76 (m, 1H, CH-*H* cyclohexyl), 1.79-1.93 (m, 4H, 2 x CH<sub>2</sub> cyclohexyl), 2.50-2.60 (m, 1H, CH cyclohexyl), 4.94 (s, 2H, NCH<sub>2</sub>CO), 6.99 (d, 1H, Ar, *J* = 9.5 Hz), 7.24 (d, 1H, Ar, *J* = 9.6 Hz).

**General procedure for 3a,b.** Et<sub>3</sub>N (2.06 mmol) was added to a cooled (-5 °C) and stirred solution of intermediate **27** (0.59 mmol) in anhydrous tetrahydrofuran (3 mL). After 30 min, the mixture was allowed to warm up to 0 °C and ethyl chloroformate (0.65 mmol) was added. After 1 h, the appropriately substituted arylamine (1.18 mmol) was added. The reaction was carried out at room temperature for 12 h. The mixture was then concentrated *in vacuo*, diluted with cold water (10-15 mL) and extracted with CH<sub>2</sub>Cl<sub>2</sub> (3 x 15 mL). The solvent was evaporated to afford final compounds **3a,b**, which were purified by column chromatography using cyclohexane/ethyl acetate 1:1 (for compound **3a**) and cyclohexane/ethyl acetate 1:2 (for compound **3b**) as eluents.

***N*-(4-Fluorophenyl)-2-[3-cyclohexyl-6-oxopyridazin-1(6H)-yl]acetamide (3a).** Yield = 98 %; mp = 149-151 °C (EtOH). <sup>1</sup>H NMR (CDCl<sub>3</sub>) δ 1.21-1.30 (m, 1H, CH-*H* cyclohexyl), 1.39-1.48 (m, 4H, 2 x CH<sub>2</sub> cyclohexyl), 1.77 (d, 1H, CH-*H* cyclohexyl, *J* = 12.6 Hz), 1.85-1.93 (m, 4H, 2 x CH<sub>2</sub> cyclohexyl), 2.56-2.63 (m, 1H, CH cyclohexyl), 4.96 (s, 2H, NCH<sub>2</sub>CO), 6.94-7.02 (m, 3H, Ar), 7.27 (d, 1H, Ar, *J* = 9.7 Hz), 7.46-7.51 (m, 2H, Ar), 9.10 (exch br s, 1H, NH).

***N*-(1,3-Benzodioxol-5-yl)-2-[3-cyclohexyl-6-oxopyridazin-1(6H)-yl]acetamide (3b).** Yield = 99%; mp = 185-187 °C (EtOH). <sup>1</sup>H NMR (CDCl<sub>3</sub>) δ 1.20-1.28 (m, 1H, CH-*H* cyclohexyl), 1.30-1.48 (m, 4H, 2 x CH<sub>2</sub> cyclohexyl), 1.76 (d, 1H, CH-*H* cyclohexyl, *J* = 12.8 Hz), 1.85-1.93 (m, 4H, 2 x CH<sub>2</sub> cyclohexyl), 2.59-2.61 (m, 1H, CH cyclohexyl), 4.93 (s, 2H, NCH<sub>2</sub>CO), 5.94 (s, 2H, OCH<sub>2</sub>O), 6.72

(d, 1H, Ar,  $J = 8.4$  Hz), 6.81 (dd, 1H, Ar,  $J = 6.3$  Hz,  $J = 2.1$  Hz), 7.00 (d, 1H, Ar,  $J = 9.5$  Hz), 7.25-7.28 (m, 2H, Ar), 8.86 (exch br s, 1H, NH).

**General procedure for 5a,b.** A mixture of **4a**<sup>24</sup> or **4b**<sup>24</sup> (0.20 mmol), acetone (2 mL) and 6 M HCl (4 mL) was warmed in a sealed tube at 100°C for 5 h. The solvent was removed *in vacuo* and the residue was treated with cold water. The precipitate was purified by recrystallisation from ethanol to give pure **5a** and **5b** as colourless crystals or yellowish crystals, respectively.

**5-Acetyl-2-benzyl-4-chloro-6-phenylpyridazin-3(2H)-one (5a).** Yield = 45 %; mp = 143-146 °C (EtOH). <sup>1</sup>H NMR (CDCl<sub>3</sub>)  $\delta$  2.20 (s, 3H, CH<sub>3</sub>), 5.45 (s, 2H, CH<sub>2</sub>), 7.30-7.60 (m, 10H, 2 x C<sub>6</sub>H<sub>5</sub>).

**5-Acetyl-4-chloro-2-(3-cyanobenzyl) -6-phenylpyridazin-3(2H)-one (5b).** Yield = 45%; mp = 141-143 °C (EtOH). <sup>1</sup>H NMR (CDCl<sub>3</sub>)  $\delta$  2.20(s, 3H, CH<sub>3</sub>), 5.45 (s, 2H, CH<sub>2</sub>), 7.30-7.60 (m, 10H, 2 x C<sub>6</sub>H<sub>5</sub>).

**General procedure for 6a,b.** A mixture of **4a**<sup>24</sup> or **4b**<sup>24</sup> (0.09 mmol) acetone (1 mL) and 47% HBr (1 mL) was warmed in a sealed tube at 90°C for 2-3 h. After concentration *in vacuo*, ice-cold water was added and the was collected by suction. Recrystallisation from ethanol gave **6a** as colourless solid. Purification through column chromatography (eluent: toluene/ethyl acetate 8:2) afforded pure **6b** as colourless crystals.

**5-Acetyl-2-benzyl-4-bromo-6-phenylpyridazin-3(2H)-one (6a).** Yield = 61%; mp = 140-143 °C (EtOH). <sup>1</sup>H NMR (CDCl<sub>3</sub>)  $\delta$  2.15 (s, 3H, CH<sub>3</sub>), 5.45 (s, 2H, CH<sub>2</sub>), 7.30-7.60 (m, 10H, 2 x C<sub>6</sub>H<sub>5</sub>).

**5-Acetyl-4-bromo-2-(3-cyanobenzyl) -6-phenylpyridazin-3(2H)-one (6b).** Yield = 85%; mp = 150-153 °C (EtOH). <sup>1</sup>H NMR (CDCl<sub>3</sub>)  $\delta$  2.20 (s, 3H, CH<sub>3</sub>), 5.45 (s, 2H, CH<sub>2</sub>), 7.40-7.85 (m, 10H, 2 x C<sub>6</sub>H<sub>5</sub>).

**5-Benzyl- 3-methyl-7-phenylisoxazolo[4,3-d]pyridazin-4(5H)-one (31).** A mixture of compound **30**<sup>24</sup> (0.45 mmol), K<sub>2</sub>CO<sub>3</sub> (0.90 mmol), benzyl bromide (0.70 mmol) and anhydrous DMF (1.2 mL) was warmed at 90°C for 40 min. After cooling and treatment with ice cold water, the precipitate was collected by suction. Recrystallisation from ethanol gave pure compound **31** as colourless crystals. Yield = 73%; mp = 128-130 °C (EtOH). <sup>1</sup>H NMR (CDCl<sub>3</sub>)  $\delta$  2.95 (s, 3H, CH<sub>3</sub>), 5.35 (s, 2H, CH<sub>2</sub>), 7.30-7.60 (m, 10H, 2 x C<sub>6</sub>H<sub>5</sub>).

**4-Acetyl-5-amino-2-benzyl-6-phenylisoxazolo-3(2H)-one (7).** A suspension of intermediate **31** (0.22 mmol), 10% Pd/C (0.05 mmol) and ammonium formate (0.95 mmol) in ethanol (1 mL) was refluxed for 30 min. After cooling, methylene chloride (15 mL) was added and the precipitate was filtered off.

Evaporation *in vacuo* afforded the crude product which was recrystallised from ethanol to give pure **7** as colourless crystals. Yield = 59 %; mp = 153-155 °C (EtOH). <sup>1</sup>H NMR (CDCl<sub>3</sub>) δ 2.75 (s, 3H, CH<sub>3</sub>), 5.30 (s, 2H, CH<sub>2</sub>), 7.25-7.60 (m, 10H, 2 x C<sub>6</sub>H<sub>5</sub>).

**3-[(6-Methyl-3-oxo-2,3-dihydropyridazin-4-yl)methyl]benzoic acid (33)**. Compound **32** (1.78 mmol) and 3-cyanobenzaldehyde (3.56 mmol) were added to 6 mL of KOH in absolute EtOH (5%, w/v). The mixture was refluxed under stirring for 4 h. After cooling, the suspension was concentrated *in vacuo*, diluted with ice-cold water (10 mL) and acidified with 2 N HCl. After 1 h stirring in ice-bath, the precipitate was filtered off and purified by crystallisation from ethanol. Yield = 70 %; mp = 164-166 °C (EtOH). <sup>1</sup>H NMR (CDCl<sub>3</sub>) δ 2.18 (s, 3H, 6-CH<sub>3</sub>), 3.80 (s, 2H, CHCCH<sub>2</sub>), 7.06 (s, 1H, pyridaz), 7.33 (d, 2H, Ar, *J* = 8.2 Hz), 7.80 (d, 2H, Ar, *J* = 8.1 Hz), 12.72 (exch br s, 1H, OH). IR (cm<sup>-1</sup>): 3300 (NH), 3200 (OH), 1649 (CO), 1608 (CO).

**3-[[2-(2-Ethoxy-2-oxoethyl)-6-methyl-3-oxo-2,3-dihydropyridazin-4-yl]methyl]benzoic acid (34)**. A mixture of compound **33** (1.56 mmol), K<sub>2</sub>CO<sub>3</sub> (3.12 mmol) and ethyl bromoacetate (2.34 mmol) in anhydrous CH<sub>3</sub>CN (6 mL) was refluxed under stirring for 2 h. The mixture was then concentrated *in vacuo* and diluted with cold water. After 1 h stirring in ice-bath, the yellow precipitate was filtered off by suction and purified by recrystallisation from ethanol. Yield = 78 %; mp = 174-176 °C (EtOH). <sup>1</sup>H NMR (CDCl<sub>3</sub>) δ 1.31 (t, 3H, CH<sub>2</sub>CH<sub>3</sub>, *J* = 7.2 Hz), 2.25 (s, 3H, 3-CH<sub>3</sub>), 3.96 (s, 2H, CHCCH<sub>2</sub>), 4.26 (q, 2H, CH<sub>2</sub>CH<sub>3</sub>, *J* = 7.2 Hz), 4.86 (s, 2H, NCH<sub>2</sub>CO), 6.70 (s, 1H, pyridaz), 7.34 (d, 2H, Ar, *J* = 7.7 Hz), 7.80 (d, 2H, Ar, *J* = 7.7 Hz).

**3-[[2-(Carboxymethyl)-6-methyl-3-oxo-2,3-dihydropyridazin-4-yl]methyl] benzoic acid (35)**. A suspension of the intermediate **34** (1.22 mmol) in 6 N NaOH (5 mL) was stirred at 60 °C for 2 h. The mixture was diluted with ice-cold water (3 mL), acidified with 6 N HCl and the final product **35** was then filtered off by suction and recrystallised from ethanol. Yield = 76 %; mp = 225-227 °C (EtOH). <sup>1</sup>H NMR (CDCl<sub>3</sub>) δ 2.22 (s, 3H, 6-CH<sub>3</sub>), 3.87 (s, 2H, CHCCH<sub>2</sub>), 4.69 (s, 2H, NCH<sub>2</sub>CO), 7.15 (s, 1H, pyridaz), 7.39 (d, 2H, Ar, *J* = 8.0 Hz), 7.88 (d, 2H, Ar, *J* = 8.0 Hz), 13.01 (exch br s, 2H, 2 x OH).

**N-(4-Bromophenyl)-3-{2-[(4-bromophenylcarbonyl)methyl]-6-methyl-3-oxo-2,3-dihydro-pyridazin-4-ylmethyl}benzamide (8)**. Et<sub>3</sub>N (3.26 mmol) was added to a cooled (-5 °C) and stirred solution of compound **35** (0.93 mmol) in anhydrous tetrahydrofuran (7 mL). After 30 min, the mixture was allowed to warm up to 0 °C and ethyl chloroformate (1.02 mmol) was added. After 1 h, 4-bromo aniline (1.86 mmol) was added. The reaction was carried out at room temperature for 12 h. The mixture was then concentrated *in vacuo*, diluted with cold water (15 mL) and extracted with CH<sub>2</sub>Cl<sub>2</sub> (3 x 15 mL). After removal of the solvent, the residue was purified by column chromatography using

CH<sub>2</sub>Cl<sub>2</sub>/CH<sub>3</sub>OH/NH<sub>4</sub>OH 9.5:0.5:0.05 as eluent. The pure sample of **8** was obtained from a further purification through a silica gel preparative TLC (eluent: CH<sub>2</sub>Cl<sub>2</sub>/CH<sub>3</sub>OH/ NH<sub>4</sub>OH 9.5:0.5:0.05). Yield = 10 %; mp = 226-228 °C (EtOH). <sup>1</sup>H NMR (CDCl<sub>3</sub>) δ 2.31 (s, 3H, 6-CH<sub>3</sub>), 4.00 (s, 2H, CHCCH<sub>2</sub>), 4.93 (s, 2H, NCH<sub>2</sub>CO), 6.83 (s, 1H, pyridaz), 7.40 (t, 6H, Ar, *J* = 8.4 Hz), 7.51 (d, 2H, Ar, *J* = 8.7 Hz), 7.57 (d, 2H, Ar, *J* = 8.9 Hz), 7.84 (d, 2H, Ar, *J* = 7.7 Hz), 8.67 (exch br s, 1H, NH). MS (ESI) calcd. For C<sub>27</sub>H<sub>22</sub>Br<sub>2</sub>N<sub>4</sub>O<sub>3</sub>, 610.30. Found: *m/z* 609 [M - H]<sup>-</sup>, 611.2 [M + H]<sup>+</sup>.

**Ethyl-2-{5-[bis(4-methoxyphenyl)amino]-3-methyl-6-oxopyridazin-1(6H)-yl}acetate (37).** Et<sub>3</sub>N (0.64 mmol) was added to a suspension of compound **36**<sup>25</sup> (0.57 mmol), copper acetate (0.85 mmol) and 4-methoxyphenylboronic acid (1.14 mmol) in CH<sub>2</sub>Cl<sub>2</sub> (3 mL). The mixture was stirred at room temperature for 14 h and extracted with 15% aqueous ammonia (3 x 10 mL). The organic layer was washed with 10 mL of water and dried over Na<sub>2</sub>SO<sub>4</sub>. After removal of the solvent *in vacuo*, the residue was purified by flash column chromatography using cyclohexane/ethyl acetate 1:3 as eluent. Yield = 21 %; colourless oil. <sup>1</sup>H NMR (CDCl<sub>3</sub>) δ 1.28 (t, 3H, CH<sub>2</sub>CH<sub>3</sub>, *J* = 7.2 Hz), 2.18 (s, 3H, 3-CH<sub>3</sub>), 3.81 (s, 6H, 2 x OCH<sub>3</sub>), 4.21 (q, 2H, CH<sub>2</sub>CH<sub>3</sub>, *J* = 7.2 Hz), 4.83 (s, 2H, NCH<sub>2</sub>CO), 6.32 (s, 1H, pyridaz), 6.86 (dd, 4H, Ar, *J* = 3.4 Hz, *J* = 2.3 Hz), 6.99 (dd, 4H, Ar, *J* = 4.5 Hz, *J* = 2.3 Hz).

**2-{5-[Bis-(4-methoxyphenyl)amino]-3-methyl-6-oxopyridazin-1(6H)-yl}acetic acid (38).** A suspension of the intermediate **37** (0.12 mmol), 6 NaOH (10 mL) and EtOH (3 mL) was stirred at rt 12 h. After removal of the solvent under vacuum, the mixture was diluted with ice-cold water and acidified with 6 N HCl. After 1 h stirring in ice-bath, the product **38** was collected by filtration and recrystallised from ethanol. Yield = 84 %; mp = 192-193 °C (EtOH). <sup>1</sup>H NMR (CDCl<sub>3</sub>) δ 2.20 (s, 3H, 3-CH<sub>3</sub>), 3.82 (s, 6H, 2 x OCH<sub>3</sub>), 4.88 (s, 2H, NCH<sub>2</sub>CO), 6.34 (s, 1H, pyridaz), 6.86 (d, 4H, Ar, *J* = 8.8 Hz), 6.99 (d, 4H, Ar, *J* = 8.8 Hz).

**N-(4-Bromophenyl)-2-{5-[bis(4-methoxyphenyl)amino]-3-methyl-6-oxopyridazin-1(6H)-yl}acetamide (9).** Et<sub>3</sub>N (0.35 mmol) was added to a cooled (-5 °C) and stirred solution of compound **38** (0.10 mmol) in anhydrous tetrahydrofuran (4 mL). After 30 min, the mixture was allowed to warm up to 0 °C and ethyl chloroformate (0.11 mmol) was added. After 1 h 4-bromo aniline (0.20 mmol) was added and the reaction was carried out at room temperature for 12 h. The mixture was then concentrated *in vacuo*, diluted with cold water (10 mL) and extracted with CH<sub>2</sub>Cl<sub>2</sub> (3 x 15 mL). The solvent was evaporated to afford final compound **9**, which was purified by flash column chromatography using cyclohexane/ethyl acetate 1:1 as eluent. Yield = 55 %; mp = 244-245 °C (EtOH). <sup>1</sup>H NMR (CDCl<sub>3</sub>) δ 2.23 (s, 3H, 3-CH<sub>3</sub>), 3.79 (s, 6H, 2 x OCH<sub>3</sub>), 4.81 (s, 2H, NCH<sub>2</sub>CO), 6.39 (s, 1H, pyridaz), 6.84 (dd, 4H, Ar, *J* = 4.6 Hz, *J* = 2.2 Hz), 6.99 (dd, 4H, Ar, *J* = 2.2 Hz, *J* = 3.4 Hz), 7.25-7.38 (m, 4H, Ar), 9.00 (exch br s, 1H, NH).



**General procedure for compounds 40a-g.** Compounds **40a-g** were obtained using the same procedure (Knoevenagel condensation) and treatment followed for the synthesis of intermediate **33**, using the appropriate (hetero)arylaldehyde and starting from compound **39**. The products were recovered by *vacuum* filtration and purified by crystallization from diethyl ether (for **40a**) or ethanol (for **40b-g**).

**4-((3-Oxo-6-phenyl-2,3-dihydropyridazin-4-yl)methyl)benzamide (40a).** Yield = 57 %; mp = 263-266 °C (EtOH). <sup>1</sup>H NMR (DMSO-d<sub>6</sub>) δ 3.92 (s, 2H, CH<sub>2</sub>-Ph), 7.30 (exch br s, 1H, CONH-H), 7.40-7.55 (m, 5H, Ar), 7.80-7.85 (m, 4H, Ar), 7.91 (exch br s, 1H, CONH-H), 7.93 (s, 1H, pyridaz.), 13.17 (exch br s, 1H, NH).

**6-Phenyl-4-(4-(pyrimidin-5-yl)benzyl)pyridazin-3(2H)-one (40b).** Yield = 82 %; mp = 242-244 °C (EtOH). <sup>1</sup>H NMR (DMSO-d<sub>6</sub>) δ 3.95 (s, 2H, CH<sub>2</sub>-Ph), 7.42-7.55 (m, 5H, Ar), 7.76 (d, 2H, Ar, *J* = 8.0 Hz), 7.84 (d, 2H, Ar, *J* = 7.2 Hz), 8.00 (s, 1H, pyridaz.), 9.13 (s, 2H, pyrimidine), 9.17 (s, 1H, pyrimidine), 13.18 (exch br s, 1H, NH).

**4-(6-((3-Oxo-6-phenyl-2,3-dihydropyridazin-4-yl)methyl)pyridin-2-yl)benzamide (40c).** Yield = 65 %; mp = 243-247 °C (EtOH). <sup>1</sup>H NMR (DMSO-d<sub>6</sub>) δ 4.15 (s, 2H, -CH<sub>2</sub>-), 7.36 (d, 1H, pyridine, *J* = 7.2 Hz), 7.42 (exch br s, 1H, CONH-H), 7.43-7.53 (m, 3H, Ar), 7.84-7.92 (m, 4H, 2H Ar + 2H pyridine), 7.95 (d, 2H, Ar, *J* = 8.4 Hz), 8.04 (exch br s, 1H, CONH-H), 8.05 (s, 1H, pyridaz.), 8.13 (d, 2H, Ar, *J* = 8.4 Hz), 13.21 (exch br s, 1H, NH).

**4-(3-(Cyclopentyloxy)-4-methoxybenzyl)-6-phenylpyridazin-3(2H)-one (40d).** Yield = 65 %; mp = 243-247 °C (EtOH). <sup>1</sup>H NMR (CDCl<sub>3</sub>) δ 1.55-1.68 (m, 2H, cyclopent.), 1.80-2.00 (m, 6H, cyclopent.), 3.88 (s, 3H, OCH<sub>3</sub>), 3.94 (s, 2H, -CH<sub>2</sub>-Ph), 4.77-4.82 (m, 1H, cyclopent.), 6.80-6.90 (m, 3H, Ar), 7.33 (s, 1H, pyridaz.), 7.43-7.48 (m, 3H, Ar), 7.65-7.70 (m, 2H, Ar), 11.02 (exch br s, 1H, NH).

**6-Phenyl-4-(3-(pyridin-2-yl)benzyl)pyridazin-3(2H)-one (40e).** Yield = 51 %; mp = 199-200 °C (EtOH). <sup>1</sup>H NMR (DMSO-d<sub>6</sub>) δ 3.94 (s, 2H, CH<sub>2</sub>-Ph), 7.33 (dd, 1H, pyridine, *J* = 4.8 Hz and *J* = 7.2 Hz), 7.41-7.51 (m, 5H, Ar), 7.83 (d, 2H, Ar, *J* = 8.0 Hz), 7.87 (d, 1H, pyridine, *J* = 7.6 Hz), 7.93 (d, 1H, pyridine, *J* = 8.0 Hz), 7.96 (s, 1H, pyridaz.), 8.03 (d, 2H, Ar, *J* = 8.0 Hz), 8.65 (m, 1H, pyridine), 13.18 (exch br s, 1H, NH).

**4-(3-(Cyclopentyloxy)-4-methoxybenzyl)-6-methylpyridazin-3(2H)-one (40f).** Yield = 17 %; mp = 155-157 °C (EtOH). <sup>1</sup>H NMR (CDCl<sub>3</sub>) δ 1.85-2.00 (m, 8H, cyclopent.), 2.24 (s, 3H, CH<sub>3</sub>), 3.84 (s,

2H, -CH<sub>2</sub>-Ph), 3.87 (s, 3H, OCH<sub>3</sub>), 4.75-4.80 (m, 1H, cyclopent.), 6.69 (s, 1H, pyridaz.), 6.75-6.80 (m, 2H, Ar), 6.85-6.90 (m, 1H, Ar), 11.20 (exch br s, 1H, NH).

**6-Methyl-4-(3-(pyrimidin-5-yl)benzyl)pyridazin-3(2H)-one (40g).** Yield = 54 %; mp = 244-246 °C (EtOH). <sup>1</sup>H NMR (DMSO-d<sub>6</sub>) δ 2.19 (s, 3H, CH<sub>3</sub>), 3.83 (s, 2H, CH<sub>2</sub>-Ph), 7.13 (s, 1H, pyridaz.), 7.45 (d, 2H, Ar, *J* = 8.4 Hz), 7.76 (d, 2H, Ar, *J* = 8.4 Hz), 9.14 (s, 2H, pyrimidine), 9.18 (s, 1H, pyrimidine), 12.73 (exch br s, 1H, NH).

**General procedure for compounds 10a-g.** A mixture of intermediates **40a-g** (0.58 mmol), K<sub>2</sub>CO<sub>3</sub> (1.17 mmol), ethyl bromide (0.88 mmol) and anhydrous CH<sub>3</sub>CN (8 mL) was stirred at reflux for 4-6 hours about. After cooling, the solvent was evaporated and ice-cold water was added. The formed precipitate was recovered by *vacuum* filtration and the final compounds **10a-g** were purified by crystallization from ethanol.

**4-((2-Ethyl-3-oxo-6-phenyl-2,3-dihydropyridazin-4-yl)methyl)benzamide (10a).** Yield = 33 %; mp = 215-218 °C (EtOH). <sup>1</sup>H NMR (DMSO-d<sub>6</sub>) δ 1.32 (t, 3H, CH<sub>2</sub>CH<sub>3</sub>, *J* = 7.2 Hz), 3.95 (s, 2H, CH<sub>2</sub>-Ph), 4.18 (q, 2H, CH<sub>2</sub>CH<sub>3</sub>, *J* = 7.2 Hz), 7.30 (exch br s, 1H, CONH-H), 7.43 (d, 2H, Ar, *J* = 7.6 Hz), 7.45-7.50 (m, 3H, Ar), 7.81 (d, 2H, Ar, *J* = 7.2 Hz), 7.84 (d, 2H, Ar, *J* = 7.6 Hz), 7.92 (s, 2H, 1H CONH-H + 1H pyridaz.).

**2-Ethyl-6-phenyl-4-(4-(pyrimidin-5-yl)benzyl)pyridazin-3(2H)-one (10b).** Yield = 38 %; mp = 150-151 °C (EtOH). <sup>1</sup>H NMR (DMSO-d<sub>6</sub>) δ 1.33 (t, 3H, CH<sub>2</sub>CH<sub>3</sub>, *J* = 7.2 Hz), 3.98 (s, 2H, CH<sub>2</sub>-Ph), 4.18 (q, 2H, CH<sub>2</sub>CH<sub>3</sub>, *J* = 7.2 Hz), 7.45-7.55 (m, 5H, Ar), 7.76 (d, 2H, Ar, *J* = 8.0 Hz), 7.86 (d, 2H, Ar, *J* = 7.2 Hz), 8.00 (s, 1H, pyridaz.), 9.13 (s, 2H, pyrimidine), 9.17 (s, 1H, pyrimidine).

**4-(6-((2-Ethyl-3-oxo-6-phenyl-2,3-dihydropyridazin-4-yl)methyl)pyridin-2-yl)benzamide (10c).** Yield = 49 %; mp = 207-208 °C (EtOH). <sup>1</sup>H NMR (CDCl<sub>3</sub>) δ 1.47 (t, 3H, CH<sub>2</sub>CH<sub>3</sub>, *J* = 7.2 Hz), 4.28-4.38 (m, 4H, 2H -CH<sub>2</sub>-pyridine + 2H N-CH<sub>2</sub>CH<sub>3</sub>), 5.78 (exch br s, 1H, CONH-H), 6.25 (exch br s, 1H, CONH-H), 7.39-7.51 (m, 4H, 3H Ar + 1H pyridaz.), 7.69 (d, 1H, pyridine, *J* = 7.6 Hz), 7.75-7.85 (m, 4H, 2H Ar + 2H pyridine), 7.92 (d, 2H, Ar, *J* = 8.4 Hz), 8.10 (d, 2H, Ar, *J* = 8.4 Hz).

**4-(3-(Cyclopentyloxy)-4-methoxybenzyl)-2-ethyl-6-phenylpyridazin-3(2H)-one (10d).** Yield = 20 %; oil. <sup>1</sup>H NMR (CDCl<sub>3</sub>) δ 1.48 (t, 3H, CH<sub>2</sub>CH<sub>3</sub>, *J* = 7.2 Hz), 1.53-1.68 (m, 2H, cyclopent.), 1.78-2.02 (m, 6H, cyclopent.), 3.88 (s, 3H, OCH<sub>3</sub>), 3.92 (s, 2H, -CH<sub>2</sub>-Ph), 4.36 (q, 2H, CH<sub>2</sub>CH<sub>3</sub>, *J* = 7.2 Hz), 4.75-4.80 (m, 1H, cyclopent.), 6.78-6.90 (m, 3H, Ar), 7.22 (s, 1H, pyridaz.), 7.40-7.45 (m, 3H, Ar), 7.69 (d, 2H, Ar, *J* = 8.0 Hz).

**2-Ethyl-6-phenyl-4-(3-(pyridin-2-yl)benzyl)pyridazin-3(2H)-one (10e).** Yield = 68 %; mp = 134-136 °C (EtOH). <sup>1</sup>H NMR (DMSO-d<sub>6</sub>) δ 1.33 (t, 3H, CH<sub>2</sub>CH<sub>3</sub>, *J* = 6.8 Hz), 3.97 (s, 2H, CH<sub>2</sub>-Ph), 4.19 (q, 2H, CH<sub>2</sub>CH<sub>3</sub>, *J* = 6.8 Hz), 7.34 (m, 1H, pyridine), 7.41-7.57 (m, 5H, Ar), 7.86 (d, 3H, Ar, *J* = 7.2 Hz), 7.92 (s, 1H, pyridine), 7.95 (s, 1H, pyridaz.), 8.03 (d, 2H, Ar, *J* = 7.6 Hz), 8.65 (m, 1H, pyridine).

**4-(3-(Cyclopentyloxy)-4-methoxybenzyl)-2-ethyl-6-methylpyridazin-3(2H)-one (10f).** Yield = 66 %; oil. <sup>1</sup>H NMR (CDCl<sub>3</sub>) δ 1.38 (t, 3H, CH<sub>2</sub>CH<sub>3</sub>, *J* = 7.2 Hz), 1.55-1.65 (m, 2H, cyclopent.), 1.80-1.98 (m, 6H, cyclopent.), 2.23 (s, 3H, CH<sub>3</sub>), 3.82 (s, 2H, -CH<sub>2</sub>-Ph), 3.86 (s, 3H, OCH<sub>3</sub>), 4.21 (q, 2H, CH<sub>2</sub>CH<sub>3</sub>, *J* = 7.2 Hz), 4.75-4.80 (m, 1H, cyclopent.), 6.61 (s, 1H, pyridaz.), 6.75-6.80 (m, 2H, Ar), 6.85 (d, 1H, Ar, *J* = 8.0 Hz).

**2-Ethyl-6-methyl-4-(3-(pyrimidin-5-yl)benzyl)pyridazin-3(2H)-one (10g).** Yield = 44 %; mp = 148-150 °C (EtOH). <sup>1</sup>H NMR (CDCl<sub>3</sub>) δ 1.38 (t, 3H, CH<sub>2</sub>CH<sub>3</sub>, *J* = 7.2 Hz), 2.27 (s, 3H, CH<sub>3</sub>), 3.96 (s, 2H, CH<sub>2</sub>-Ph), 4.20 (q, 2H, CH<sub>2</sub>CH<sub>3</sub>, *J* = 7.2 Hz), 6.73 (s, 1H, pyridaz.), 7.43 (d, 2H, Ar, *J* = 8.4 Hz), 7.57 (d, 2H, Ar, *J* = 8.4 Hz), 8.96 (s, 2H, pyrimidine), 9.21 (s, 1H, pyrimidine).

**General procedure for compounds 11 and 12.** A suspension of intermediate **10a** or **10c** (0.54 mmol) in 5 mL of POCl<sub>3</sub> was stirred at 60-70 °C for 2h about. After cooling, ice-cold water (20 mL) was slowly added, and the precipitate was filtered under *vacuum* and washed with abundant cold-water to obtain the desired compounds **11** and **12**, which were recrystallized from ethanol.

**4-((2-Ethyl-3-oxo-6-phenyl-2,3-dihydropyridazin-4-yl)methyl)benzotrile (11).** Yield = 59 %; mp = 129-130 °C (EtOH). <sup>1</sup>H NMR (CDCl<sub>3</sub>) δ 1.47 (t, 3H, CH<sub>2</sub>CH<sub>3</sub>, *J* = 7.2 Hz), 4.05 (s, 2H, CH<sub>2</sub>-Ph), 4.33 (q, 2H, CH<sub>2</sub>CH<sub>3</sub>, *J* = 7.2 Hz), 7.34 (s, 1H, pyridaz.), 7.40-7.50 (m, 5H, Ar), 7.66 (d, 2H, Ar, *J* = 8.4 Hz), 7.72 (d, 2H, Ar, *J* = 6.8 Hz). IR ν (cm<sup>-1</sup>): 2221 (CN), 1655 (CO).

**4-(6-((2-Ethyl-3-oxo-6-phenyl-2,3-dihydropyridazin-4-yl)methyl)pyridin-2-yl)benzotrile (12).** Yield = 52 %; mp = 146-148 °C (EtOH). <sup>1</sup>H NMR (CDCl<sub>3</sub>) δ 1.47 (t, 3H, CH<sub>2</sub>CH<sub>3</sub>, *J* = 7.2 Hz), 4.26 (s, 2H, -CH<sub>2</sub>-pyridine), 4.34 (q, 2H, CH<sub>2</sub>CH<sub>3</sub>, *J* = 7.2 Hz), 7.40-7.50 (m, 4H, 3H Ar + 1H pyridaz.), 7.65-7.70 (m, 2H, pyridine), 7.76-7.82 (m, 5H, 4H Ar + 1H pyridine), 8.13 (d, 2H, Ar, *J* = 8.4 Hz). IR ν (cm<sup>-1</sup>): 2223 (CN), 1650 (CO).

**General procedure for compounds 13a-c.** 0.35 mmol of 4,6-diphenyl-isoxazol[3,4-d]pyridazin-7(6H)-one **41**<sup>27</sup> was dissolved in 0.5 mL of 1,4-dioxane in a sealed tube. 1.22 mmol of suitable amine or alcohol was added and the reaction was stirred at 90 °C for 2-3 h (for compound **13c** some drops of Et<sub>3</sub>N were added). After cooling, the solvent was evaporated and ice-cold water was added. The

formed precipitate was filtered off to obtain the desired compounds **13a-c** which were recrystallized from ethanol.

**5-Amino-6-oxo-1,3-diphenyl-N-propyl-1,6-dihydropyridazine-4-carboxamide (13a).** Yield = 58 %; mp = 162-164 °C (EtOH). <sup>1</sup>H NMR (DMSO-d<sub>6</sub>) δ 0.62 (t, 3H, CH<sub>2</sub>CH<sub>2</sub>CH<sub>3</sub>, J = 7.4 Hz), 1.21 (sest, 2H, CH<sub>2</sub>CH<sub>2</sub>CH<sub>3</sub>, J = 7.2 Hz), 3.00 (q, 2H, CH<sub>2</sub>CH<sub>2</sub>CH<sub>3</sub>, J = 6.8 Hz), 6.62 (exch br s, 2H, NH<sub>2</sub>), 7.38-7.44 (m, 4H, Ar), 7.50-7.55 (m, 4H, Ar), 7.62 (d, 2H, Ar, J = 7.6 Hz), 8.12 (t, 1H, NH, J = 5.6 Hz).

**4-Amino-2,6-diphenyl-5-(piperidine-1-carbonyl)pyridazin-3(2H)-one (13b).** Yield = 31 %; mp = 199-201 °C (EtOH). <sup>1</sup>H NMR (CDCl<sub>3</sub>) δ 1.15-1.20 (m, 1H, piperidine), 1.25-1.30 (m, 1H, piperidine), 1.30-1.40 (m, 2H, piperidine), 1.40-1.55 (m, 2H, piperidine), 2.75-2.85 (m, 1H, piperidine), 3.05-3.21 (m, 1H, piperidine), 3.50-3.55 (m, 2H, piperidine), 5.69 (exch br s, 2H, NH<sub>2</sub>), 7.38-7.45 (m, 4H, Ar), 7.50 (t, 2H, Ar, J = 7.8 Hz), 7.60-7.70 (m, 2H, Ar), 7.74 (d, 2H, Ar, J = 8.0 Hz).

**Cyclohexyl 5-amino-6-oxo-1,3-diphenyl-1,6-dihydropyridazine-4-carboxylate (13c).** Yield = 30 %; mp = 129-131 °C (EtOH). <sup>1</sup>H NMR (CDCl<sub>3</sub>) δ 0.90-1.15 (m, 3H, cyclohexane), 1.15-1.30 (m, 3H, cyclohexane), 1.40-1.50 (m, 3H, cyclohexane), 1.55-1.60 (m, 2H, cyclohexane), 4.71-4.76 (m, 1H, cyclohexane), 7.36-7.42 (m, 6H, Ar), 7.43-7.50 (m, 2H, Ar), 7.69-7.74 (m, 2H, Ar).

**4-Cyclohexyl-3-methyl-6-propylisoxazolo[3,4-d]pyridazin-7(6H)-one (43e).** A mixture of compound **42**<sup>31</sup> (0.45 mmol), K<sub>2</sub>CO<sub>3</sub> (0.90 mmol), bromopropane (2.25 mmol, added twice) and anhydrous acetone (2 mL) was warmed at 90 °C for 5 h. After cooling, the solvent was evaporated and ice cold-water was added. The suspension was extracted with ethyl acetate (3 x 10 mL), dried on sodium sulfate and evaporated to obtain the desired compound which was purified by column chromatography to remove the excess of bromopropane using cyclohexane/ethyl acetate 3:1 as eluent. Yield = 70%; mp = 160-162 °C (EtOH). <sup>1</sup>H NMR (CDCl<sub>3</sub>) δ 0.95 (t, 3H, CH<sub>2</sub>CH<sub>2</sub>CH<sub>3</sub>, J = 7.2 Hz), 1.35-1.45 (m, 6H, cC<sub>6</sub>H<sub>11</sub>), 1.80 (sest, 2H, CH<sub>2</sub>CH<sub>2</sub>CH<sub>3</sub>, J = 7.2 Hz), 1.88-1.99 (m, 4H, cC<sub>6</sub>H<sub>11</sub>), 2.83 (s, 3H, 3-CH<sub>3</sub>), 4.06 (t, 2H, CH<sub>2</sub>CH<sub>2</sub>CH<sub>3</sub>, J = 7.2 Hz).

**General procedure for compounds 44b-m.** To a solution of intermediates **43b-g**<sup>27-29</sup> (0.60 mmol) in 1.25 mL of anhydrous MeOH, 1.5 mmol of appropriate (hetero)arylaldehyde and a solution of MeONa (0.65 mmol of Na<sup>0</sup> in 1 mL of MeOH) were added. The mixture was stirred at reflux for 2-20 min about. After cooling, the precipitate was filtered off to obtain the styryl derivatives **44b-m**.

**(E)-4-Phenyl-6-propyl-3-styrylisoxazolo[3,4-d]pyridazin-7(6H)-one (44b).** Yield = 57 %; mp = 154-156 °C (EtOH). <sup>1</sup>H NMR (CDCl<sub>3</sub>) δ 1.02 (t, 3H, CH<sub>2</sub>CH<sub>2</sub>CH<sub>3</sub>, J = 7.2 Hz), 1.91 (sest, 2H,

CH<sub>2</sub>CH<sub>2</sub>CH<sub>3</sub>,  $J = 7.2$  Hz), 4.22 (t, 2H, CH<sub>2</sub>CH<sub>2</sub>CH<sub>3</sub>,  $J = 7.2$  Hz), 6.80 (d, 1H, CH=CH,  $J = 16.4$  Hz), 7.32-7.39 (m, 5H, Ar), 7.59-7.65 (m, 5H, Ar), 8.30 (d, 1H, CH=CH,  $J = 16.4$  Hz).

**(E)-6-Butyl-4-phenyl-3-styrylisoxazolo[3,4-d]pyridazin-7(6H)-one (44c).** Yield = 55%; mp = 90-92 °C (EtOH). <sup>1</sup>H NMR (CDCl<sub>3</sub>) δ 0.99 (t, 3H, CH<sub>2</sub>CH<sub>2</sub>CH<sub>2</sub>CH<sub>3</sub>,  $J = 7.2$  Hz), 1.45 (sest, 2H, CH<sub>2</sub>CH<sub>2</sub>CH<sub>2</sub>CH<sub>3</sub>,  $J = 7.2$  Hz), 1.86 (quin, 2H, CH<sub>2</sub>CH<sub>2</sub>CH<sub>2</sub>CH<sub>3</sub>,  $J = 7.2$  Hz), 4.24 (t, 2H, CH<sub>2</sub>CH<sub>2</sub>CH<sub>2</sub>CH<sub>3</sub>,  $J = 7.2$  Hz), 6.80 (d, 1H, CH=CH,  $J = 16.4$  Hz), 7.30-7.40 (m, 5H, Ar), 7.55-7.70 (m, 5H, Ar), 7.92 (d, 1H, CH=CH,  $J = 16.4$  Hz).

**(E)-6-Isopropyl-4-phenyl-3-styrylisoxazolo[3,4-d]pyridazin-7(6H)-one (44d).** Yield = 51 %; mp = 187-189 °C (EtOH). <sup>1</sup>H NMR (CDCl<sub>3</sub>) δ 1.38 (d, 6H, CH(CH<sub>3</sub>)<sub>2</sub>,  $J = 6.4$  Hz), 5.40 (m, 1H, CH(CH<sub>3</sub>)<sub>2</sub>), 6.85 (d, 1H, CH=CH,  $J = 16.4$  Hz), 7.30-7.45 (m, 5H, Ar), 7.50-7.65 (m, 7H, 5H Ar + 1H -CH=CH).

**(E)-4-Cyclohexyl-6-propyl-3-styrylisoxazolo[3,4-d]pyridazin-7(6H)-one (44e).** Yield = 60%; mp = 156-158 °C (EtOH). <sup>1</sup>H NMR (CDCl<sub>3</sub>) δ 0.98 (t, 3H, CH<sub>2</sub>CH<sub>2</sub>CH<sub>3</sub>,  $J = 7.2$  Hz), 1.35-1.55 (m, 6H, cC<sub>6</sub>H<sub>11</sub>), 1.80 (sest, 2H, CH<sub>2</sub>CH<sub>2</sub>CH<sub>3</sub>,  $J = 7.2$  Hz), 1.95-2.05 (m, 4H, cC<sub>6</sub>H<sub>11</sub>), 4.12 (t, 2H, CH<sub>2</sub>CH<sub>2</sub>CH<sub>3</sub>,  $J = 7.2$  Hz), 7.18 (d, 1H, CH=CH,  $J = 16.4$  Hz), 7.45-7.50 (m, 3H, Ar), 7.60-7.65 (m, 2H, Ar), 7.80 (d, 1H, CH=CH,  $J = 16$  Hz).

**(E)-4,6-Diphenyl-3-styrylisoxazolo[3,4-d]pyridazin-7(6H)-one (44f).** Yield = 58 %; mp = 224-225 °C (EtOH). <sup>1</sup>H NMR (CDCl<sub>3</sub>) δ 6.95 (d, 1H, CH=CH,  $J = 16.4$  Hz), 7.35-7.70 (m, 13H, Ar), 7.81-7.86 (m, 2H, Ar), 8.40 (d, 1H, CH=CH,  $J = 16.4$  Hz).

**(E)-6-Ethyl-3-(2-(naphthalen-2-yl)vinyl)-4-phenylisoxazolo[3,4-d]pyridazin-7(6H)-one (44g).** Yield = 58 %; mp = 198-200 °C (EtOH). <sup>1</sup>H NMR (CDCl<sub>3</sub>) δ 1.48 (t, 3H, CH<sub>2</sub>CH<sub>3</sub>,  $J = 7.2$  Hz), 4.34 (q, 2H, CH<sub>2</sub>CH<sub>3</sub>,  $J = 7.2$  Hz), 6.92 (d, 1H, CH=CH,  $J = 16.4$  Hz), 7.45-7.70 (m, 9H, Ar), 7.91 (t, 2H, Ar,  $J = 6.8$  Hz), 8.20 (d, 1H, Ar,  $J = 8.8$  Hz), 8.51 (d, 1H, CH=CH,  $J = 16.4$  Hz).

**(E)-4-Phenyl-6-propyl-3-(2-(thiophen-2-yl)vinyl)isoxazolo[3,4-d]pyridazin-7(6H)-one (44h).** Yield = 74 %; mp = 145-147 °C (EtOH). <sup>1</sup>H NMR (CDCl<sub>3</sub>) δ 1.03 (t, 3H, CH<sub>2</sub>CH<sub>2</sub>CH<sub>3</sub>,  $J = 7.2$  Hz), 1.94 (sest, 2H, CH<sub>2</sub>CH<sub>2</sub>CH<sub>3</sub>,  $J = 7.4$  Hz), 4.25 (t, 2H, CH<sub>2</sub>CH<sub>2</sub>CH<sub>3</sub>,  $J = 7.2$  Hz), 6.05 (d, 1H, thiophene,  $J = 16$  Hz), 6.97 (d, 1H, CH=CH,  $J = 16.4$  Hz), 7.20 (d, 1H, thiophene,  $J = 16$  Hz), 7.45 (m, 1H, thiophene), 7.50-7.65 (m, 6H, 5H Ar + 1H -CH=CH-).

**(E)-3-(2-(Naphthalen-2-yl)vinyl)-4-phenyl-6-propylisoxazolo[3,4-d]pyridazin-7(6H)-one (44i).** Yield = 42 %; mp = 182-185 °C (EtOH). <sup>1</sup>H NMR (CDCl<sub>3</sub>) δ 1.05 (t, 3H, CH<sub>2</sub>CH<sub>2</sub>CH<sub>3</sub>,  $J = 7.4$  Hz), 1.92 (sest, 2H, CH<sub>2</sub>CH<sub>2</sub>CH<sub>3</sub>,  $J = 7.4$  Hz), 4.25 (t, 2H, CH<sub>2</sub>CH<sub>2</sub>CH<sub>3</sub>,  $J = 7.4$  Hz), 6.93 (d, 1H, CH=CH,

$J = 16$  Hz), 7.45-7.70 (m, 9H, Ar), 7.88-7.93 (m, 2H, Ar), 8.20 (d, 1H, Ar,  $J = 8.4$  Hz), 8.50 (d, 1H,  $CH=CH$ ,  $J = 16$  Hz).

**(E)-4-Phenyl-6-propyl-3-(2-(pyridin-4-yl)vinyl)isoxazolo[3,4-d]pyridazin-7(6H)-one (44l).** Yield = 45 %; mp = 87-89 °C (EtOH).  $^1\text{H NMR}$  ( $\text{CDCl}_3$ )  $\delta$  1.00 (t, 3H,  $\text{CH}_2\text{CH}_2\text{CH}_3$ ,  $J = 7.2$  Hz), 1.89 (sest, 2H,  $\text{CH}_2\text{CH}_2\text{CH}_3$ ,  $J = 7.4$  Hz), 4.16 (t, 2H,  $\text{CH}_2\text{CH}_2\text{CH}_3$ ,  $J = 7.2$  Hz), 7.19 (d, 1H,  $CH=CH$ ,  $J = 16.4$  Hz), 7.30-7.70 (m, 9H, 8H Ar + 1H  $-CH=CH-$ ), 8.73 (d, 1H, Ar,  $J = 7.2$  Hz).

**(E)-4-(4-Fluorophenyl)-6-methyl-3-styrylisoxazolo[3,4-d]pyridazin-7(6H)-one (44m).** Yield = 52 %; mp = 216-218 °C (EtOH).  $^1\text{H NMR}$  ( $\text{CDCl}_3$ )  $\delta$  3.86 (s, 3H, N- $\text{CH}_3$ ), 6.78 (d, 1H,  $CH=CH$ ,  $J = 16.4$  Hz), 7.31 (d, 2H, Ar,  $J = 8.4$  Hz), 7.37-7.42 (m, 5H, Ar), 7.62-7.69 (m, 3H, 2H Ar + 1H  $-CH=CH-$ ).

**General procedure for compounds 14a-c.** To a solution of styryl derivatives **44a**<sup>31</sup>, **44b** or **44m** (0.34 mmol) in  $\text{CH}_3\text{CN}$ , 0.45 mmol of molybdenumhexacarbonyl and 3-4 drops of  $\text{H}_2\text{O}$  were added. The mixture reaction was warmed at 80 °C for 3 h. After cooling, the solvent was removed *in vacuo*, the residue was recovered with ethyl acetate and the organic phase was washed with a mixture of  $\text{H}_2\text{O}/\text{NH}_4\text{OH}$  1:1 (3 x 10 mL). After evaporation of the solvent, the final compounds **14a-c** were purified by column chromatography using cyclohexane/ethyl acetate 3:1 as eluent.

**4-Amino-5-cinnamoyl-2-methyl-6-phenylpyridazin-3(2H)-one (14a).** Yield = 65 %; mp = 135-137 °C (EtOH).  $^1\text{H NMR}$  ( $\text{CDCl}_3$ )  $\delta$  3.90 (s, 3H, N- $\text{CH}_3$ ), 6.27 (d, 1H,  $CH=CH$ ,  $J = 15.6$  Hz), 7.03 (d, 2H, Ar,  $J = 7.6$  Hz), 7.23-7.32 (m, 3H, Ar), 7.40-7.50 (m, 4H, 3H Ar + 1H  $-CH=CH-$ ), 7.54 (d, 2H, Ar,  $J = 7.6$  Hz).

**4-Amino-5-cinnamoyl-6-phenyl-2-propylpyridazin-3(2H)-one (14b).** Yield = 66 %; mp = 122-124 °C (EtOH).  $^1\text{H NMR}$  ( $\text{CDCl}_3$ )  $\delta$  1.03 (t, 3H,  $\text{CH}_2\text{CH}_2\text{CH}_3$ ,  $J = 7.2$  Hz), 1.93 (sest, 2H,  $\text{CH}_2\text{CH}_2\text{CH}_3$ ,  $J = 7.2$  Hz), 4.21 (t, 2H,  $\text{CH}_2\text{CH}_2\text{CH}_3$ ,  $J = 7.2$  Hz), 6.26 (d, 1H,  $CH=CH$ ,  $J = 15.6$  Hz), 7.02 (d, 2H, Ar,  $J = 7.2$  Hz), 7.20-7.30 (m, 3H, Ar), 7.38-7.47 (m, 4H, 3H Ar + 1H  $-CH=CH-$ ), 7.53 (d, 2H, Ar,  $J = 7.6$  Hz).

**4-Amino-5-cinnamoyl-6-(4-fluorophenyl)-2-methylpyridazin-3(2H)-one (14c).** Yield = 58 %; mp = 152-154 °C (EtOH).  $^1\text{H NMR}$  ( $\text{CDCl}_3$ )  $\delta$  3.87 (s, 3H, N- $\text{CH}_3$ ), 6.26 (d, 1H,  $CH=CH$ ,  $J = 15.6$  Hz), 6.86 (d, 2H, Ar,  $J = 6.8$  Hz), 7.07-7.20 (m, 3H, Ar), 7.25-7.35 (m, 4H, Ar), 7.49 (d, 1H,  $CH=CH$ ,  $J = 15.6$  Hz).

**General procedure for compounds 15a-l.** A suspension of intermediates **14a,b** or **44c-l** (0.15 mmol), 10% Pd/C (0.05 mmol) and ammonium formate (0.4 mmol) in absolute ethanol (1.5 mL) was

refluxed for 2 h. After cooling, the ethanol was evaporated and methylene chloride (15 mL) was added. The precipitate was removed by filtration and the solvent was recovered and evaporated to afford the desired compounds which were purified by crystallization from ethanol.

**4-Amino-2-methyl-6-phenyl-5-(3-phenylpropanoyl)pyridazin-3(2H)-one (15a).** Yield = 60 %; mp = 121-123 °C (EtOH). <sup>1</sup>H NMR (CDCl<sub>3</sub>) δ 2.32 (t, 2H, CO-CH<sub>2</sub>CH<sub>2</sub>-Ph, *J* = 7.6 Hz), 2.70 (t, 2H, CO-CH<sub>2</sub>CH<sub>2</sub>-Ph, *J* = 7.6 Hz), 3.82 (s, 3H, N-CH<sub>3</sub>), 6.82 (d, 2H, Ar, *J* = 8.0 Hz), 7.09-7.18 (m, 3H, Ar), 7.43-7.48 (m, 5H, Ar).

**4-Amino-6-phenyl-5-(3-phenylpropanoyl)-2-propylpyridazin-3(2H)-one (15b).** Yield = 75 %; mp = 103-105 °C (EtOH). <sup>1</sup>H NMR (CDCl<sub>3</sub>) δ 1.00 (t, 3H, CH<sub>2</sub>CH<sub>2</sub>CH<sub>3</sub>, *J* = 7.0 Hz), 1.88 (sest, 2H, CH<sub>2</sub>CH<sub>2</sub>CH<sub>3</sub>, *J* = 7.0 Hz), 2.31 (t, 2H, CO-CH<sub>2</sub>CH<sub>2</sub>-Ph, *J* = 7.2 Hz), 2.70 (t, 2H, CO-CH<sub>2</sub>CH<sub>2</sub>-Ph, *J* = 7.4 Hz), 4.15 (t, 2H, CH<sub>2</sub>CH<sub>2</sub>CH<sub>3</sub>, *J* = 7.0 Hz), 6.82 (d, 2H, Ar, *J* = 7.2 Hz), 7.09-7.17 (m, 3H, Ar), 7.42-7.50 (m, 5H, Ar).

**4-Amino-2-butyl-6-phenyl-5-(3-phenylpropanoyl)pyridazin-3(2H)-one (15c).** Yield = 58 %; mp = 80-82 °C (EtOH). <sup>1</sup>H NMR (CDCl<sub>3</sub>) δ 0.99 (t, 3H, CH<sub>2</sub>CH<sub>2</sub>CH<sub>2</sub>CH<sub>3</sub>, *J* = 7.2 Hz), 1.43 (sest, 2H, CH<sub>2</sub>CH<sub>2</sub>CH<sub>2</sub>CH<sub>3</sub>, *J* = 7.6 Hz), 1.85 (quin, 2H, CH<sub>2</sub>CH<sub>2</sub>CH<sub>2</sub>CH<sub>3</sub>, *J* = 7.6 Hz), 2.33 (t, 2H, CO-CH<sub>2</sub>CH<sub>2</sub>-Ph, *J* = 7.2 Hz), 2.71 (t, 2H, CO-CH<sub>2</sub>CH<sub>2</sub>-Ph, *J* = 7.6 Hz), 4.20 (t, 2H, CH<sub>2</sub>CH<sub>2</sub>CH<sub>2</sub>CH<sub>3</sub>, *J* = 7.4 Hz), 6.83 (d, 2H, Ar, *J* = 6.8 Hz), 7.10-7.20 (m, 3H, Ar), 7.44-7.50 (m, 5H, Ar).

**4-Amino-2-isopropyl-6-phenyl-5-(3-phenylpropanoyl)pyridazin-3(2H)-one (15d).** Yield = 55 %; mp = 90-93 °C (EtOH). <sup>1</sup>H NMR (CDCl<sub>3</sub>) δ 1.38 (d, 6H, CH(CH<sub>3</sub>)<sub>2</sub>, *J* = 6.4 Hz), 2.33 (t, 2H, CO-CH<sub>2</sub>CH<sub>2</sub>-Ph, *J* = 7.2 Hz), 2.69 (t, 2H, CO-CH<sub>2</sub>CH<sub>2</sub>-Ph, *J* = 7.2 Hz), 5.20-5.30 (m, 1H, CH(CH<sub>3</sub>)<sub>2</sub>), 6.80 (d, 2H, Ar, *J* = 6.8 Hz), 7.10-7.15 (m, 2H, Ar), 7.20-7.25 (m, 1H, Ar), 7.40-7.50 (m, 5H, Ar).

**4-Amino-6-cyclohexyl-5-(3-phenylpropanoyl)-2-propylpyridazin-3(2H)-one (15e).** Yield = 60%; mp = 114-116 °C (EtOH). <sup>1</sup>H NMR (CDCl<sub>3</sub>) δ 0.96 (t, 3H, CH<sub>2</sub>CH<sub>2</sub>CH<sub>3</sub>, *J* = 7.6 Hz), 1.25-1.35 (m, 2H, cC<sub>6</sub>H<sub>11</sub>), 1.55-1.60 (m, 2H, cC<sub>6</sub>H<sub>11</sub>), 1.76-1.90 (m, 8H, 2H CH<sub>2</sub>CH<sub>2</sub>CH<sub>3</sub> + 6H cC<sub>6</sub>H<sub>11</sub>), 3.05-3.10 (m, 4H, CO-CH<sub>2</sub>CH<sub>2</sub>-Ph), 4.07 (t, 2H, CH<sub>2</sub>CH<sub>2</sub>CH<sub>3</sub>, *J* = 7.2 Hz), 7.20-7.25 (m, 3H, Ar), 7.30-7.35 (m, 2H, Ar).

**4-Amino-2,6-diphenyl-5-(3-phenylpropanoyl)pyridazin-3(2H)-one (15f).** Yield = 52 %; oil. <sup>1</sup>H NMR (CDCl<sub>3</sub>) δ 2.41 (t, 2H, CO-CH<sub>2</sub>CH<sub>2</sub>-Ph, *J* = 8.0 Hz), 2.76 (t, 2H, CO-CH<sub>2</sub>CH<sub>2</sub>-Ph, *J* = 8.0 Hz), 6.88 (d, 2H, Ar, *J* = 7.2 Hz), 7.15-7.20 (m, 1H, Ar), 7.40-7.60 (m, 10H, Ar), 7.71 (d, 2H, Ar, *J* = 7.2 Hz).

**4-Amino-2-ethyl-5-(3-(naphthalen-1-yl)propanoyl)-6-phenylpyridazin-3(2H)-one (15g).** Yield = 55 %; oil. <sup>1</sup>H NMR (CDCl<sub>3</sub>) δ 1.40 (t, 3H, CH<sub>2</sub>CH<sub>3</sub>, *J* = 7.2 Hz), 2.50 (t, 2H, CO-CH<sub>2</sub>CH<sub>2</sub>-Ph, *J* = 8.0 Hz), 3.19 (t, 2H, CO-CH<sub>2</sub>CH<sub>2</sub>-Ph, *J* = 8.0 Hz), 4.22 (q, 2H, CH<sub>2</sub>CH<sub>3</sub>, *J* = 7.2 Hz), 6.97 (d, 1H, Ar, *J* = 6.8 Hz), 7.26 (d, 1H, Ar, *J* = 8.0 Hz), 7.35-7.50 (m, 7H, Ar), 7.55-7.65 (m, 2H, Ar), 7.80 (d, 1H, Ar, *J* = 8.0 Hz).

**4-Amino-6-phenyl-2-propyl-5-(3-(thiophen-2-yl)propanoyl)pyridazin-3(2H)-one (15h).** Yield = 50 %; mp = 103-105 °C (EtOH). <sup>1</sup>H NMR (CDCl<sub>3</sub>) δ 1.01 (t, 3H, CH<sub>2</sub>CH<sub>2</sub>CH<sub>3</sub>, *J* = 7.2 Hz), 1.88-1.93 (m, 2H, CH<sub>2</sub>CH<sub>2</sub>CH<sub>3</sub>), 2.36 (t, 2H, CO-CH<sub>2</sub>CH<sub>2</sub>-Ph, *J* = 7.2 Hz), 2.95 (t, 2H, CO-CH<sub>2</sub>CH<sub>2</sub>-Ph, *J* = 7.2 Hz), 4.18 (m, 2H, CH<sub>2</sub>CH<sub>2</sub>CH<sub>3</sub>), 6.49 (ds, 1H, thiophene, *J* = 3.2 Hz), 6.80 (dd, 1H, thiophene, *J* = 5.2 Hz and *J* = 3.2 Hz), 7.03 (d, 1H, thiophene, *J* = 4.8 Hz), 7.40-7.50 (m, 5H, Ar).

**4-Amino-5-(3-(naphthalen-1-yl)propanoyl)-6-phenyl-2-propylpyridazin-3(2H)-one (15i).** Yield = 80 %; oil. <sup>1</sup>H NMR (CDCl<sub>3</sub>) δ 0.99 (t, 3H, CH<sub>2</sub>CH<sub>2</sub>CH<sub>3</sub>, *J* = 7.4 Hz), 1.85 (sest, 2H, CH<sub>2</sub>CH<sub>2</sub>CH<sub>3</sub>, *J* = 7.4 Hz), 2.50 (t, 2H, CO-CH<sub>2</sub>CH<sub>2</sub>-Ph, *J* = 7.8 Hz), 3.19 (t, 2H, CO-CH<sub>2</sub>CH<sub>2</sub>-Ph, *J* = 7.8 Hz), 4.14 (q, 2H, CH<sub>2</sub>CH<sub>2</sub>CH<sub>3</sub>, *J* = 7.2 Hz), 6.97 (d, 1H, Ar, *J* = 7.2 Hz), 7.27 (t, 1H, Ar, *J* = 7.4 Hz), 7.40-7.50 (m, 7H, Ar), 7.59 (d, 1H, Ar, *J* = 8.0 Hz), 7.65 (d, 1H, Ar, *J* = 8.4 Hz), 7.81 (d, 1H, Ar, *J* = 8.0 Hz).

**4-Amino-6-phenyl-2-propyl-5-(3-(pyridin-4-yl)propanoyl)pyridazin-3(2H)-one (15l).** Yield = 50 %; oil. <sup>1</sup>H NMR (CDCl<sub>3</sub>) δ 1.00 (t, 3H, CH<sub>2</sub>CH<sub>2</sub>CH<sub>3</sub>, *J* = 7.4 Hz), 1.89 (sest, 2H, CH<sub>2</sub>CH<sub>2</sub>CH<sub>3</sub>, *J* = 7.2 Hz), 2.39 (t, 2H, CO-CH<sub>2</sub>CH<sub>2</sub>-Ph, *J* = 7.2 Hz), 2.89 (t, 2H, CO-CH<sub>2</sub>CH<sub>2</sub>-Ph, *J* = 7.2 Hz), 4.16 (t, 2H, CH<sub>2</sub>CH<sub>2</sub>CH<sub>3</sub>, *J* = 7.6 Hz), 7.21 (d, 2H, pyridine, *J* = 5.6 Hz), 7.41-7.51 (m, 5H, Ar), 8.53 (d, 2H, pyridine, *J* = 5.2 Hz).

**4-(4-Fluorophenyl)-3-methyl-6-phenylisoxazolo[3,4-d]pyridazin-7(6H)-one (46b).** A suspension of intermediate **45**<sup>32</sup> (2.89 mmol), phenyl hydrazine (5.8 mmol) and an excess of PPA (7 g) in 2.5 mL of absolute ethanol was heated at 80-90 °C for 1 h and 30 min. After cooling, the ethanol was evaporated and ice-cold water (15 mL) was added. The precipitate was recovered by filtration to obtain a yellow solid which resulted to be pure at the TLC. Yield = 60 %; mp = 175-178 °C (EtOH). <sup>1</sup>H NMR (CDCl<sub>3</sub>) δ 2.62 (s, 3H, CH<sub>3</sub>), 7.22-7.28 (m, 3H, Ar), 7.39-7.45 (m, 2H Ar), 7.49-7.60 (m, 4H, Ar).

**5-Acetyl-4-amino-6-(4-fluorophenyl)-2-phenylpyridazin-3(2H)-one (47b).** Compound **47b** was obtained following the same procedure used for the synthesis of compounds **15a-l**. After cooling, the precipitate was removed by gravity filtration and the organic phase was recovered and evaporated to obtain a white-yellow solid which resulted to be pure at the TLC. Yield = 76 %; mp = 160-163 °C



(EtOH).  $^1\text{H NMR}$  ( $\text{CDCl}_3$ )  $\delta$  1.88 (s, 3H,  $\text{CH}_3$ ), 7.17 (t, 2H, Ar,  $J = 7.6$  Hz), 7.41 (t, 1H, Ar,  $J = 8.0$  Hz), 7.48-7.53 (m, 4H, Ar), 7.72 (d, 2H, Ar,  $J = 7.6$  Hz). IR  $\nu$  ( $\text{cm}^{-1}$ ): 3398-3283 ( $\text{NH}_2$ ), 1646 (CO), 1595 (CO).

**General procedure for compounds 16a,b.** In a sealed tube, 0.62 mmol of intermediates **47a,b** (**47a**<sup>27</sup>) and 17.68 mmol of HBr 48% were heated at 130 °C for 2 h. After cooling, the mixture was transferred to a balloon, diluted with ice-cold water (15 mL) and basified with NaOH 6N. The suspension was extracted with ethyl acetate (3 x 15 mL), dried on sodium sulfate and evaporated to obtain the desired compounds which were purified by crystallization from ethanol.

**4-Amino-2,6-diphenylpyridazin-3(2H)-one (16a).** Yield = 69 %; mp = 216-218 °C (EtOH).  $^1\text{H NMR}$  ( $\text{CDCl}_3$ )  $\delta$  6.75 (s, 1H, pyridazinone), 7.45-7.55 (m, 5H, Ar), 7.72-7.80 (m, 5H, Ar). IR  $\nu$  ( $\text{cm}^{-1}$ ): 3429-3315 ( $\text{NH}_2$ ), 1615 (CO).

**4-Amino-6-(4-fluorophenyl)-2-phenylpyridazin-3(2H)-one (16b).** Yield = 71 %; mp = 167-169 °C (EtOH).  $^1\text{H NMR}$  ( $\text{CDCl}_3$ )  $\delta$  6.76 (s, 1H, pyridazinone), 7.13 (t, 2H, Ar,  $J = 8.6$  Hz), 7.41 (t, 1H, Ar,  $J = 8.0$  Hz), 7.51 (t, 2H, Ar,  $J = 7.6$  Hz), 7.72 (d, 2H, Ar,  $J = 7.6$  Hz), 7.77-7.81 (m, 2H, Ar). IR  $\nu$  ( $\text{cm}^{-1}$ ): 3458-3317 ( $\text{NH}_2$ ), 1612 (CO).

**General procedure for compounds 17a-c.** A mixture of **16a,b** (0.18 mmol), suitable anhydride (6.03 mmol) and 1.5 mL of pyridine was warmed in a sealed tube at 140 °C for 3-5 h. After cooling, the mixture was transferred to a balloon and ice-cold water (15 mL) was added. The mixture was stirred for 1 h about in order to hydrolyze the excess of anhydride. The precipitate formed was recovered by *vacuum* filtration to obtain the desired compounds **17a-c** which were purified by crystallization from ethanol.

**N-(3-Oxo-2,6-diphenyl-2,3-dihydropyridazin-4-yl)pentanamide (17a).** Yield = 50 %; mp = 120-123 °C (EtOH).  $^1\text{H NMR}$  ( $\text{CDCl}_3$ )  $\delta$  1.00 (t, 3H,  $\text{CH}_2\text{CH}_2\text{CH}_2\text{CH}_3$ ,  $J = 7.6$  Hz), 1.46 (sest, 2H,  $\text{CH}_2\text{CH}_2\text{CH}_2\text{CH}_3$ ,  $J = 7.4$  Hz), 1.77 (quin, 2H,  $\text{CH}_2\text{CH}_2\text{CH}_2\text{CH}_3$ ,  $J = 7.6$  Hz), 2.53 (t, 2H,  $\text{CH}_2\text{CH}_2\text{CH}_2\text{CH}_3$ ,  $J = 7.4$  Hz), 7.43-7.60 (m, 6H, Ar), 7.73 (d, 2H, Ar,  $J = 7.6$  Hz), 7.90 (dd, 2H, Ar,  $J = 1.8$  Hz and  $J = 7.4$  Hz), 8.74 (exch br s, 1H, NH), 8.77 (s, 1H, pyridazinone).

**N-(3-Oxo-2,6-diphenyl-2,3-dihydropyridazin-4-yl)isobutyramide (17b).** Yield = 55 %; mp = 167-168 °C (EtOH).  $^1\text{H NMR}$  ( $\text{CDCl}_3$ )  $\delta$  1.32 (d, 6H,  $\text{CH}(\text{CH}_3)_2$ ,  $J = 6.8$  Hz), 2.71 (quin, 1H,  $\text{CH}(\text{CH}_3)_2$ ,  $J = 6.8$  Hz), 7.43-7.48 (m, 4H, Ar), 7.54 (t, 2H, Ar,  $J = 7.2$  Hz), 7.73 (d, 2H, Ar,  $J = 8.0$  Hz), 7.91 (d, 2H, Ar,  $J = 6.8$  Hz), 8.78 (s, 1H, pyridazinone), 8.82 (exch br s, 1H, NH).

*N*-(6-(4-Fluorophenyl)-3-oxo-2-phenyl-2,3-dihydropyridazin-4-yl)isobutyramide (**17c**). Yield = 48 %; mp = 169-170 °C (EtOH). <sup>1</sup>H NMR (CDCl<sub>3</sub>) δ 1.32 (d, 6H, CH(CH<sub>3</sub>)<sub>2</sub>, *J* = 6.8 Hz), 2.70 (quin, 1H, CH(CH<sub>3</sub>)<sub>2</sub>, *J* = 6.8 Hz), 7.15 (t, 2H, Ar, *J* = 8.4 Hz), 7.46 (t, 1H, Ar, *J* = 7.4 Hz), 7.54 (t, 2H, Ar, *J* = 7.8 Hz), 7.71 (d, 2H, Ar, *J* = 8.0 Hz), 7.86-7.91 (m, 2H, Ar), 8.74 (s, 1H, pyridazinone), 8.82 (exch br s, 1H, NH). LC-MS: 352.18 [M+H]<sup>+</sup>.

**5-Amino-N-(tert-butyl)-6-oxo-3-phenyl-1,6-dihydropyridazine-4-carboxamide (49)**. A mixture of compound **48**<sup>27</sup> (0.94 mmol) and *tert*-butylamine (2.85 mmol) in 2 mL of anhydrous 1,4-dioxane was warmed in a sealed tube at 80-90 °C for 2 h. After cooling, the mixture was transferred to a balloon and the solvent was evaporated. Ice-cold water (15 mL) was added and the light brown precipitate was filtered off by suction to obtain the desired compound **49**. Yield = 45 %; mp = 229-233 °C (EtOH). <sup>1</sup>H NMR (DMSO-d<sub>6</sub>) δ 1.08 (s, 9H, C(CH<sub>3</sub>)<sub>3</sub>), 6.22 (exch br s, 2H, NH<sub>2</sub>), 7.37-7.45 (m, 5H, Ar), 12.79 (exch br s, 1H, NH pyrid.).

**General procedure for compounds 18 and 20**. A mixture of compounds **49** (for **18**) or **19** (for **20**) (0.24 mmol), K<sub>2</sub>CO<sub>3</sub> (0.50 mmol), benzyl chloride (0.30 mmol), and anhydrous acetone (1.5 mL) was stirred at reflux for 2 h. After cooling, the solvent was evaporated and ice-cold water (10 mL) was added. The suspension was extracted with ethyl acetate (3 x 15 mL), dried on sodium sulfate and evaporated to obtain the desired compounds which were purified by crystallization from ethanol for **18**) or methanol (for **20**).

**5-Amino-1-benzyl-N-(tert-butyl)-6-oxo-3-phenyl-1,6-dihydropyridazine-4-carboxamide (18)**. Yield = 54 %; mp = 168-169 °C (EtOH). <sup>1</sup>H NMR (CDCl<sub>3</sub>) δ 1.06 (s, 9H, C(CH<sub>3</sub>)<sub>3</sub>), 4.81 (exch br s, 1H, NHCO), 5.37 (s, 2H, CH<sub>2</sub>-Ph), 7.30-7.38 (m, 3H, Ar), 7.45-7.55 (m, 7H, Ar). LC-MS: 377.27 [M+H]<sup>+</sup>.

**Benzyl 5-amino-1-benzyl-6-oxo-3-phenyl-1,6-dihydropyridazine-4-carboxylate (20)**. Yield = 47 %; mp = 115-116 °C (MeOH). <sup>1</sup>H NMR (CDCl<sub>3</sub>) δ 4.96 (s, 2H, O-CH<sub>2</sub>-Ph), 5.34 (s, 2H, N-CH<sub>2</sub>-Ph), 6.78 (d, 2H, Ar, *J* = 7.6 Hz), 7.17-7.24 (m, 3H, Ar), 7.27-7.35 (m, 8H, Ar), 7.47 (d, 2H, Ar, *J* = 7.6 Hz).

**Benzyl 5-amino-6-oxo-3-phenyl-1,6-dihydropyridazine-4-carboxylate (19)**. To a suspension of intermediate **48**<sup>27</sup> (1.41 mmol) in 1.5 mL of benzyl alcohol (14.5 mmol) in a sealed tube, 3.59 mmol of Et<sub>3</sub>N was added. The mixture reaction was warmed at 80 °C for 3 h. After cooling in ice-bath, ethanol was added, a light yellow precipitate was formed and it was filtered off by suction to obtain the desired compound. Yield = 35 %; mp = 218-220 °C (EtOH). <sup>1</sup>H NMR (DMSO-d<sub>6</sub>) δ 5.00 (s, 2H,

O-CH<sub>2</sub>-Ph), 6.87 (d, 2H, Ar, *J* = 7.6 Hz), 7.20-7.35 (m, 8H, Ar), 7.40 (exch br s, 2H, NH<sub>2</sub>), 12.91 (exch br s, 1H, NH). IR  $\nu$  (cm<sup>-1</sup>): 3451-3327 (NH<sub>2</sub>), 1687 (CO), 1658 (CO).

**General procedure for compounds 21a-e.** Et<sub>3</sub>N (1.14 mmol) was added to a cooled (-5 °C) and stirred solution of intermediate **50a,b**<sup>33,34</sup> (0.33 mmol) in anhydrous tetrahydrofuran (2 mL). After 30 min, the mixture was allowed to warm up to 0 °C and ethyl chloroformate (0.36 mmol) was added. After 1 h, the suitable amine (0.69 mmol) was added. The reaction was carried out at room temperature for 12 h. The mixture was then concentrated *in vacuo*, diluted with cold water (10-15 mL) and extracted with CH<sub>2</sub>Cl<sub>2</sub> (3 x 15 mL). The organic phase was dried on sodium sulphate and the solvent was evaporated to afford final compounds **21a-e** which were purified by flash column chromatography using cyclohexane/ethyl acetate 1:1 (for **21a-c**) or 2:1 (for **21d,e**) as eluents.

**2-(6-Oxo-3,4-diphenylpyridazin-1(6H)-yl)-N-propylacetamide (21a).** Yield = 35 %; mp = 136-137 °C (EtOH). <sup>1</sup>H NMR (CDCl<sub>3</sub>)  $\delta$  0.94 (t, 3H, CH<sub>2</sub>CH<sub>2</sub>CH<sub>3</sub>, *J* = 7.4 Hz), 1.57 (sext, 2H, CH<sub>2</sub>CH<sub>2</sub>CH<sub>3</sub>, *J* = 7.2 Hz), 3.28 (q, 2H, CH<sub>2</sub>CH<sub>2</sub>CH<sub>3</sub>, *J* = 7.0 Hz), 4.93 (s, 2H, NCH<sub>2</sub>CO), 6.47 (exch br s, 1H, NHCO), 7.00-7.40 (m, 11H, 10H Ar + 1H pyridazinone).

**N-Isopropyl-2-(6-oxo-3,4-diphenylpyridazin-1(6H)-yl)acetamide (21b).** Yield = 44 %; mp = 138-139 °C (EtOH). <sup>1</sup>H NMR (CDCl<sub>3</sub>)  $\delta$  1.20 (d, 6H, CH(CH<sub>3</sub>)<sub>2</sub>, *J* = 6.8 Hz), 4.12 (sext, 1H, CH(CH<sub>3</sub>)<sub>2</sub>, *J* = 6.8 Hz), 4.88 (s, 2H, NCH<sub>2</sub>CO), 6.22 (exch br s, 1H, NHCO), 7.00 (s, 1H, pyridazinone), 7.05-7.17 (m, 4H, Ar), 7.30-7.40 (m, 6H, Ar).

**N-Cyclopentyl-2-(6-oxo-3,4-diphenylpyridazin-1(6H)-yl)acetamide (21c).** Yield = 65%; mp = 148-150 °C (EtOH). <sup>1</sup>H NMR (CDCl<sub>3</sub>)  $\delta$  1.40-1.50 (m, 2H, cC<sub>5</sub>H<sub>9</sub>), 1.53-1.73 (m, 3H, cC<sub>5</sub>H<sub>9</sub>), 1.95-2.08 (m, 3H, cC<sub>5</sub>H<sub>9</sub>), 4.20-4.30 (m, 1H, CH cC<sub>5</sub>H<sub>9</sub>), 4.89 (s, 2H, NCH<sub>2</sub>CO), 6.50 (exch br s, 1H, NHCO), 7.00 (s, 1H, pyridazinone), 7.05-7.18 (m, 5H, Ar), 7.20-7.40 (m, 5H, Ar).

**2-(6-Oxo-3,5-diphenylpyridazin-1(6H)-yl)-N-propylacetamide (21d).** Yield = 22 %; mp = 168-169 °C (EtOH). <sup>1</sup>H NMR (CDCl<sub>3</sub>)  $\delta$  0.92 (t, 3H, CH<sub>2</sub>CH<sub>2</sub>CH<sub>3</sub>, *J* = 7.4 Hz), 1.57 (sext, 2H, CH<sub>2</sub>CH<sub>2</sub>CH<sub>3</sub>, *J* = 7.4 Hz), 3.27 (q, 2H, CH<sub>2</sub>CH<sub>2</sub>CH<sub>3</sub>, *J* = 6.8 Hz), 5.00 (s, 2H, NCH<sub>2</sub>CO), 6.48 (exch br s, 1H, NHCO), 7.48-7.55 (m, 6H, 5H Ar + 1H pyridazinone), 7.84-7.90 (m, 5H, Ar).

**N-Isopropyl-2-(6-oxo-3,5-diphenylpyridazin-1(6H)-yl)acetamide (21e).** Yield = 34 %; mp = 198-200 °C (EtOH). <sup>1</sup>H NMR (CDCl<sub>3</sub>)  $\delta$  1.18 (d, 6H, CH(CH<sub>3</sub>)<sub>2</sub>, *J* = 6.8 Hz), 4.12 (sext, 1H, CH(CH<sub>3</sub>)<sub>2</sub>, *J* = 6.8 Hz), 4.96 (s, 2H, NCH<sub>2</sub>CO), 6.26 (exch br s, 1H, NHCO), 7.46-7.51 (m, 6H, 5H Ar + 1H pyridazinone), 7.84-7.90 (m, 5H, Ar).

### 3. Experimental Details - Molecular modelling

**Table S1.** PharmMapper result for molecule **1a**.

|    | PDB ID | Target Name                                                                  | Fit Score | Normalized Fit Score |
|----|--------|------------------------------------------------------------------------------|-----------|----------------------|
| 1  | 1LFG   | Lactotransferrin                                                             | 2.98      | 0.9935               |
| 2  | 2GWF   | Ubiquitin carboxyl-terminal hydrolase 8                                      | 2.977     | 0.9923               |
| 3  | 4LUR   | NONE                                                                         | 2.961     | 0.9871               |
| 4  | 3CR3   | PTS-dependent dihydroxyacetone kinase, ADP-binding subunit dhaL              | 2.929     | 0.9764               |
| 5  | 1NU9   | Prothrombin                                                                  | 3.845     | 0.769                |
| 6  | 1RF8   | Eukaryotic translation initiation factor 4E                                  | 2.996     | 0.7491               |
| 7  | 2CST   | Aspartate aminotransferase, cytoplasmic                                      | 2.992     | 0.748                |
| 8  | 1ZR4   | Transposon gamma-delta resolvase                                             | 2.992     | 0.7479               |
| 9  | 2AJ7   | Flagellar assembly factor fliW                                               | 2.991     | 0.7477               |
| 10 | M      | Transcriptional regulator, IclR family                                       | 2.981     | 0.7452               |
| 11 | 2GFP   | Multidrug resistance protein D                                               | 2.98      | 0.7451               |
| 12 | 2V0V   | Nuclear receptor subfamily 1 group D member 2                                | 2.977     | 0.7443               |
| 13 | 1IS2   | Acyl-coenzyme A oxidase 1, peroxisomal                                       | 2.976     | 0.7439               |
| 14 | 2C9O   | RuvB-like 1                                                                  | 2.975     | 0.7437               |
| 15 | 2PJW   | Class E vacuolar protein-sorting machinery protein HSE1                      | 2.963     | 0.7407               |
| 16 | 2E8X   | Geranylgeranyl pyrophosphate synthetase                                      | 2.951     | 0.7377               |
| 17 | 2AD9   | Polypyrimidine tract-binding protein 1                                       | 2.949     | 0.7372               |
| 18 | 1SSE   | AP-1-like transcription factor YAP1                                          | 2.945     | 0.7362               |
| 19 | 1S7Q   | H-2 class I histocompatibility antigen, K-B alpha chain                      | 2.945     | 0.7362               |
| 20 | 1R6R   | Genome polyprotein                                                           | 2.944     | 0.7359               |
| 21 | 1W36   | Exodeoxyribonuclease V gamma chain                                           | 2.937     | 0.7344               |
| 22 | 1UJV   | Membrane-associated guanylate kinase, WW and PDZ domain-containing protein 2 | 2.937     | 0.7342               |
| 23 | 1W1G   | 3-phosphoinositide-dependent protein kinase 1                                | 2.937     | 0.7342               |
| 24 | 2E02   | Cysteine proteinase 1, mitochondrial                                         | 2.932     | 0.7329               |
| 25 | 1CLZ   | Ig gamma-3 chain C region                                                    | 2.932     | 0.7329               |
| 26 | 1QZ2   | FK506-binding protein 4                                                      | 2.925     | 0.7313               |
| 27 | 1IG8   | Hexokinase-2                                                                 | 2.923     | 0.7308               |
| 28 | 2P0W   | Histone acetyltransferase type B catalytic subunit                           | 2.921     | 0.7302               |
| 29 | 2B6E   | Putative esterase HI1161                                                     | 2.915     | 0.7289               |
| 30 | 1PC8   | Beta-galactoside-specific lectin 4                                           | 2.91      | 0.7274               |
| 31 | 1UKF   | Cysteine protease avirulence protein avrPphB                                 | 4         | 0.6667               |
| 32 | 1S40   | Cell division control protein 13                                             | 3.915     | 0.6525               |
| 33 | 3FQD   | 5-3 exoribonuclease 2                                                        | 3.133     | 0.6266               |
| 34 | 2ZU6   | Eukaryotic initiation factor 4A-I                                            | 3.745     | 0.6241               |
| 35 | 1HM9   | Bifunctional protein glmU                                                    | 3.12      | 0.624                |
| 36 | 1X65   | Cold shock domain-containing protein E1                                      | 3.7       | 0.6167               |
| 37 | 1XJV   | Protection of telomeres protein 1                                            | 3.067     | 0.6133               |
| 38 | 2VH3   | Ranasmurfin                                                                  | 3         | 0.6                  |

|    |      |                                                  |       |        |
|----|------|--------------------------------------------------|-------|--------|
| 39 | 1PHN | C-phycoyanin alpha chain                         | 3     | 0.6    |
| 40 | 1WIN | Flotillin-2                                      | 3     | 0.6    |
| 41 | 1ZVS | Beta-2-microglobulin                             | 3     | 0.6    |
| 42 | 2P0R | Calpain-9                                        | 2.998 | 0.5996 |
| 43 | 1DUS | Protein MJ0882                                   | 3.597 | 0.5995 |
| 44 | 2FV4 | Kinetochore protein SPC25                        | 2.993 | 0.5987 |
| 45 | 1BUO | Zinc finger and BTB domain-containing protein 16 | 2.993 | 0.5985 |
| 46 | 2I15 | Uncharacterized protein MG296 homolog            | 2.99  | 0.5981 |
| 47 | 1JN5 | NTF2-related export protein 1                    | 2.988 | 0.5975 |
| 48 | 1FNC | Ferredoxin--NADP reductase, chloroplastic        | 2.987 | 0.5974 |
| 49 | 1LSH | Vitellogenin                                     | 2.985 | 0.5971 |
| 50 | 1GHS | Glucan endo-1,3-beta-glucosidase GII             | 2.982 | 0.5964 |

**Table S2.** PharmMapper result for molecule **2a**.

|    | PDB ID | Target Name                                                   | Fit Score | Normalized Fit Score |
|----|--------|---------------------------------------------------------------|-----------|----------------------|
| 1  | 4NFT   | NONE                                                          | 2.996     | 0.9986               |
| 2  | 2JQD   | Acidic leucine-rich nuclear phosphoprotein 32 family member A | 2.994     | 0.9981               |
| 3  | 2IRP   | Methylthioribulose-1-phosphate dehydratase                    | 2.994     | 0.998                |
| 4  | 1T0T   | UPF0447 protein GK3416                                        | 2.994     | 0.9979               |
| 5  | 2NQ2   | Probable ABC transporter permease protein HI1471              | 2.994     | 0.9979               |
| 6  | 1CQA   | Profilin                                                      | 2.993     | 0.9975               |
| 7  | 2VRW   | Ras-related C3 botulinum toxin substrate 1                    | 2.992     | 0.9975               |
| 8  | 1IJE   | Elongation factor 1-alpha                                     | 2.992     | 0.9975               |
| 9  | 2HDP   | E3 ubiquitin-protein ligase Mdm2                              | 2.992     | 0.9975               |
| 10 | 1GK5   | Pro-epidermal growth factor                                   | 2.992     | 0.9974               |
| 11 | 2KDD   | Borealin                                                      | 2.992     | 0.9973               |
| 12 | 3CE6   | Adenosylhomocysteinase                                        | 2.991     | 0.9969               |
| 13 | 2DGR   | RNA-binding protein MEX3D                                     | 2.99      | 0.9966               |
| 14 | 1M3S   | 3-hexulose-6-phosphate isomerase                              | 2.99      | 0.9965               |
| 15 | 1O96   | Electron transfer flavoprotein subunit beta                   | 2.989     | 0.9965               |
|    |        | Class E vacuolar protein-sorting machinery protein            |           |                      |
| 16 | 2PJW   | HSE1                                                          | 2.989     | 0.9963               |
| 17 | 3EPY   | Acyl-CoA-binding domain-containing protein 7                  | 2.989     | 0.9962               |
| 18 | 1O7D   | Lysosomal alpha-mannosidase                                   | 2.989     | 0.9962               |
| 19 | 1S68   | RNA ligase 2                                                  | 2.988     | 0.996                |
| 20 | 1VLI   | Spore coat polysaccharide biosynthesis protein spsE           | 2.988     | 0.9959               |
| 21 | 3DZ7   | S-adenosylmethionine decarboxylase proenzyme                  | 2.987     | 0.9956               |
| 22 | 2GWF   | Ubiquitin carboxyl-terminal hydrolase 8                       | 2.986     | 0.9954               |
| 23 | 1V5V   | Probable aminomethyltransferase                               | 2.986     | 0.9953               |
| 24 | 2ASF   | Uncharacterized protein Rv2074/MT2134                         | 2.986     | 0.9952               |
| 25 | 1Z0D   | Ras-related protein Rab-5C                                    | 2.985     | 0.9951               |
| 26 | 1O9Y   | Type III secretion protein hrcQb                              | 2.985     | 0.9949               |
| 27 | 2NPU   | FKBP12-rapamycin complex-associated protein                   | 2.984     | 0.9948               |
| 28 | 3DUZ   | Major envelope glycoprotein                                   | 2.984     | 0.9947               |
| 29 | 2A7S   | Probable propionyl-CoA carboxylase beta chain 5               | 2.984     | 0.9945               |

|    |      |                                                   |       |        |
|----|------|---------------------------------------------------|-------|--------|
| 30 | 2I15 | Uncharacterized protein MG296 homolog             | 2.983 | 0.9945 |
| 31 | 1QWG | Phosphosulfolactate synthase                      | 2.983 | 0.9943 |
| 32 | 1U2W | Cadmium efflux system accessory protein           | 2.983 | 0.9943 |
| 33 | 2PIH | Uncharacterized protein ymcA                      | 2.983 | 0.9942 |
| 34 | 1J1E | Troponin C, slow skeletal and cardiac muscles     | 2.981 | 0.9936 |
| 35 | 2D6F | Glutamyl-tRNA(Gln) amidotransferase subunit D     | 2.981 | 0.9935 |
| 36 | 1QZT | Phosphate acetyltransferase                       | 2.98  | 0.9934 |
| 37 | 1F3B | Glutathione S-transferase A1                      | 2.98  | 0.9932 |
| 38 | 3HZQ | Large-conductance mechanosensitive channel        | 2.979 | 0.993  |
| 39 | 2ZIW | Crossover junction endonuclease MUS81             | 2.979 | 0.993  |
| 40 | 1UKK | Osmotically inducible protein C                   | 2.975 | 0.9917 |
| 41 | 1GGZ | Calmodulin-like protein 3                         | 2.973 | 0.9912 |
| 42 | 1D4M | Genome polyprotein                                | 2.973 | 0.9908 |
| 43 | 2ZSM | Glutamate-1-semialdehyde 2,1-aminomutase          | 2.972 | 0.9908 |
| 44 | 1BDG | Hexokinase                                        | 2.971 | 0.9904 |
| 45 | 2CWX | Ribulose biphosphate carboxylase                  | 2.965 | 0.9884 |
| 46 | 2I1Y | Receptor-type tyrosine-protein phosphatase-like N | 2.965 | 0.9884 |
| 47 | 1XPP | DNA-directed RNA polymerase subunit L             | 2.965 | 0.9883 |
| 48 | 2P67 | LAO/AO transport system kinase                    | 2.964 | 0.9881 |
| 49 | 2UUU | Alkyldihydroxyacetonephosphate synthase           | 2.963 | 0.9876 |
| 50 | 1GT5 | Odorant-binding protein                           | 2.962 | 0.9874 |

**Table S3.** PharmMapper result for molecule **3a**.

|    | PDB ID | Target Name                                                                  | Fit Score | Normalized Fit Score |
|----|--------|------------------------------------------------------------------------------|-----------|----------------------|
| 1  | 3MYB   | NONE                                                                         | 2.993     | 0.7482               |
| 2  | 3B3D   | Uncharacterized oxidoreductase ytbE                                          | 2.985     | 0.7463               |
| 3  | 2NVB   | NADP-dependent alcohol dehydrogenase                                         | 2.98      | 0.745                |
| 4  | 1UWK   | Urocanate hydratase                                                          | 2.966     | 0.7416               |
| 5  | 1UJV   | Membrane-associated guanylate kinase, WW and PDZ domain-containing protein 2 | 2.963     | 0.7407               |
| 6  | 1EYB   | Homogentisate 1,2-dioxygenase                                                | 2.949     | 0.7371               |
| 7  | 2NZ2   | Argininosuccinate synthase                                                   | 2.948     | 0.737                |
| 8  | 2EBZ   | Regulator of G-protein signaling 12                                          | 2.947     | 0.7369               |
| 9  | 1U2E   | 2-hydroxy-6-oxononadienedioate/2-hydroxy-6-oxononatrienedioate hydrolase     | 2.93      | 0.7325               |
| 10 | 2CO9   | Thymocyte selection-associated high mobility group box protein TOX           | 2.92      | 0.7301               |
| 11 | 1A0J   | Trypsin-3                                                                    | 2.919     | 0.7298               |
| 12 | 2GNX   | UPF0536 protein C12orf66 homolog                                             | 2.919     | 0.7297               |
| 13 | 2DBR   | Glyoxylate reductase                                                         | 2.917     | 0.7293               |
| 14 | 1GYP   | Glyceraldehyde-3-phosphate dehydrogenase, glycosomal                         | 2.91      | 0.7275               |
| 15 | 2ZPA   | Uncharacterized protein ypfI                                                 | 2.909     | 0.7272               |
| 16 | 2ZW9   | Leucine carboxyl methyltransferase 2                                         | 2.907     | 0.7268               |
| 17 | 2PFC   | Uncharacterized protein Rv0098/MT0107                                        | 2.906     | 0.7266               |
| 18 | 3DRA   | Protein farnesyltransferase/geranylgeranyltransferase type-1 subunit alpha   | 2.903     | 0.7259               |

|    |      |                                                            |       |        |
|----|------|------------------------------------------------------------|-------|--------|
|    |      | Mitochondrial import inner membrane translocase subunit    |       |        |
| 19 | 3DXR | TIM9                                                       | 2.896 | 0.7241 |
| 20 | 1UYR | Acetyl-CoA carboxylase                                     | 2.895 | 0.7238 |
| 21 | 3FFV | Protein syd                                                | 2.883 | 0.7208 |
| 22 | 2YRV | AT-rich interactive domain-containing protein 4A           | 2.883 | 0.7208 |
| 23 | 1JL2 | Ribonuclease HI                                            | 2.882 | 0.7205 |
| 24 | 2CWX | Ribulose biphosphate carboxylase                           | 2.876 | 0.719  |
| 25 | 1TFC | Estrogen-related receptor gamma                            | 2.869 | 0.7173 |
| 26 | 1W07 | Acyl-coenzyme A oxidase 1, peroxisomal                     | 2.868 | 0.717  |
| 27 | 2AQT | Superoxide dismutase [Cu-Zn]                               | 2.86  | 0.715  |
|    |      | Induced myeloid leukemia cell differentiation protein Mcl- |       |        |
| 28 | 2ROD | 1 homolog                                                  | 2.845 | 0.7112 |
| 29 | 2RGV | Peroxide operon regulator                                  | 2.841 | 0.7102 |
| 30 | 2COP | Acyl-CoA-binding domain-containing protein 6               | 2.839 | 0.7096 |
| 31 | 1KA9 | Imidazole glycerol phosphate synthase subunit hisF         | 2.838 | 0.7096 |
| 32 | 1D2E | Elongation factor Tu, mitochondrial                        | 2.837 | 0.7092 |
| 33 | 1PN0 | Phenol 2-monooxygenase                                     | 2.828 | 0.7071 |
| 34 | 1B93 | Methylglyoxal synthase                                     | 2.827 | 0.7067 |
| 35 | 2QG3 | UPF0130 protein AF_2059                                    | 2.814 | 0.7035 |
|    |      | Delta(3,5)-Delta(2,4)-dienoyl-CoA isomerase,               |       |        |
| 36 | 2VRE | mitochondrial                                              | 2.813 | 0.7032 |
| 37 | 2I99 | Mu-crystallin homolog                                      | 2.804 | 0.7009 |
| 38 | 2P0W | Histone acetyltransferase type B catalytic subunit         | 2.799 | 0.6997 |
| 39 | 1I3A | Ribonuclease HII                                           | 2.797 | 0.6992 |
|    | 1WY  |                                                            |       |        |
| 40 | M    | Transgelin-2                                               | 2.796 | 0.699  |
| 41 | 2JZ6 | 50S ribosomal protein L28                                  | 2.787 | 0.6968 |
| 42 | 1KZF | Acyl-homoserine-lactone synthase                           | 2.78  | 0.6951 |
| 43 | 1JQK | Carbon monoxide dehydrogenase                              | 2.77  | 0.6925 |
| 44 | 2CST | Aspartate aminotransferase, cytoplasmic                    | 2.769 | 0.6924 |
| 45 | 1U94 | Protein recA                                               | 2.758 | 0.6894 |
|    |      | Zinc finger A20 and AN1 domain-containing stress-          |       |        |
| 46 | 1WFH | associated protein 4                                       | 2.75  | 0.6875 |
| 47 | 3D3L | Arachidonate 12-lipoxygenase, 12S-type                     | 3.183 | 0.6366 |
|    | 2YW  |                                                            |       |        |
| 48 | W    | Aspartate carbamoyltransferase regulatory chain            | 2.991 | 0.5983 |
| 49 | 1URJ | Major DNA-binding protein                                  | 2.985 | 0.597  |
| 50 | 1B7A | Phosphatidylethanolamine-binding protein 1                 | 2.984 | 0.5968 |

**Table S4.** PharmMapper result for molecule **5a**.

|   | PDB ID      | Target Name                             | Fit Score | Normalized Fit Score |
|---|-------------|-----------------------------------------|-----------|----------------------|
| 1 | 1VBI        | Dehydrogenase                           | 2.961     | 0.9871               |
| 2 | 3D31<br>1YA | NONE                                    | 2.996     | 0.7489               |
| 3 | A           | Aspartate aminotransferase, cytoplasmic | 2.991     | 0.7478               |
| 4 | 1J3N        | Transferase                             | 2.991     | 0.7477               |

|    |      |                                                                                        |       |        |
|----|------|----------------------------------------------------------------------------------------|-------|--------|
|    | 2DQ  |                                                                                        |       |        |
| 5  | N    | Glutamyl-tRNA(Gln) amidotransferase subunit A                                          | 2.973 | 0.7432 |
| 6  | 3BHY | Death-associated protein kinase 3                                                      | 2.971 | 0.7427 |
| 7  | 3HKI | Prothrombin                                                                            | 2.933 | 0.7332 |
| 8  | 1D06 | Sensor protein fixL                                                                    | 2.905 | 0.7262 |
| 9  | 2OWI | Regulator of G-protein signaling 18                                                    | 2.899 | 0.7246 |
| 10 | 3CA8 | Protein ydcF                                                                           | 2.894 | 0.7234 |
| 11 | 2VLD | UPF0286 protein PYRAB01260<br>Protein farnesyltransferase/geranylgeranyltransferase    | 2.887 | 0.7218 |
| 12 | 3DRA | type-1 subunit alpha                                                                   | 2.863 | 0.7157 |
| 13 | 3B8C | ATPase 2, plasma membrane-type                                                         | 2.849 | 0.7123 |
| 14 | 2NRO | Molybdopterin biosynthesis protein moeA                                                | 2.832 | 0.7079 |
| 15 | 2CR7 | Paired amphipathic helix protein Sin3b<br>Delta(3,5)-Delta(2,4)-dienoyl-CoA isomerase, | 2.824 | 0.7061 |
| 16 | 2VRE | mitochondrial                                                                          | 2.818 | 0.7046 |
| 17 | 3CPR | Dihydrodipicolinate synthase                                                           | 2.81  | 0.7026 |
| 18 | 2I15 | Uncharacterized protein MG296 homolog                                                  | 2.795 | 0.6988 |
| 19 | 1JQK | Carbon monoxide dehydrogenase                                                          | 2.794 | 0.6986 |
| 20 | 2PUJ | 2-hydroxy-6-oxo-6-phenylhexa-2,4-dienoate hydrolase                                    | 2.786 | 0.6965 |
| 21 | 1PC8 | Beta-galactoside-specific lectin 4                                                     | 2.765 | 0.6914 |
| 22 | 2GQF | Uncharacterized protein HI0933                                                         | 2.709 | 0.6771 |
| 23 | 1NF0 | Triosephosphate isomerase                                                              | 2.704 | 0.676  |
|    | 2GN  |                                                                                        |       |        |
| 24 | X    | UPF0536 protein C12orf66 homolog                                                       | 2.695 | 0.6738 |
| 25 | 1LJ0 | Cytochrome b5 type B                                                                   | 2.684 | 0.6709 |
| 26 | 1K7A | Protein C-ets-1                                                                        | 2.653 | 0.6632 |
| 27 | 2JWE | Tight junction protein ZO-1                                                            | 2.609 | 0.6522 |
| 28 | 2QFD | Probable ATP-dependent RNA helicase DDX58                                              | 2.608 | 0.6519 |
| 29 | 1U94 | Protein recA                                                                           | 2.607 | 0.6518 |
| 30 | 2JZ6 | 50S ribosomal protein L28                                                              | 2.556 | 0.639  |
| 31 | 3FFV | Protein syd                                                                            | 2.529 | 0.6323 |
| 32 | 1PN0 | Phenol 2-monooxygenase                                                                 | 2.437 | 0.6093 |
| 33 | 2Q2E | Type II DNA topoisomerase VI subunit A                                                 | 2.431 | 0.6077 |
|    | 3FM  |                                                                                        |       |        |
| 34 | O    | Nuclear pore complex protein Nup214                                                    | 2.42  | 0.6049 |
| 35 | 2AQT | Superoxide dismutase [Cu-Zn]                                                           | 2.4   | 0.6    |
| 36 | 1GGZ | Calmodulin-like protein 3                                                              | 2.998 | 0.5997 |
| 37 | 2BTY | Acetylglutamate kinase                                                                 | 2.998 | 0.5996 |
| 38 | 1NA6 | Type-2 restriction enzyme EcoRII                                                       | 2.995 | 0.5989 |
| 39 | 1FI6 | RalBP1-associated Eps domain-containing protein 1                                      | 2.995 | 0.5989 |
| 40 | 3EAP | Rho GTPase-activating protein 11A                                                      | 2.994 | 0.5989 |
| 41 | 2AY0 | Bifunctional protein putA                                                              | 2.994 | 0.5988 |
| 42 | 1SNL | Nucleobindin-1                                                                         | 2.993 | 0.5987 |
| 43 | 1RKS | Ribokinase                                                                             | 2.989 | 0.5979 |
| 44 | 1UFI | Major centromere autoantigen B                                                         | 2.983 | 0.5965 |
| 45 | 2HJS | USG-1 protein homolog                                                                  | 2.975 | 0.595  |
| 46 | 1XCB | Redox-sensing transcriptional repressor rex                                            | 2.97  | 0.594  |
| 47 | 1IVX | Phenylethylamine oxidase                                                               | 2.969 | 0.5938 |
| 48 | 3G9K | Capsule biosynthesis protein capD                                                      | 2.965 | 0.5931 |



|    |     |                                      |       |        |
|----|-----|--------------------------------------|-------|--------|
|    | 2VW |                                      |       |        |
| 49 | T   | 2-keto-3-deoxy-L-rhamnonate aldolase | 2.961 | 0.5922 |
|    | 2HH |                                      |       |        |
| 50 | K   | Reaction center protein H chain      | 2.958 | 0.5917 |

**Table S5.** PharmMapper result for molecule 7.

|    | PDB ID | Target Name                                                                                      | Fit Score | Normalized Fit Score |
|----|--------|--------------------------------------------------------------------------------------------------|-----------|----------------------|
| 1  | 4I1P   | NONE                                                                                             | 3.171     | 0.7929               |
| 2  | 2CST   | Aspartate aminotransferase, cytoplasmic                                                          | 2.981     | 0.7454               |
| 3  | 3FMO   | Nuclear pore complex protein Nup214<br>Protein farnesyltransferase/geranylgeranyltransferase     | 2.903     | 0.7257               |
| 4  | 3DRA   | type-1 subunit alpha                                                                             | 2.862     | 0.7154               |
| 5  | 1JQK   | Carbon monoxide dehydrogenase                                                                    | 2.858     | 0.7145               |
| 6  | 1PP9   | Cytochrome b-c1 complex subunit 1, mitochondrial<br>Delta(3,5)-Delta(2,4)-dienoyl-CoA isomerase, | 2.752     | 0.688                |
| 7  | 2VRE   | mitochondrial                                                                                    | 2.741     | 0.6852               |
| 8  | 2GQF   | Uncharacterized protein HI0933                                                                   | 2.702     | 0.6754               |
| 9  | 1QGK   | Importin subunit beta-1                                                                          | 2.658     | 0.6645               |
| 10 | 1PN0   | Phenol 2-monooxygenase                                                                           | 2.619     | 0.6548               |
| 11 | 1XQ1   | Tropinone reductase homolog At1g07440                                                            | 2.538     | 0.6346               |
| 12 | 2C6S   | Penton protein                                                                                   | 2.425     | 0.6062               |
|    | 2CW    |                                                                                                  |           |                      |
| 13 | X      | Ribulose biphosphate carboxylase                                                                 | 2.367     | 0.5918               |
| 14 | 1QRJ   | Gag-Pro-Pol polyprotein                                                                          | 2.361     | 0.5901               |
| 15 | 1GPM   | GMP synthase [glutamine-hydrolyzing]                                                             | 2.943     | 0.5886               |
| 16 | 1UYR   | Acetyl-CoA carboxylase                                                                           | 2.301     | 0.5754               |
| 17 | 2P1Q   | SKP1-like protein 1A                                                                             | 2.866     | 0.5732               |
| 18 | 1YIV   | Myelin P2 protein                                                                                | 4.559     | 0.5699               |
| 19 | 1FRV   | Periplasmic [NiFe] hydrogenase small subunit                                                     | 2.268     | 0.5671               |
| 20 | 1SGJ   | Citrate lyase beta subunit-like protein                                                          | 2.267     | 0.5666               |
| 21 | 2PA6   | Enolase                                                                                          | 2.266     | 0.5664               |
| 22 | 1YPF   | GMP reductase                                                                                    | 2.811     | 0.5621               |
| 23 | 1Y1U   | Signal transducer and activator of transcription 5A                                              | 2.81      | 0.5621               |
| 24 | 1R6U   | Tryptophanyl-tRNA synthetase, cytoplasmic                                                        | 2.235     | 0.5587               |
| 25 | 1I3R   | H-2 class II histocompatibility antigen, E-K alpha chain                                         | 2.788     | 0.5576               |
| 26 | 2P0R   | Calpain-9                                                                                        | 2.744     | 0.5488               |
| 27 | 2E55   | Uracil phosphoribosyltransferase                                                                 | 3.289     | 0.5482               |
| 28 | 1SPU   | Primary amine oxidase                                                                            | 3.247     | 0.5411               |
| 29 | 2QFD   | Probable ATP-dependent RNA helicase DDX58                                                        | 2.162     | 0.5405               |
| 30 | 1OXY   | Hemocyanin II                                                                                    | 3.225     | 0.5375               |
| 31 | 1HRO   | Cytochrome c2                                                                                    | 3.211     | 0.5352               |
| 32 | 1W9C   | Exportin-1                                                                                       | 2.14      | 0.5351               |
| 33 | 1B35   | Genome polyprotein                                                                               | 2.125     | 0.5313               |
|    | 1MD    | UDP-4-amino-4-deoxy-L-arabinose--oxoglutarate                                                    |           |                      |
| 34 | Z      | aminotransferase                                                                                 | 2.101     | 0.5254               |
| 35 | 1RP8   | Alpha-amylase type A isozyme                                                                     | 4.19      | 0.5238               |
| 36 | 1VLU   | Gamma-glutamyl phosphate reductase                                                               | 2.614     | 0.5229               |

|    |      |                                                             |       |        |
|----|------|-------------------------------------------------------------|-------|--------|
| 37 | 3ESW | Peptide-N(4)-(N-acetyl-beta-glucosaminyl)asparagine amidase | 2.608 | 0.5216 |
| 38 | 1PUJ | Ribosome biogenesis GTPase A                                | 3.112 | 0.5186 |
| 39 | 3G2F | Bone morphogenetic protein receptor type-2                  | 2.584 | 0.5169 |
| 40 | 1IS2 | Acyl-coenzyme A oxidase 1, peroxisomal                      | 3.098 | 0.5163 |
| 41 | 1AHS | Core protein VP7                                            | 3.097 | 0.5161 |
| 42 | M    | Methenyltetrahydromethanopterin cyclohydrolase              | 2.559 | 0.5118 |
| 43 | 1Y79 | Peptidyl-dipeptidase dcp                                    | 2.559 | 0.5117 |
| 44 | 1V5V | Probable aminomethyltransferase                             | 2.033 | 0.5083 |
| 45 | 1X62 | PDZ and LIM domain protein 1                                | 2.535 | 0.5071 |
| 46 | 1J4A | D-lactate dehydrogenase                                     | 2.534 | 0.5068 |
| 47 | 2UUU | Alkyldihydroxyacetonephosphate synthase                     | 2.022 | 0.5055 |
| 48 | 1RVV | 6,7-dimethyl-8-ribityllumazine synthase                     | 2.523 | 0.5046 |
| 49 | 1SNL | Nucleobindin-1                                              | 2.48  | 0.496  |
| 50 | 1XDO | Polyphosphate kinase                                        | 2.479 | 0.4958 |

**Table S6.** PharmMapper result for molecule 8.

|    | PDB ID | Target Name                                                                                              | Fit Score | Normalized Fit Score |
|----|--------|----------------------------------------------------------------------------------------------------------|-----------|----------------------|
| 1  | 2C9O   | RuvB-like 1                                                                                              | 3.118     | 0.7794               |
| 2  | 1DK8   | Axin-1                                                                                                   | 3.824     | 0.7647               |
| 3  | 4HNY   | NONE                                                                                                     | 3.796     | 0.7593               |
| 4  | 3F3K   | Uncharacterized protein YKR043C                                                                          | 3.404     | 0.6808               |
| 5  | 1XES   | Dihydropinosylin synthase                                                                                | 3.393     | 0.6785               |
| 6  | 1RQG   | Methionyl-tRNA synthetase                                                                                | 3.383     | 0.6766               |
| 7  | 2BTY   | Acetylglutamate kinase                                                                                   | 3.285     | 0.657                |
| 8  | 3D3L   | Arachidonate 12-lipoxygenase, 12S-type                                                                   | 3.204     | 0.6408               |
| 9  | 3CLH   | 3-dehydroquinase synthase                                                                                | 3.128     | 0.6256               |
| 10 | 2R0N   | Glutaryl-CoA dehydrogenase, mitochondrial                                                                | 3.128     | 0.6256               |
| 11 | 2HMA   | tRNA-specific 2-thiouridylase mnmA                                                                       | 3.727     | 0.6212               |
| 12 | 1H4R   | Merlin                                                                                                   | 3.712     | 0.6186               |
| 13 | 1U08   | Aminotransferase ybdL                                                                                    | 3.072     | 0.6144               |
| 14 | 1X65   | Cold shock domain-containing protein E1                                                                  | 3.681     | 0.6135               |
| 15 | 2KA5   | Putative anti-sigma factor antagonist TM_1081                                                            | 3.651     | 0.6084               |
| 16 | 3C7G   | Arabinoxylan arabinofuranohydrolase                                                                      | 3.628     | 0.6047               |
| 17 | 1LRW   | Methanol dehydrogenase subunit 1                                                                         | 3.62      | 0.6033               |
| 18 | 2BTU   | Phosphoribosylformylglycinamide cyclo-ligase                                                             | 3.618     | 0.603                |
| 19 | 1TU9   | Hypothetical protein                                                                                     | 3.611     | 0.6019               |
| 20 | 1HJ1   | Estrogen receptor beta                                                                                   | 3.603     | 0.6005               |
| 21 | 1S40   | Cell division control protein 13                                                                         | 3.554     | 0.5923               |
| 22 | 2IN5   | Uncharacterized lipoprotein gfcB                                                                         | 3.546     | 0.5909               |
| 23 | 1UKF   | Cysteine protease avirulence protein avrPphB<br>Regulator of transcription; stringent starvation protein | 3.534     | 0.589                |
| 24 | 1YY7   | A                                                                                                        | 3.51      | 0.5851               |
| 25 | 1LWD   | Isocitrate dehydrogenase [NADP], mitochondrial                                                           | 3.501     | 0.5836               |
| 26 | 2A7S   | Probable propionyl-CoA carboxylase beta chain 5                                                          | 3.495     | 0.5826               |

|    |      |                                                                                                        |       |        |
|----|------|--------------------------------------------------------------------------------------------------------|-------|--------|
| 27 | 2P4B | Sigma-E factor regulatory protein rseB                                                                 | 3.476 | 0.5794 |
| 28 | 3DL2 | Ubiquitin-conjugating enzyme E2 variant 3<br>Phosphatidylinositol-5-phosphate 4-kinase type-2<br>gamma | 3.469 | 0.5781 |
| 29 | 2GK9 | Non-structural protein 2                                                                               | 3.468 | 0.578  |
| 30 | 2GU0 | Holliday junction ATP-dependent DNA helicase ruvB                                                      | 3.444 | 0.574  |
| 31 | 1IN7 | Sodium/glucose cotransporter                                                                           | 3.442 | 0.5737 |
| 32 | 3DH4 | Enoyl-CoA hydratase, mitochondrial                                                                     | 3.424 | 0.5707 |
| 33 | 1MJ3 | Protein SCO2 homolog, mitochondrial                                                                    | 3.407 | 0.5678 |
| 34 | 2RLI | Splicing factor 1                                                                                      | 3.395 | 0.5658 |
| 35 | 1K1G | Calcineurin B-like protein 4                                                                           | 3.392 | 0.5653 |
| 36 | 1V1F | Superoxide dismutase [Fe]                                                                              | 3.368 | 0.5613 |
| 37 | 1MA1 | Cytochrome b6                                                                                          | 3.363 | 0.5605 |
| 38 | 2E74 | Beta-lactamase TEM                                                                                     | 3.352 | 0.5586 |
| 39 | 1S0W | Chromosomal replication initiator protein dnaA                                                         | 3.348 | 0.558  |
| 40 | 2HCB | Putative Holliday junction resolvase                                                                   | 3.899 | 0.557  |
| 41 | 1OVQ | Zinc finger and BTB domain-containing protein 43                                                       | 3.335 | 0.5559 |
| 42 | 2CSH | Dephospho-CoA kinase                                                                                   | 3.89  | 0.5558 |
| 43 | 2IF2 | Methionine synthase reductase, mitochondrial                                                           | 3.322 | 0.5537 |
| 44 | 2QTZ | Fatty acid-binding protein, liver                                                                      | 3.308 | 0.5514 |
| 45 | 1P6P | 5-methylthioadenosine/S-adenosylhomocysteine<br>nucleosidase                                           | 3.845 | 0.5493 |
| 46 | 3DP9 | 3-ketoacyl-CoA thiolase 2, peroxisomal                                                                 | 3.287 | 0.5479 |
| 47 | 2C7Y | Glutamate [NMDA] receptor subunit 3A                                                                   | 3.824 | 0.5462 |
| 48 | 2RC7 | Virginiamycin B lyase                                                                                  | 3.273 | 0.5455 |
| 49 | 2Z2N | Cytochrome c2                                                                                          | 3.815 | 0.545  |
| 50 | 1CO6 |                                                                                                        | 3.269 | 0.5449 |

**Table S7.** PharmMapper result for molecule **9**.

|    | PDB<br>ID | Target Name                                        | Fit<br>Score | Normalize<br>d Fit Score |
|----|-----------|----------------------------------------------------|--------------|--------------------------|
| 1  | 4UAK      | NONE                                               | 3.57         | 0.8926                   |
| 2  | 1FFT      | Ubiquinol oxidase subunit 1                        | 3.444        | 0.861                    |
| 3  | 2NRO      | Molybdopterin biosynthesis protein moeA            | 3.306        | 0.8265                   |
| 4  | 1R1T      | Transcriptional repressor smtB                     | 3.266        | 0.8165                   |
| 5  | 2OWI      | Regulator of G-protein signaling 18                | 3.204        | 0.8011                   |
| 6  | 3FQD      | 5-3 exoribonuclease 2                              | 3.943        | 0.7885                   |
| 7  | 1YED      | Ig gamma-1 chain C region secreted form            | 3.087        | 0.7718                   |
| 8  | 2F8N      | Histone H3.2                                       | 3.762        | 0.7525                   |
| 9  | 1XES      | Dihydropinosylvin synthase                         | 3.751        | 0.7502                   |
| 10 | 1DK8      | Axin-1                                             | 3.75         | 0.7501                   |
| 11 | 1X65      | Cold shock domain-containing protein E1            | 4.472        | 0.7453                   |
|    | 2YW       |                                                    |              |                          |
| 12 | W         | Aspartate carbamoyltransferase regulatory chain    | 3.689        | 0.7378                   |
| 13 | 2ES0      | Regulator of G-protein signaling 6                 | 3.665        | 0.7331                   |
| 14 | 3EXA      | tRNA Delta(2)-isopentenylpyrophosphate transferase | 3.639        | 0.7278                   |
| 15 | 1N6B      | Cytochrome P450 2C5                                | 3.62         | 0.724                    |
| 16 | 1XJV      | Protection of telomeres protein 1                  | 3.618        | 0.7236                   |

|    |      |                                                                                                                               |       |        |
|----|------|-------------------------------------------------------------------------------------------------------------------------------|-------|--------|
| 17 | 2R0N | Glutaryl-CoA dehydrogenase, mitochondrial                                                                                     | 3.593 | 0.7185 |
| 18 | 2AXX | Cytochrome b5                                                                                                                 | 3.57  | 0.714  |
| 19 | 1R8U | Cbp/p300-interacting transactivator 2                                                                                         | 3.555 | 0.7109 |
| 20 | 1VF5 | Cytochrome b6                                                                                                                 | 3.549 | 0.7097 |
| 21 | 1M1J | Fibrinogen alpha chain                                                                                                        | 3.544 | 0.7088 |
| 22 | 1S99 | Putative HMP/thiamine-binding protein ykoF                                                                                    | 3.515 | 0.7031 |
| 23 | 1RQG | Methionyl-tRNA synthetase                                                                                                     | 3.484 | 0.6967 |
| 24 | 2P0T | UPF0307 protein PSPTO_4464                                                                                                    | 3.482 | 0.6965 |
| 25 | 1GGT | Coagulation factor XIII A chain                                                                                               | 3.473 | 0.6946 |
| 26 | 3D3L | Arachidonate 12-lipoxygenase, 12S-type                                                                                        | 3.428 | 0.6856 |
| 27 | 2H08 | Ribose-phosphate pyrophosphokinase 1                                                                                          | 3.408 | 0.6815 |
| 28 | 1SFK | Genome polyprotein                                                                                                            | 3.364 | 0.6728 |
| 29 | 1ZTE | Superoxide dismutase [Mn], mitochondrial                                                                                      | 3.304 | 0.6608 |
| 30 | 3F3K | Uncharacterized protein YKR043C                                                                                               | 3.284 | 0.6569 |
| 31 | 2VOJ | Alanine dehydrogenase                                                                                                         | 3.246 | 0.6493 |
| 32 | 1WEX | Heterogeneous nuclear ribonucleoprotein L-like<br>Succinate dehydrogenase [ubiquinone] flavoprotein<br>subunit, mitochondrial | 3.24  | 0.6479 |
| 33 | 2FBW | subunit, mitochondrial                                                                                                        | 3.235 | 0.6469 |
| 34 | 1S40 | Cell division control protein 13                                                                                              | 3.864 | 0.6441 |
| 35 | 1L0V | Fumarate reductase flavoprotein subunit                                                                                       | 3.221 | 0.6441 |
| 36 | 1B0A | Bifunctional protein fold                                                                                                     | 3.212 | 0.6425 |
| 37 | 2GFP | Multidrug resistance protein D                                                                                                | 3.212 | 0.6425 |
| 38 | 3EPY | Acyl-CoA-binding domain-containing protein 7                                                                                  | 3.845 | 0.6408 |
| 39 | 2JUL | Calsenilin                                                                                                                    | 3.841 | 0.6401 |
| 40 | 2CTQ | DnaJ homolog subfamily C member 12                                                                                            | 4.477 | 0.6395 |
| 41 | 2QKD | Zinc finger protein ZPR1                                                                                                      | 3.833 | 0.6389 |
| 42 | 2QBY | Cell division control protein 6 homolog 1<br>Putative multidrug export ATP-binding/permease protein                           | 3.16  | 0.6321 |
| 43 | 2HYD | SAV1866                                                                                                                       | 3.773 | 0.6289 |
| 44 | 3DF0 | Calpain-2 catalytic subunit<br>Short-chain specific acyl-CoA dehydrogenase,<br>mitochondrial                                  | 3.142 | 0.6283 |
| 45 | 2VIG | mitochondrial                                                                                                                 | 3.14  | 0.6279 |
| 46 | 3IBV | Exportin-T                                                                                                                    | 3.131 | 0.6262 |
| 47 | 1NSH | Protein S100-A11                                                                                                              | 3.123 | 0.6247 |
| 48 | 2GK9 | Phosphatidylinositol-5-phosphate 4-kinase type-2 gamma                                                                        | 3.745 | 0.6242 |
| 49 | 1YF6 | Reaction center protein H chain                                                                                               | 3.121 | 0.6241 |
| 50 | 2AYN | Ubiquitin carboxyl-terminal hydrolase 14                                                                                      | 3.116 | 0.6232 |

**Table S8.** PharmMapper result for molecule **10b**.

|   | PDB<br>ID | Target Name                             | Fit<br>Score | Normalize<br>d Fit Score |
|---|-----------|-----------------------------------------|--------------|--------------------------|
| 1 | 1VBI      | Dehydrogenase                           | 2.944        | 0.9812                   |
| 2 | 3REO      | NONE                                    | 2.941        | 0.9805                   |
| 3 | 1UKK      | Osmotically inducible protein C         | 2.926        | 0.9752                   |
| 4 | 2GWF      | Ubiquitin carboxyl-terminal hydrolase 8 | 2.912        | 0.9707                   |
| 5 | 2I15      | Uncharacterized protein MG296 homolog   | 2.899        | 0.9665                   |

|    |      |                                                                                               |       |        |
|----|------|-----------------------------------------------------------------------------------------------|-------|--------|
| 6  | 2GZA | Type IV secretion system protein virB11                                                       | 2.881 | 0.9604 |
| 7  | 2CTK | Vigilin                                                                                       | 2.854 | 0.9513 |
| 8  | 3B8C | ATPase 2, plasma membrane-type                                                                | 2.998 | 0.7495 |
| 9  | 2CST | Aspartate aminotransferase, cytoplasmic                                                       | 2.996 | 0.7489 |
| 10 | 1D06 | Sensor protein fixL                                                                           | 2.99  | 0.7476 |
| 11 | 2CR7 | Paired amphipathic helix protein Sin3b                                                        | 2.987 | 0.7469 |
| 12 | 2DQN | Glutamyl-tRNA(Gln) amidotransferase subunit A                                                 | 2.986 | 0.7465 |
| 13 | 1LJ0 | Cytochrome b5 type B                                                                          | 2.984 | 0.7461 |
| 14 | 3BHY | Death-associated protein kinase 3                                                             | 2.976 | 0.744  |
| 15 | 2VRE | Delta(3,5)-Delta(2,4)-dienoyl-CoA isomerase, mitochondrial                                    | 2.974 | 0.7435 |
| 16 | 2OWI | Regulator of G-protein signaling 18                                                           | 2.966 | 0.7414 |
| 17 | 2NRO | Molybdopterin biosynthesis protein moeA                                                       | 2.957 | 0.7392 |
| 18 | 3HKI | Prothrombin                                                                                   | 2.954 | 0.7384 |
| 19 | 1P35 | Early 35 kDa protein                                                                          | 2.952 | 0.7381 |
| 20 | 1Y89 | DevB protein                                                                                  | 2.945 | 0.7362 |
| 21 | 1J3N | Transferase                                                                                   | 2.942 | 0.7355 |
| 22 | 2HGK | Uncharacterized protein yqcC                                                                  | 2.93  | 0.7326 |
| 23 | 3EMJ | Inorganic pyrophosphatase                                                                     | 2.929 | 0.7323 |
| 24 | 2V0V | Nuclear receptor subfamily 1 group D member 2                                                 | 2.929 | 0.7322 |
| 25 | 1LSH | Vitellogenin                                                                                  | 2.928 | 0.7319 |
| 26 | M    | Transcriptional regulator, IclR family<br>Centromere DNA-binding protein complex CBF3 subunit | 2.927 | 0.7318 |
| 27 | 2VEQ | B                                                                                             | 2.919 | 0.7298 |
| 28 | 1KU5 | Archaeal histone A                                                                            | 2.919 | 0.7297 |
| 29 | 1A6Z | Hereditary hemochromatosis protein                                                            | 2.915 | 0.7288 |
| 30 | 2E02 | Cysteine proteinase 1, mitochondrial                                                          | 2.915 | 0.7287 |
| 31 | 2GFP | Multidrug resistance protein D                                                                | 2.913 | 0.7284 |
| 32 | 1W5A | Cell division protein ftsZ homolog 1                                                          | 2.909 | 0.7273 |
| 33 | 1A0J | Trypsin-3                                                                                     | 2.908 | 0.727  |
| 34 | 1YED | Ig gamma-1 chain C region secreted form                                                       | 2.904 | 0.726  |
| 35 | 1E00 | Odorant-binding protein                                                                       | 2.901 | 0.7251 |
| 36 | 2I9X | Putative septation protein spoVG                                                              | 2.898 | 0.7245 |
| 37 | 2CWX | Ribulose biphosphate carboxylase                                                              | 2.897 | 0.7242 |
| 38 | 2QFD | Probable ATP-dependent RNA helicase DDX58                                                     | 2.896 | 0.724  |
| 39 | 2GNX | UPF0536 protein C12orf66 homolog                                                              | 2.896 | 0.724  |
| 40 | 2JWE | Tight junction protein ZO-1                                                                   | 2.895 | 0.7236 |
| 41 | 3DWL | Actin-related protein 3                                                                       | 2.894 | 0.7234 |
| 42 | 3D64 | Adenosylhomocysteinase                                                                        | 2.89  | 0.7225 |
| 43 | 2OPX | Lactaldehyde dehydrogenase                                                                    | 2.887 | 0.7218 |
| 44 | 2V3C | Signal recognition particle 19 kDa protein                                                    | 2.881 | 0.7203 |
| 45 | 2FM8 | Surface presentation of antigens protein spaK                                                 | 2.881 | 0.7202 |
| 46 | 1EYB | Homogentisate 1,2-dioxygenase                                                                 | 2.879 | 0.7199 |
| 47 | 2C9O | RuvB-like 1                                                                                   | 2.866 | 0.7165 |
| 48 | 3DRA | Protein farnesyltransferase/geranylgeranyltransferase type-1 subunit alpha                    | 2.864 | 0.716  |
| 49 | 1R1T | Transcriptional repressor smtB                                                                | 2.863 | 0.7157 |
| 50 | 1RF8 | Eukaryotic translation initiation factor 4E                                                   | 2.858 | 0.7145 |

**Table S9.** PharmMapper result for molecule **10g**.

|    | PDB ID | Target Name                                                    | Fit Score | Normalized Fit Score |
|----|--------|----------------------------------------------------------------|-----------|----------------------|
| 1  | 1VBI   | Dehydrogenase                                                  | 2.989     | 0.9964               |
| 2  | 2CT7   | RING finger protein 31                                         | 2.985     | 0.9948               |
| 3  | 3OK8   | NONE                                                           | 2.976     | 0.9921               |
| 4  | 2UXW   | Very long-chain specific acyl-CoA dehydrogenase, mitochondrial | 2.959     | 0.9864               |
| 5  | 1EVY   | Glycerol-3-phosphate dehydrogenase [NAD+], glycosomal          | 2.957     | 0.9858               |
| 6  | 1UKK   | Osmotically inducible protein C                                | 2.924     | 0.9747               |
| 7  | 2I15   | Uncharacterized protein MG296 homolog                          | 2.903     | 0.9676               |
| 8  | 2GWF   | Ubiquitin carboxyl-terminal hydrolase 8                        | 2.899     | 0.9662               |
| 9  | 2GZA   | Type IV secretion system protein virB11                        | 2.889     | 0.9629               |
| 10 | 1ROZ   | Deoxyhypusine synthase                                         | 2.885     | 0.9616               |
| 11 | 2CTK   | Vigilin                                                        | 2.88      | 0.9601               |
| 12 | 1YED   | Ig gamma-1 chain C region secreted form                        | 2.996     | 0.749                |
| 13 | 2CST   | Aspartate aminotransferase, cytoplasmic                        | 2.994     | 0.7485               |
| 14 | 2QTZ   | Methionine synthase reductase, mitochondrial                   | 2.985     | 0.7462               |
| 15 | 1SH4   | Cytochrome b5                                                  | 2.983     | 0.7458               |
| 16 | 1LJ0   | Cytochrome b5 type B                                           | 2.981     | 0.7454               |
| 17 | 2OWI   | Regulator of G-protein signaling 18                            | 2.972     | 0.743                |
| 18 | 2NRO   | Molybdopterin biosynthesis protein moeA                        | 2.965     | 0.7413               |
| 19 | 2VRE   | Delta(3,5)-Delta(2,4)-dienoyl-CoA isomerase, mitochondrial     | 2.957     | 0.7392               |
| 20 | 2JUB   | Internal protein I                                             | 2.953     | 0.7382               |
| 21 | 1Q2Y   | Uncharacterized N-acetyltransferase yjcF                       | 2.942     | 0.7354               |
| 22 | 2E02   | Cysteine proteinase 1, mitochondrial                           | 2.938     | 0.7344               |
| 23 | 1Y89   | DevB protein                                                   | 2.935     | 0.7337               |
| 24 | 1MK    | Transcriptional regulator, IclR family                         | 2.93      | 0.7326               |
| 25 | 2V0V   | Nuclear receptor subfamily 1 group D member 2                  | 2.93      | 0.7326               |
| 26 | 3EMJ   | Inorganic pyrophosphatase                                      | 2.93      | 0.7324               |
| 27 | 1LSH   | Vitellogenin                                                   | 2.929     | 0.7321               |
| 28 | 3HKI   | Prothrombin                                                    | 2.926     | 0.7315               |
| 29 | 1J3N   | Transferase                                                    | 2.925     | 0.7314               |
| 30 | 2CR7   | Paired amphipathic helix protein Sin3b                         | 2.916     | 0.7291               |
| 31 | 1ZRT   | Ubiquinol-cytochrome c reductase iron-sulfur subunit           | 2.916     | 0.729                |
| 32 | 2C9O   | RuvB-like 1                                                    | 2.915     | 0.7288               |
| 33 | 2FM8   | Surface presentation of antigens protein spaK                  | 2.914     | 0.7285               |
| 34 | 2OPX   | Lactaldehyde dehydrogenase                                     | 2.913     | 0.7282               |
| 35 | 1W5A   | Cell division protein ftsZ homolog 1                           | 2.912     | 0.7281               |
| 36 | 1KU5   | Archaeal histone A                                             | 2.91      | 0.7274               |
| 37 | 3DWL   | Actin-related protein 3                                        | 2.906     | 0.7265               |
| 38 | 2I9X   | Putative septation protein spoVG                               | 2.906     | 0.7264               |
| 39 | 3D64   | Adenosylhomocysteinase                                         | 2.904     | 0.7261               |

|    |      |                                                          |       |        |
|----|------|----------------------------------------------------------|-------|--------|
| 40 | 1IEB | H-2 class II histocompatibility antigen, E-D alpha chain | 2.904 | 0.726  |
| 41 | 1VB6 | Heme-regulated cyclic AMP phosphodiesterase              | 2.898 | 0.7245 |
| 42 | 1E00 | Odorant-binding protein                                  | 2.894 | 0.7236 |
| 43 | 2GFP | Multidrug resistance protein D                           | 2.892 | 0.7229 |
| 44 | 2QFD | Probable ATP-dependent RNA helicase DDX58                | 2.891 | 0.7228 |
| 45 | 3B8C | ATPase 2, plasma membrane-type                           | 2.89  | 0.7225 |
| 46 | 1XES | Dihydropinosylvin synthase                               | 3.61  | 0.722  |
| 47 | 2IX4 | 3-oxoacyl-[acyl-carrier-protein] synthase, mitochondrial | 2.888 | 0.722  |
| 48 | 1OSA | Calmodulin                                               | 2.878 | 0.7194 |
| 49 | 1WVC | Glucose-1-phosphate cytidyltransferase                   | 2.875 | 0.7188 |
| 50 | 2HGK | Uncharacterized protein yqcC                             | 2.873 | 0.7181 |

**Table S10.** PharmMapper result for molecule **11**.

|    | PDB ID | Target Name                                                                | Fit Score | Normalized Fit Score |
|----|--------|----------------------------------------------------------------------------|-----------|----------------------|
| 1  | 1VBI   | Dehydrogenase                                                              | 2.935     | 0.9784               |
| 2  | 5E2E   | NONE                                                                       | 2.666     | 0.8886               |
| 3  | 3BHY   | Death-associated protein kinase 3                                          | 2.999     | 0.7498               |
| 4  | 1D06   | Sensor protein fixL                                                        | 2.995     | 0.7488               |
| 5  | 3B8C   | ATPase 2, plasma membrane-type                                             | 2.995     | 0.7487               |
| 6  | 2CR7   | Paired amphipathic helix protein Sin3b                                     | 2.994     | 0.7484               |
| 7  | 2DQN   | Glutamyl-tRNA(Gln) amidotransferase subunit A                              | 2.994     | 0.7484               |
| 8  | 2CST   | Aspartate aminotransferase, cytoplasmic                                    | 2.979     | 0.7448               |
| 9  | 2I15   | Uncharacterized protein MG296 homolog                                      | 2.979     | 0.7447               |
| 10 | 1LJ0   | Cytochrome b5 type B                                                       | 2.973     | 0.7432               |
| 11 | 2OWI   | Regulator of G-protein signaling 18                                        | 2.966     | 0.7416               |
| 12 | 2NRO   | Molybdopterin biosynthesis protein moeA                                    | 2.947     | 0.7368               |
| 13 | 1J3N   | Transferase                                                                | 2.939     | 0.7348               |
| 14 | 3HKI   | Prothrombin                                                                | 2.939     | 0.7347               |
| 15 | 2VRE   | Delta(3,5)-Delta(2,4)-dienoyl-CoA isomerase, mitochondrial                 | 2.937     | 0.7343               |
| 16 | 2JWE   | Tight junction protein ZO-1                                                | 2.914     | 0.7284               |
| 17 | 2QFD   | Probable ATP-dependent RNA helicase DDX58                                  | 2.888     | 0.722                |
| 18 | 3DRA   | Protein farnesyltransferase/geranylgeranyltransferase type-1 subunit alpha | 2.883     | 0.7208               |
| 19 | 2GNX   | UPF0536 protein C12orf66 homolog                                           | 2.865     | 0.7162               |
| 20 | 1YED   | Ig gamma-1 chain C region secreted form                                    | 2.81      | 0.7026               |
| 21 | 2GQF   | Uncharacterized protein HI0933                                             | 2.807     | 0.7018               |
| 22 | 1B0N   | HTH-type transcriptional regulator sinR                                    | 2.803     | 0.7007               |
| 23 | 2IBJ   | Cytochrome b5                                                              | 2.795     | 0.6986               |
| 24 | 1GM    | Regulatory protein rop                                                     | 2.774     | 0.6935               |
| 25 | G      | Acetyl-CoA carboxylase                                                     | 2.76      | 0.69                 |
| 26 | 1UYR   | Transcription initiation factor TFIID subunit 9                            | 2.685     | 0.6713               |
| 27 | 1TAF   | Ubiquinol oxidase subunit 1                                                | 2.587     | 0.6466               |
| 28 | 1FFT   | Superoxide dismutase [Cu-Zn]                                               | 2.527     | 0.6319               |

|    |      |                                                     |       |        |
|----|------|-----------------------------------------------------|-------|--------|
| 29 | 2JZ6 | 50S ribosomal protein L28                           | 2.483 | 0.6208 |
| 30 | 1GK9 | Penicillin G acylase                                | 2.428 | 0.607  |
| 31 | 1ES8 | Type II restriction enzyme BglII                    | 2.407 | 0.6018 |
| 32 | 1VF5 | Cytochrome b6                                       | 2.999 | 0.5999 |
| 33 | 1SNL | Nucleobindin-1                                      | 2.999 | 0.5999 |
| 34 | 1GH7 | Cytokine receptor common subunit beta               | 2.999 | 0.5998 |
| 35 | 1UFI | Major centromere autoantigen B                      | 2.998 | 0.5995 |
| 36 | 2F8N | Histone H3.2                                        | 2.993 | 0.5985 |
| 37 | 2BTY | Acetylglutamate kinase                              | 2.992 | 0.5984 |
| 38 | 1RKS | Ribokinase                                          | 2.991 | 0.5983 |
| 39 | 1IVH | Isovaleryl-CoA dehydrogenase, mitochondrial         | 2.99  | 0.598  |
| 40 | 1GGZ | Calmodulin-like protein 3                           | 2.988 | 0.5977 |
| 41 | 1NA6 | Type-2 restriction enzyme EcoRII                    | 2.988 | 0.5976 |
| 42 | 2AY0 | Bifunctional protein putA                           | 2.988 | 0.5976 |
| 43 | 3G9K | Capsule biosynthesis protein capD                   | 2.988 | 0.5976 |
| 44 | 1GGT | Coagulation factor XIII A chain                     | 2.985 | 0.5969 |
| 45 | 1W8I | Uncharacterized protein AF_1683                     | 2.984 | 0.5968 |
| 46 | 1ZXX | Cadherin-8                                          | 2.98  | 0.5959 |
| 47 | 1VRN | Photosynthetic reaction center cytochrome c subunit | 2.979 | 0.5958 |
| 48 | 1E51 | Delta-aminolevulinic acid dehydratase               | 2.979 | 0.5957 |
| 49 | 2AYN | Ubiquitin carboxyl-terminal hydrolase 14            | 2.978 | 0.5956 |
|    | 2VW  |                                                     |       |        |
| 50 | T    | 2-keto-3-deoxy-L-rhamnonate aldolase                | 2.976 | 0.5953 |

**Table S11.** PharmMapper result for molecule **13a**.

|    | PDB ID | Target Name                                  | Fit Score | Normalized Fit Score |
|----|--------|----------------------------------------------|-----------|----------------------|
| 1  | 2FH0   | Uncharacterized protein YMR074C              | 2.949     | 0.983                |
| 2  | 4LUR   | NONE                                         | 2.946     | 0.9821               |
|    | 1M4    |                                              |           |                      |
| 3  | Y      | ATP-dependent protease hslV                  | 3.282     | 0.8204               |
| 4  | 1MJE   | 26S proteasome complex subunit DSS1          | 3.013     | 0.7531               |
| 5  | 2DU7   | O-phosphoserine-tRNA(Cys) synthetase         | 2.975     | 0.7438               |
| 6  | 2CST   | Aspartate aminotransferase, cytoplasmic      | 2.973     | 0.7431               |
| 7  | 1JVW   | Macrophage infectivity potentiator           | 2.97      | 0.7425               |
| 8  | 1RF8   | Eukaryotic translation initiation factor 4E  | 2.966     | 0.7416               |
| 9  | 2QG3   | UPF0130 protein AF_2059                      | 2.962     | 0.7405               |
| 10 | 3EMJ   | Inorganic pyrophosphatase                    | 2.956     | 0.7391               |
| 11 | 2JZ6   | 50S ribosomal protein L28                    | 2.951     | 0.7377               |
|    |        | Delta(3,5)-Delta(2,4)-dienoyl-CoA isomerase, |           |                      |
| 12 | 2VRE   | mitochondrial                                | 2.946     | 0.7366               |
|    | 2WA    |                                              |           |                      |
| 13 | 0      | Melanoma-associated antigen 4                | 2.935     | 0.7338               |
| 14 | 1C0L   | D-amino-acid oxidase                         | 2.93      | 0.7325               |
|    | 1BU    |                                              |           |                      |
| 15 | V      | Matrix metalloproteinase-14                  | 2.927     | 0.7319               |
| 16 | 2E02   | Cysteine proteinase 1, mitochondrial         | 2.924     | 0.731                |
| 17 | 1YED   | Ig gamma-1 chain C region secreted form      | 2.916     | 0.729                |



|    |      |                                                       |       |        |
|----|------|-------------------------------------------------------|-------|--------|
|    | 2NV  |                                                       |       |        |
| 18 | B    | NADP-dependent alcohol dehydrogenase                  | 2.908 | 0.727  |
|    | 2YX  |                                                       |       |        |
| 19 | R    | Preprotein translocase subunit secY                   | 2.907 | 0.7267 |
| 20 | 3FFV | Protein syd                                           | 2.903 | 0.7258 |
| 21 | 2EX5 | DNA endonuclease I-CeuI                               | 2.901 | 0.7254 |
| 22 | 2GFP | Multidrug resistance protein D                        | 2.898 | 0.7245 |
| 23 | 1FRV | Periplasmic [NiFe] hydrogenase small subunit          | 2.869 | 0.7173 |
| 24 | 2PO0 | Probable exosome complex exonuclease 1                | 2.866 | 0.7166 |
| 25 | 2VLD | UPF0286 protein PYRAB01260                            | 2.866 | 0.7164 |
|    | 3DR  | Protein farnesyltransferase/geranylgeranyltransferase |       |        |
| 26 | A    | type-1 subunit alpha                                  | 2.859 | 0.7147 |
|    | 1VB  |                                                       |       |        |
| 27 | G    | Pyruvate, phosphate dikinase 1, chloroplastic         | 2.852 | 0.7131 |
| 28 | 3D64 | Adenosylhomocysteinase                                | 2.85  | 0.7126 |
| 29 | 1QRJ | Gag-Pro-Pol polyprotein                               | 2.847 | 0.7118 |
| 30 | 3FQD | 5-3 exoribonuclease 2                                 | 3.313 | 0.6626 |
| 31 | 3D3L | Arachidonate 12-lipoxygenase, 12S-type                | 3.168 | 0.6335 |
| 32 | 1X65 | Cold shock domain-containing protein E1               | 3.78  | 0.6299 |
| 33 | 2WBI | Acyl-CoA dehydrogenase family member 11               | 3.055 | 0.6109 |
| 34 | 1IGR | Insulin-like growth factor 1 receptor                 | 3.011 | 0.6022 |
| 35 | 2GJX | Beta-hexosaminidase subunit alpha                     | 3     | 0.5999 |
| 36 | 2ES0 | Regulator of G-protein signaling 6                    | 2.992 | 0.5985 |
| 37 | 1XES | Dihydropinosylin synthase                             | 2.991 | 0.5982 |
| 38 | 2RM4 | Enhancer of mRNA-decapping protein 3                  | 2.99  | 0.5979 |
| 39 | 2H63 | Biliverdin reductase A                                | 2.986 | 0.5971 |
| 40 | 1L0V | Fumarate reductase flavoprotein subunit               | 2.983 | 0.5967 |
| 41 | 2E55 | Uracil phosphoribosyltransferase                      | 3.579 | 0.5965 |
| 42 | 1VF5 | Cytochrome b6                                         | 2.982 | 0.5964 |
| 43 | 2R46 | Aerobic glycerol-3-phosphate dehydrogenase            | 2.98  | 0.596  |
|    | 1UW  |                                                       |       |        |
| 44 | 4    | Regulator of nonsense transcripts 3B                  | 2.974 | 0.5947 |
| 45 | 1IVX | Phenylethylamine oxidase                              | 2.96  | 0.5921 |
| 46 | 1OVT | Ovotransferrin                                        | 2.951 | 0.5902 |
| 47 | 1PUJ | Ribosome biogenesis GTPase A                          | 3.537 | 0.5895 |
| 48 | 2AY0 | Bifunctional protein putA                             | 2.946 | 0.5893 |
| 49 | 2HJS | USG-1 protein homolog                                 | 2.941 | 0.5883 |
| 50 | 1JEY | ATP-dependent DNA helicase 2 subunit 1                | 2.938 | 0.5876 |

**Table S12.** PharmMapper result for molecule **15a**.

|   | PDB ID | Target Name                 | Fit Score | Normalized Fit Score |
|---|--------|-----------------------------|-----------|----------------------|
|   | 1M4    |                             |           |                      |
| 1 | Y      | ATP-dependent protease hslV | 3.264     | 0.8159               |
| 2 | 1RZO   | Agglutinin                  | 3.158     | 0.7896               |
|   | 2XB    |                             |           |                      |
| 3 | U      | NONE                        | 3.084     | 0.771                |
| 4 | 3FFV   | Protein syd                 | 2.989     | 0.7473               |

|    |      |                                                                            |       |        |
|----|------|----------------------------------------------------------------------------|-------|--------|
| 5  | 2JZ6 | 50S ribosomal protein L28                                                  | 2.973 | 0.7432 |
| 6  | 2AQT | Superoxide dismutase [Cu-Zn]                                               | 2.955 | 0.7386 |
| 7  | 2VRE | Delta(3,5)-Delta(2,4)-dienoyl-CoA isomerase, mitochondrial                 | 2.907 | 0.7268 |
| 8  | 2CST | Aspartate aminotransferase, cytoplasmic                                    | 2.888 | 0.722  |
| 9  | 2QEQ | Genome polyprotein                                                         | 2.865 | 0.7163 |
| 10 | 2B6E | Putative esterase HI1161                                                   | 2.861 | 0.7153 |
| 11 | 3DR  | Protein farnesyltransferase/geranylgeranyltransferase type-1 subunit alpha | 2.861 | 0.7152 |
|    | A    |                                                                            |       |        |
|    | 1UY  |                                                                            |       |        |
| 12 | R    | Acetyl-CoA carboxylase                                                     | 2.852 | 0.713  |
| 13 | 2VLD | UPF0286 protein PYRAB01260                                                 | 2.837 | 0.7092 |
| 14 | 1R6U | Tryptophanyl-tRNA synthetase, cytoplasmic                                  | 2.827 | 0.7068 |
| 15 | 1PP9 | Cytochrome b-c1 complex subunit 1, mitochondrial                           | 2.821 | 0.7052 |
| 16 | 2RFA | Transient receptor potential cation channel subfamily V member 6           | 2.82  | 0.705  |
| 17 | 2E0G | Chromosomal replication initiator protein dnaA                             | 2.81  | 0.7024 |
|    | 1KC  |                                                                            |       |        |
| 18 | G    | NKG2D ligand 3                                                             | 2.773 | 0.6933 |
| 19 | 1QZ9 | Kynureninase                                                               | 2.773 | 0.6931 |
| 20 | 1FRV | Periplasmic [NiFe] hydrogenase small subunit                               | 2.77  | 0.6924 |
|    | 3DX  | Mitochondrial import inner membrane translocase subunit                    |       |        |
| 21 | R    | TIM9                                                                       | 2.763 | 0.6908 |
|    | 2DB  |                                                                            |       |        |
| 22 | A    | Protein unc-45 homolog A                                                   | 2.756 | 0.689  |
| 23 | 2PUJ | 2-hydroxy-6-oxo-6-phenylhexa-2,4-dienoate hydrolase                        | 2.753 | 0.6882 |
| 24 | 2W9S | Dihydrofolate reductase type 1 from Tn4003                                 | 2.742 | 0.6855 |
| 25 | 1LSH | Vitellogenin                                                               | 2.73  | 0.6825 |
| 26 | 1QRJ | Gag-Pro-Pol polyprotein                                                    | 2.722 | 0.6804 |
|    | 1W9  |                                                                            |       |        |
| 27 | C    | Exportin-1                                                                 | 2.716 | 0.679  |
| 28 | 1F3T | Ornithine decarboxylase                                                    | 2.711 | 0.6776 |
| 29 | 1SYO | Cation-independent mannose-6-phosphate receptor                            | 2.691 | 0.6728 |
| 30 | 2D7R | Polypeptide N-acetylgalactosaminyltransferase 10                           | 2.679 | 0.6697 |
|    | 2DQ  |                                                                            |       |        |
| 31 | N    | Glutamyl-tRNA(Gln) amidotransferase subunit A                              | 3.34  | 0.668  |
|    | 2DY  | Amyloid beta A4 precursor protein-binding family B                         |       |        |
| 32 | Q    | member 3                                                                   | 2.67  | 0.6675 |
| 33 | 1EE8 | Formamidopyrimidine-DNA glycosylase                                        | 2.648 | 0.6621 |
| 34 | 1FPP | Protein farnesyltransferase subunit beta                                   | 3.298 | 0.6596 |
| 35 | 1P9B | Adenylosuccinate synthetase                                                | 2.636 | 0.6589 |
| 36 | 1Q3O | SH3 and multiple ankyrin repeat domains protein 1                          | 2.634 | 0.6586 |
| 37 | 1J4A | D-lactate dehydrogenase                                                    | 3.224 | 0.6448 |
| 38 | 3E7W | D-alanine--poly(phosphoribitol) ligase subunit 1                           | 3.798 | 0.633  |
| 39 | 1IGR | Insulin-like growth factor 1 receptor                                      | 3.133 | 0.6267 |
| 40 | 2E55 | Uracil phosphoribosyltransferase                                           | 3.565 | 0.5942 |
| 41 | 2H63 | Biliverdin reductase A                                                     | 2.963 | 0.5926 |
| 42 | 1YPF | GMP reductase                                                              | 2.95  | 0.5901 |
| 43 | 2D3L | Glucan 1,4-alpha-maltohexaosidase                                          | 2.941 | 0.5883 |
| 44 | 1T9K | Methylthioribose-1-phosphate isomerase                                     | 2.922 | 0.5845 |

|    |      |                                                     |       |        |
|----|------|-----------------------------------------------------|-------|--------|
| 45 | 2HJS | USG-1 protein homolog                               | 2.911 | 0.5822 |
| 46 | 2G18 | Phycocyanobili                                      | 2.904 | 0.5809 |
| 47 | 1Y1U | Signal transducer and activator of transcription 5A | 2.895 | 0.579  |
| 48 | 1TM0 | Uncharacterized protein BMEI1586                    | 2.893 | 0.5786 |
| 49 | 1C8S | Bacteriorhodopsin                                   | 2.89  | 0.578  |
| 50 | 2P1Q | SKP1-like protein 1A                                | 2.874 | 0.5748 |

**Table S13.** PharmMapper result for molecule **15f**.

|    | PDB ID      | Target Name                                                                                      | Fit Score | Normalized Fit Score |
|----|-------------|--------------------------------------------------------------------------------------------------|-----------|----------------------|
| 1  | 1LFG        | Lactotransferrin                                                                                 | 2.97      | 0.9899               |
| 2  | 2FH0        | Uncharacterized protein YMR074C                                                                  | 2.926     | 0.9754               |
| 3  | 2VVJ<br>1M4 | NONE                                                                                             | 3.308     | 0.8269               |
| 4  | Y           | ATP-dependent protease hslV                                                                      | 3.285     | 0.8213               |
| 5  | 1RZO        | Agglutinin                                                                                       | 3.207     | 0.8016               |
| 6  | 1MJE        | 26S proteasome complex subunit DSS1                                                              | 3.032     | 0.7579               |
| 7  | 2VEQ<br>3DR | B<br>Protein farnesyltransferase/geranylgeranyltransferase                                       | 2.991     | 0.7478               |
| 8  | A           | type-1 subunit alpha                                                                             | 2.975     | 0.7437               |
| 9  | 3FFV        | Protein syd                                                                                      | 2.974     | 0.7434               |
| 10 | 2AQT        | Superoxide dismutase [Cu-Zn]                                                                     | 2.954     | 0.7384               |
| 11 | 2VRE<br>2NV | Delta(3,5)-Delta(2,4)-dienoyl-CoA isomerase,<br>mitochondrial                                    | 2.954     | 0.7384               |
| 12 | B           | NADP-dependent alcohol dehydrogenase                                                             | 2.952     | 0.7379               |
| 13 | 2GQF<br>3DX | Uncharacterized protein HI0933<br>Mitochondrial import inner membrane translocase subunit        | 2.943     | 0.7358               |
| 14 | R           | TIM9                                                                                             | 2.942     | 0.7356               |
| 15 | 2QEQ        | Genome polyprotein                                                                               | 2.939     | 0.7348               |
| 16 | 2JZ6        | 50S ribosomal protein L28                                                                        | 2.938     | 0.7346               |
| 17 | 1LJ0        | Cytochrome b5 type B                                                                             | 2.917     | 0.7293               |
| 18 | 2CST        | Aspartate aminotransferase, cytoplasmic                                                          | 2.912     | 0.728                |
| 19 | 2PUJ<br>2GN | 2-hydroxy-6-oxo-6-phenylhexa-2,4-dienoate hydrolase                                              | 2.904     | 0.726                |
| 20 | X           | UPF0536 protein C12orf66 homolog                                                                 | 2.9       | 0.7249               |
| 21 | 2I15        | Uncharacterized protein MG296 homolog                                                            | 2.886     | 0.7214               |
| 22 | 3FQD<br>2DQ | 5-3 exoribonuclease 2                                                                            | 3.341     | 0.6682               |
| 23 | N           | Glutamyl-tRNA(Gln) amidotransferase subunit A                                                    | 3.11      | 0.622                |
| 24 | 1J4A        | D-lactate dehydrogenase                                                                          | 3.109     | 0.6219               |
| 25 | 1FPP<br>1D5 | Protein farnesyltransferase subunit beta<br>HLA class II histocompatibility antigen, DRB1-4 beta | 3.103     | 0.6206               |
| 26 | M           | chain                                                                                            | 3.049     | 0.6099               |
| 27 | 1IGR        | Insulin-like growth factor 1 receptor                                                            | 3.002     | 0.6003               |
| 28 | 1L0V        | Fumarate reductase flavoprotein subunit                                                          | 2.998     | 0.5995               |
| 29 | 1OVT        | Ovotransferrin                                                                                   | 2.997     | 0.5995               |

|    |             |                                                           |       |        |
|----|-------------|-----------------------------------------------------------|-------|--------|
| 30 | 1XES        | Dihydropinosylvin synthase                                | 2.992 | 0.5983 |
| 31 | 2E55        | Uracil phosphoribosyltransferase                          | 3.589 | 0.5981 |
| 32 | 1B0A        | Bifunctional protein fold                                 | 2.986 | 0.5972 |
| 33 | 3DF0        | Calpain-2 catalytic subunit                               | 2.986 | 0.5971 |
| 34 | 1W8I<br>2RN | Uncharacterized protein AF_1683                           | 2.98  | 0.596  |
| 35 | X           | Histone acetyltransferase KAT2B                           | 2.974 | 0.5948 |
| 36 | 3EXA        | tRNA Delta(2)-isopentenylpyrophosphate transferase        | 2.974 | 0.5948 |
| 37 | 1IVX        | Phenylethylamine oxidase                                  | 2.968 | 0.5935 |
| 38 | 1EXV        | Glycogen phosphorylase, liver form                        | 2.965 | 0.593  |
| 39 | 2AY0<br>1YV | Bifunctional protein putA                                 | 2.964 | 0.5928 |
| 40 | G           | Tetanus toxin                                             | 2.961 | 0.5922 |
| 41 | 2H63        | Biliverdin reductase A                                    | 2.952 | 0.5904 |
| 42 | 2P1Q        | SKP1-like protein 1A                                      | 2.951 | 0.5901 |
| 43 | 2F8N        | Histone H3.2                                              | 2.948 | 0.5897 |
| 44 | 1J3I        | Bifunctional dihydrofolate reductase-thymidylate synthase | 2.948 | 0.5896 |
| 45 | 3D47        | L-rhamnonate dehydratase                                  | 3.529 | 0.5882 |
| 46 | 1C8S        | Bacteriorhodopsin                                         | 2.927 | 0.5854 |
| 47 | 2D3L        | Glucan 1,4-alpha-maltohexaosidase                         | 2.926 | 0.5853 |
| 48 | 2H60        | Probable global transcription activator SNF2L4            | 2.919 | 0.5839 |
| 49 | 1ZXK        | Cadherin-8                                                | 2.917 | 0.5833 |
| 50 | 2GP6        | 3-oxoacyl-[acyl-carrier-protein] synthase 2               | 2.914 | 0.5827 |

**Table S14.** PharmMapper result for molecule **17a**.

|    | PDB ID | Target Name                                                                  | Fit Score | Normalized Fit Score |
|----|--------|------------------------------------------------------------------------------|-----------|----------------------|
|    |        | Membrane-associated guanylate kinase, WW and PDZ domain-containing protein 2 |           |                      |
| 1  | 1UJV   |                                                                              | 2.996     | 0.7489               |
| 2  | 3RFW   | NONE                                                                         | 2.987     | 0.7467               |
| 3  | 1P35   | Early 35 kDa protein                                                         | 2.97      | 0.7426               |
| 4  | 1U2E   | 2-hydroxy-6-oxononadienedioate/2-hydroxy-6-oxononatrienedioate hydrolase     | 2.963     | 0.7409               |
| 5  | 1RZU   | Glycogen synthase 1                                                          | 2.959     | 0.7398               |
| 6  | 3B3D   | Uncharacterized oxidoreductase ytbE                                          | 2.959     | 0.7397               |
| 7  | 1JL2   | Ribonuclease HI                                                              | 2.956     | 0.7391               |
| 8  | 1YAV   | Uncharacterized protein ykuL                                                 | 2.938     | 0.7345               |
| 9  | 2AQT   | Superoxide dismutase [Cu-Zn]                                                 | 2.921     | 0.7301               |
| 10 | 2CWX   | Ribulose biphosphate carboxylase                                             | 2.92      | 0.7301               |
|    |        | Centromere DNA-binding protein complex CBF3 subunit                          |           |                      |
| 11 | 2VEQ   | B                                                                            | 2.918     | 0.7295               |
| 12 | 2CUE   | Paired box protein Pax-6                                                     | 2.907     | 0.7268               |
| 13 | 2NVB   | NADP-dependent alcohol dehydrogenase                                         | 2.907     | 0.7267               |
| 14 | 2CST   | Aspartate aminotransferase, cytoplasmic                                      | 2.896     | 0.724                |
| 15 | 1U94   | Protein recA                                                                 | 2.869     | 0.7172               |
| 16 | 1RZO   | Agglutinin                                                                   | 2.864     | 0.716                |
| 17 | 3FQD   | 5-3 exoribonuclease 2                                                        | 3.407     | 0.6814               |

|    |             |                                                            |       |        |
|----|-------------|------------------------------------------------------------|-------|--------|
| 18 | 1QOX        | Beta-glucosidase                                           | 3.274 | 0.6548 |
| 19 | 1XJV        | Protection of telomeres protein 1                          | 3.242 | 0.6484 |
| 20 | 1WIN        | Flotillin-2                                                | 3.237 | 0.6474 |
| 21 | 1BUC        | Acyl-CoA dehydrogenase, short-chain specific               | 3.196 | 0.6392 |
| 22 | 1OGY        | Periplasmic nitrate reductase                              | 3.136 | 0.6273 |
| 23 | 3DLJ        | Beta-Ala-His dipeptidase                                   | 3.127 | 0.6253 |
| 24 | 2QVV        | Fructose-1,6-bisphosphatase 1                              | 4.31  | 0.6158 |
| 25 | 1S40        | Cell division control protein 13                           | 3.682 | 0.6136 |
| 26 | 2VIG        | Short-chain specific acyl-CoA dehydrogenase, mitochondrial | 3.067 | 0.6134 |
| 27 | 1J3I        | Bifunctional dihydrofolate reductase-thymidylate synthase  | 3     | 0.6    |
| 28 | 1U08        | Aminotransferase ybdL                                      | 3     | 0.6    |
| 29 | 2RNX        | Histone acetyltransferase KAT2B                            | 3     | 0.6    |
| 30 | 1EXV<br>2YW | Glycogen phosphorylase, liver form                         | 2.995 | 0.599  |
| 31 | W           | Aspartate carbamoyltransferase regulatory chain            | 2.988 | 0.5975 |
| 32 | 1Q4R        | Probable protein Pop3                                      | 2.977 | 0.5955 |
| 33 | 2G18        | Phycocyanobili                                             | 2.972 | 0.5944 |
| 34 | 2Z6E        | Disheveled-associated activator of morphogenesis 1         | 2.964 | 0.5927 |
| 35 | 2GP6        | 3-oxoacyl-[acyl-carrier-protein] synthase 2                | 2.954 | 0.5908 |
| 36 | 1R0U        | Uncharacterized beta-barrel protein ywiB                   | 2.95  | 0.5899 |
| 37 | 1Y1U        | Signal transducer and activator of transcription 5A        | 2.944 | 0.5888 |
| 38 | 3EXA        | tRNA Delta(2)-isopentenylpyrophosphate transferase         | 2.943 | 0.5886 |
| 39 | 2AY0        | Bifunctional protein putA                                  | 2.94  | 0.5881 |
| 40 | 1C9B        | Transcription initiation factor IIB                        | 2.936 | 0.5872 |
| 41 | 1I3R        | H-2 class II histocompatibility antigen, E-K alpha chain   | 2.929 | 0.5857 |
| 42 | 2R0N        | Glutaryl-CoA dehydrogenase, mitochondrial                  | 2.925 | 0.585  |
| 43 | 2F8N        | Histone H3.2                                               | 2.917 | 0.5834 |
| 44 | 2BTV        | Core protein VP3                                           | 2.899 | 0.5798 |
| 45 | 2FY4        | Choline O-acetyltransferase                                | 2.891 | 0.5781 |
| 46 | 2BTY        | Acetylglutamate kinase                                     | 2.889 | 0.5778 |
| 47 | 1VRN        | Photosynthetic reaction center cytochrome c subunit        | 2.888 | 0.5777 |
| 48 | 1B0A        | Bifunctional protein fold                                  | 2.887 | 0.5774 |
| 49 | 3GVI        | Malate dehydrogenase                                       | 2.883 | 0.5767 |
| 50 | 2EJE        | General transcription factor II-I                          | 3.455 | 0.5758 |

**Table S15.** PharmMapper result for molecule **20**.

|   | PDB ID | Target Name                                     | Fit Score | Normalized Fit Score |
|---|--------|-------------------------------------------------|-----------|----------------------|
| 1 | 2FH0   | Uncharacterized protein YMR074C                 | 2.99      | 0.9968               |
| 2 | 3DG3   | NONE                                            | 2.99      | 0.9968               |
| 3 | 1M4Y   | ATP-dependent protease hslV                     | 3.271     | 0.8178               |
| 4 | 1RZO   | Agglutinin                                      | 3.096     | 0.774                |
| 5 | 2FM8   | Surface presentation of antigens protein spaK   | 2.996     | 0.749                |
| 6 | 1R1T   | Transcriptional repressor smtB                  | 2.993     | 0.7483               |
| 7 | 1TAF   | Transcription initiation factor TFIID subunit 9 | 2.987     | 0.7469               |
| 8 | 2JZ6   | 50S ribosomal protein L28                       | 2.985     | 0.7463               |

|    |             |                                                                                             |       |        |
|----|-------------|---------------------------------------------------------------------------------------------|-------|--------|
| 9  | 2CST        | Aspartate aminotransferase, cytoplasmic                                                     | 2.983 | 0.7457 |
| 10 | 2IBJ        | Cytochrome b5                                                                               | 2.981 | 0.7453 |
| 11 | 1JFI<br>1WV | Dr1-associated corepressor                                                                  | 2.98  | 0.7451 |
| 12 | C           | Glucose-1-phosphate cytidyltransferase                                                      | 2.979 | 0.7447 |
| 13 | 1QRJ        | Gag-Pro-Pol polyprotein                                                                     | 2.977 | 0.7443 |
| 14 | 1F81        | CREB-binding protein                                                                        | 2.977 | 0.7442 |
| 15 | 3CA8        | Protein ydcF                                                                                | 2.976 | 0.7441 |
| 16 | 1YED        | Ig gamma-1 chain C region secreted form                                                     | 2.976 | 0.7441 |
| 17 | 1JVW        | Macrophage infectivity potentiator<br>Protein farnesyltransferase/geranylgeranyltransferase | 2.973 | 0.7433 |
| 18 | 3DRA        | type-1 subunit alpha                                                                        | 2.973 | 0.7432 |
| 19 | 1W1G        | 3-phosphoinositide-dependent protein kinase 1                                               | 2.969 | 0.7422 |
| 20 | 3FFV        | Protein syd                                                                                 | 2.969 | 0.7422 |
| 21 | 1BG5        | Glutathione S-transferase class-mu 26 kDa isozyme                                           | 2.969 | 0.7422 |
| 22 | 2QFD        | Probable ATP-dependent RNA helicase DDX58                                                   | 2.969 | 0.7421 |
| 23 | 1LK3        | Interleukin-10                                                                              | 2.968 | 0.742  |
| 24 | 2OWI        | Regulator of G-protein signaling 18                                                         | 2.965 | 0.7413 |
| 25 | 1FRV        | Periplasmic [NiFe] hydrogenase small subunit                                                | 2.965 | 0.7412 |
| 26 | 2NRO        | Molybdopterin biosynthesis protein moeA                                                     | 2.964 | 0.7409 |
| 27 | 2RGV        | Peroxide operon regulator                                                                   | 2.964 | 0.7409 |
| 28 | 1IOD        | Agkisacutacin subunit A                                                                     | 2.962 | 0.7406 |
| 29 | 2OPX<br>1GM | Lactaldehyde dehydrogenase                                                                  | 2.955 | 0.7387 |
| 30 | G           | Regulatory protein rop                                                                      | 2.953 | 0.7384 |
| 31 | 1ZZG        | Glucose-6-phosphate isomerase                                                               | 2.953 | 0.7384 |
| 32 | 3EMJ        | Inorganic pyrophosphatase<br>Delta(3,5)-Delta(2,4)-dienoyl-CoA isomerase,                   | 2.953 | 0.7381 |
| 33 | 2VRE        | mitochondrial                                                                               | 2.952 | 0.7379 |
| 34 | 3FQD        | 5-3 exoribonuclease 2                                                                       | 3.512 | 0.7024 |
| 35 | 3HBF        | Flavonoid 3-O-glucosyltransferase                                                           | 3.307 | 0.6614 |
| 36 | 1I4H        | Enterotoxin type A                                                                          | 3.293 | 0.6587 |
| 37 | 2Z6E        | Disheveled-associated activator of morphogenesis 1                                          | 3.234 | 0.6468 |
| 38 | 1Q4R        | Probable protein Pop3<br>Formate-dependent nitrite reductase complex subunit                | 3.229 | 0.6459 |
| 39 | 2E2E        | nrfG<br>HLA class II histocompatibility antigen, DRB1-4 beta                                | 3.225 | 0.645  |
| 40 | 1D5M        | chain                                                                                       | 3.195 | 0.6389 |
| 41 | 2DQN        | Glutamyl-tRNA(Gln) amidotransferase subunit A                                               | 3.192 | 0.6385 |
| 42 | 1TXO        | PP2C-family Ser/Thr phosphatase                                                             | 3.164 | 0.6327 |
| 43 | 2IWQ        | Multiple PDZ domain protein                                                                 | 3.157 | 0.6314 |
| 44 | 1WJI        | Tudor domain-containing protein 3                                                           | 3.767 | 0.6279 |
| 45 | 1R44        | D-alanyl-D-alanine dipeptidase                                                              | 3.117 | 0.6234 |
| 46 | 1LYL        | Lysyl-tRNA synthetase, heat inducible                                                       | 3.112 | 0.6225 |
| 47 | 1IGR        | Insulin-like growth factor 1 receptor                                                       | 3.111 | 0.6221 |
| 48 | 1J4A        | D-lactate dehydrogenase                                                                     | 3.089 | 0.6177 |
| 49 | 1X65        | Cold shock domain-containing protein E1                                                     | 3.694 | 0.6156 |
| 50 | 3E7W        | D-alanine--poly(phosphoribitol) ligase subunit 1                                            | 3.658 | 0.6096 |

**Table S16.** PharmMapper result for molecule **21a**.

|    | PDB ID | Target Name                                                              | Fit Score | Normalized Fit Score |
|----|--------|--------------------------------------------------------------------------|-----------|----------------------|
| 1  | 1U02   | NONE                                                                     | 2.981     | 0.9938               |
| 2  | 2UX    | Very long-chain specific acyl-CoA dehydrogenase, mitochondrial           | 2.981     | 0.9937               |
| 3  | W      |                                                                          |           |                      |
| 4  | 2CT7   | RING finger protein 31                                                   | 2.969     | 0.9897               |
| 5  | 1ROZ   | Deoxyhypusine synthase                                                   | 2.959     | 0.9863               |
| 6  | 1NI2   | Ezrin                                                                    | 2.95      | 0.9833               |
| 7  | 2I15   | Uncharacterized protein MG296 homolog                                    | 2.942     | 0.9807               |
| 8  | 2GZA   | Type IV secretion system protein virB11                                  | 2.941     | 0.9803               |
| 9  | 2CTK   | Vigilin                                                                  | 2.935     | 0.9782               |
| 10 | 1EVY   | Glycerol-3-phosphate dehydrogenase [NAD+], glycosomal                    | 2.934     | 0.9779               |
| 11 | 1LJ0   | Cytochrome b5 type B                                                     | 2.998     | 0.7494               |
| 12 | 2C9O   | RuvB-like 1                                                              | 2.994     | 0.7486               |
| 13 | 1P35   | Early 35 kDa protein                                                     | 2.988     | 0.747                |
| 14 | 1TYB   | Tyrosyl-tRNA synthetase                                                  | 2.984     | 0.7461               |
| 15 | 1VB6   | Heme-regulated cyclic AMP phosphodiesterase                              | 2.98      | 0.745                |
| 16 | 2BK3   | Amine oxidase [flavin-containing] B                                      | 3.719     | 0.7438               |
| 17 | 2NVB   | NADP-dependent alcohol dehydrogenase                                     | 2.974     | 0.7436               |
| 18 | 2INR   | DNA topoisomerase 4 subunit A                                            | 2.973     | 0.7432               |
| 19 | 2JHQ   | Uracil-DNA glycosylase                                                   | 2.972     | 0.743                |
| 20 | 3DW    |                                                                          |           |                      |
| 21 | L      | Actin-related protein 3                                                  | 2.968     | 0.742                |
| 22 | 2CR7   | Paired amphipathic helix protein Sin3b                                   | 2.967     | 0.7417               |
| 23 | 2QEQ   | Genome polyprotein                                                       | 2.965     | 0.7412               |
| 24 | 1XKE   | E3 SUMO-protein ligase RanBP2                                            | 2.964     | 0.741                |
| 25 | 1YED   | Ig gamma-1 chain C region secreted form                                  | 2.963     | 0.7408               |
| 26 | 1R1T   | Transcriptional repressor smtB                                           | 2.96      | 0.7399               |
| 27 | 2IBJ   | Cytochrome b5                                                            | 2.957     | 0.7392               |
| 28 | 2E02   | Cysteine proteinase 1, mitochondrial                                     | 2.957     | 0.7392               |
| 29 | 2VEQ   | Centromere DNA-binding protein complex CBF3 subunit B                    | 2.957     | 0.7392               |
| 30 | 1U2E   | 2-hydroxy-6-oxononadienedioate/2-hydroxy-6-oxononatrienedioate hydrolase | 2.957     | 0.7391               |
| 31 | 1IEB   | H-2 class II histocompatibility antigen, E-D alpha chain                 | 2.954     | 0.7386               |
| 32 | 1ZR4   | Transposon gamma-delta resolvase                                         | 2.954     | 0.7385               |
| 33 | 1OSA   | Calmodulin                                                               | 2.954     | 0.7384               |
| 34 | 2HGK   | Uncharacterized protein yqcC                                             | 2.953     | 0.7383               |
| 35 | 1FFT   | Ubiquinol oxidase subunit 1                                              | 2.95      | 0.7375               |
| 36 | 2IX4   | 3-oxoacyl-[acyl-carrier-protein] synthase, mitochondrial                 | 2.95      | 0.7375               |
| 37 | 3CRC   | Protein mazG                                                             | 2.947     | 0.7368               |
| 38 | 1IG3   | Thiamin pyrophosphokinase 1                                              | 2.944     | 0.7361               |
| 39 | 1ZRT   | Ubiquinol-cytochrome c reductase iron-sulfur subunit                     | 2.944     | 0.736                |
| 40 | 2EW0   | UPF0301 protein ACIAD0353                                                | 2.942     | 0.7355               |
| 41 | 1KU5   | Archaeal histone A                                                       | 2.941     | 0.7354               |
| 42 | 2GQF   | Uncharacterized protein HI0933                                           | 2.941     | 0.7352               |
| 43 | 2CV8   | tRNA-splicing endonuclease                                               | 2.94      | 0.735                |

|    |             |                                                                                 |       |        |
|----|-------------|---------------------------------------------------------------------------------|-------|--------|
| 42 | 3EMJ<br>2CW | Inorganic pyrophosphatase                                                       | 2.94  | 0.735  |
| 43 | X           | Ribulose biphosphate carboxylase                                                | 2.94  | 0.7349 |
| 44 | 3D64        | Adenosylhomocysteinase                                                          | 2.938 | 0.7344 |
| 45 | 1UD9        | DNA polymerase sliding clamp A                                                  | 2.936 | 0.734  |
| 46 | 2GFP        | Multidrug resistance protein D                                                  | 2.936 | 0.734  |
| 47 | 3CT4        | PTS-dependent dihydroxyacetone kinase,<br>dihydroxyacetone-binding subunit dhaK | 2.935 | 0.7338 |
| 48 | 1JFI        | Dr1-associated corepressor                                                      | 2.934 | 0.7335 |
| 49 | 1ES8        | Type II restriction enzyme BglIII                                               | 2.934 | 0.7334 |
| 50 | 1UYR        | Acetyl-CoA carboxylase                                                          | 2.93  | 0.7326 |

**Table S17.** PharmMapper result for molecule **21d**.

|    | PDB<br>ID | Target Name                                                                     | Fit<br>Score | Normalized<br>Fit Score |
|----|-----------|---------------------------------------------------------------------------------|--------------|-------------------------|
| 1  | 1IVH      | Isovaleryl-CoA dehydrogenase, mitochondrial                                     | 3.807        | 0.7615                  |
| 2  | 2I15      | Uncharacterized protein MG296 homolog                                           | 2.999        | 0.7498                  |
| 3  | 3RFW      | NONE                                                                            | 2.996        | 0.749                   |
| 4  | 1D06      | Sensor protein fixL<br>Centromere DNA-binding protein complex CBF3<br>subunit B | 2.996        | 0.749                   |
| 5  | 2VEQ      | subunit B                                                                       | 2.994        | 0.7486                  |
| 6  | 2AQT      | Superoxide dismutase [Cu-Zn]                                                    | 2.993        | 0.7483                  |
| 7  | 2GQF      | Uncharacterized protein HI0933                                                  | 2.993        | 0.7482                  |
| 8  | 2CR7      | Paired amphipathic helix protein Sin3b                                          | 2.992        | 0.7481                  |
| 9  | 3B8C      | ATPase 2, plasma membrane-type                                                  | 2.989        | 0.7474                  |
| 10 | 1LJ0      | Cytochrome b5 type B                                                            | 2.987        | 0.7468                  |
| 11 | 2NVB      | NADP-dependent alcohol dehydrogenase                                            | 2.986        | 0.7465                  |
| 12 | 1QZ9      | Kynureninase                                                                    | 2.984        | 0.746                   |
| 13 | 1P35      | Early 35 kDa protein                                                            | 2.98         | 0.7451                  |
| 14 | 1P9O      | Phosphopantothenate--cysteine ligase                                            | 2.979        | 0.7448                  |
| 15 | 3BHY      | Death-associated protein kinase 3                                               | 2.975        | 0.7439                  |
| 16 | 2QEQ      | Genome polyprotein                                                              | 2.97         | 0.7426                  |
| 17 | 2CWX      | Ribulose biphosphate carboxylase                                                | 2.967        | 0.7418                  |
| 18 | 2DQN      | Glutamyl-tRNA(Gln) amidotransferase subunit A                                   | 2.966        | 0.7414                  |
| 19 | 2CST      | Aspartate aminotransferase, cytoplasmic                                         | 2.963        | 0.7408                  |
| 20 | 3HKI      | Prothrombin                                                                     | 2.962        | 0.7405                  |
| 21 | 3FMO      | Nuclear pore complex protein Nup214                                             | 2.959        | 0.7397                  |
| 22 | 1JL2      | Ribonuclease HI                                                                 | 2.957        | 0.7391                  |
| 23 | 1YQT      | RNase I inhibitor                                                               | 2.954        | 0.7385                  |
| 24 | 3CPR      | Dihydrodipicolinate synthase                                                    | 2.954        | 0.7384                  |
| 25 | 2NRO      | Molybdopterin biosynthesis protein moeA                                         | 2.945        | 0.7363                  |
| 26 | 2FJU      | Ras-related C3 botulinum toxin substrate 1                                      | 2.932        | 0.733                   |
| 27 | 1W63      | AP-1 complex subunit gamma-1                                                    | 2.932        | 0.7329                  |
| 28 | 2OQE      | Peroxisomal primary amine oxidase                                               | 2.927        | 0.7318                  |
| 29 | 2PKP      | Homoaconitase small subunit                                                     | 2.926        | 0.7314                  |
| 30 | 2OWI      | Regulator of G-protein signaling 18                                             | 2.925        | 0.7312                  |
| 31 | 1JQK      | Carbon monoxide dehydrogenase                                                   | 2.924        | 0.7311                  |



|    |      |                                                            |       |        |
|----|------|------------------------------------------------------------|-------|--------|
| 32 | 3FFV | Protein syd                                                | 2.92  | 0.7299 |
| 33 | 1KCG | NKG2D ligand 3                                             | 2.919 | 0.7297 |
| 34 | 2VRE | Delta(3,5)-Delta(2,4)-dienoyl-CoA isomerase, mitochondrial | 2.918 | 0.7295 |
| 35 | 1V2Y | U11/U12 small nuclear ribonucleoprotein 25 kDa protein     | 2.917 | 0.7292 |
| 36 | 1UYR | Acetyl-CoA carboxylase                                     | 2.916 | 0.7289 |
| 37 | 3CRC | Protein mazG                                               | 2.908 | 0.7269 |
| 38 | 2KA5 | Putative anti-sigma factor antagonist TM_1081              | 3.829 | 0.6382 |
| 39 | 3BID | UPF0339 protein NMA1193/NMA1859                            | 3.683 | 0.6139 |
| 40 | 2RNX | Histone acetyltransferase KAT2B                            | 3.06  | 0.6121 |
| 41 | 1E51 | Delta-aminolevulinic acid dehydratase                      | 3     | 0.6    |
| 42 | 1SNL | Nucleobindin-1                                             | 2.999 | 0.5997 |
| 43 | 1J3I | Bifunctional dihydrofolate reductase-thymidylate synthase  | 2.998 | 0.5996 |
| 44 | 1GH7 | Cytokine receptor common subunit beta                      | 2.997 | 0.5995 |
| 45 | 1EXV | Glycogen phosphorylase, liver form                         | 2.996 | 0.5993 |
| 46 | 2YWW | Aspartate carbamoyltransferase regulatory chain            | 2.985 | 0.597  |
| 47 | 1DK8 | Axin-1                                                     | 2.985 | 0.5969 |
| 48 | 3DF0 | Calpain-2 catalytic subunit                                | 2.984 | 0.5968 |
| 49 | 1XES | Dihydropinosylvin synthase                                 | 2.984 | 0.5968 |
| 50 | 1LOV | Fumarate reductase flavoprotein subunit                    | 2.981 | 0.5962 |

**Table S18.** Pharmacophore screening results.

| N molecules <sup>a</sup> | PDB ID | Target Name                                           |
|--------------------------|--------|-------------------------------------------------------|
| 6                        | 2CST   | Aspartate aminotransferase, cytoplasmic               |
| 5                        | 2I15   | Uncharacterized protein MG296 homolog                 |
| 4                        | 1D06   | Sensor protein fixL                                   |
| 4                        | 1M4Y   | ATP-dependent protease hslV                           |
| 4                        | 1VBI   | Dehydrogenase                                         |
| 4                        | 2AQT   | Superoxide dismutase [Cu-Zn]                          |
| 3                        | 1LJ0   | Cytochrome b5 type B                                  |
| 3                        | 1RZO   | Agglutinin                                            |
| 3                        | 2FH0   | Uncharacterized protein YMR074C                       |
| 3                        | 2GWF   | Ubiquitin carboxyl-terminal hydrolase 8               |
| 3                        | 2GZA   | Type IV secretion system protein virB11               |
| 3                        | 3B8C   | ATPase 2, plasma membrane-type                        |
| 2                        | 1DK8   | Axin-1                                                |
| 2                        | 1EVY   | Glycerol-3-phosphate dehydrogenase [NAD+], glycosomal |
| 2                        | 1LFG   | Lactotransferrin                                      |
| 2                        | 1MJE   | 26S proteasome complex subunit DSS1                   |
| 2                        | 1R1T   | Transcriptional repressor smtB                        |
| 2                        | 1RF8   | Eukaryotic translation initiation factor 4E           |
| 2                        | 1ROZ   | Deoxyhypusine synthase                                |

|   |      |                                                                              |
|---|------|------------------------------------------------------------------------------|
|   |      | 2-hydroxy-6-oxononadienedioate/2-hydroxy-6-oxononatrienedioate hydrolase     |
| 2 | 1U2E | Membrane-associated guanylate kinase, WW and PDZ domain-containing protein 2 |
| 2 | 1UJV | Osmotically inducible protein C                                              |
| 2 | 1UKK | Dihydropinosylvin synthase                                                   |
| 2 | 1XES | Paired amphipathic helix protein Sin3b                                       |
| 2 | 2CR7 | RING finger protein 31                                                       |
| 2 | 2CT7 | Glutamyl-tRNA(Gln) amidotransferase subunit A                                |
| 2 | 2DQN | Uncharacterized protein HI0933                                               |
| 2 | 2GQF | 50S ribosomal protein L28                                                    |
| 2 | 2JZ6 | Regulator of G-protein signaling 18                                          |
| 2 | 2OWI | Very long-chain specific acyl-CoA dehydrogenase, mitochondrial               |
| 2 | 2UXW | Centromere DNA-binding protein complex CBF3 subunit B                        |
| 2 | 2VEQ | Delta(3,5)-Delta(2,4)-dienoyl-CoA isomerase, mitochondrial                   |
| 2 | 2VRE | Uncharacterized oxidoreductase ytbE                                          |
| 2 | 3B3D | Death-associated protein kinase 3                                            |
| 2 | 3BHY | Protein farnesyltransferase/geranylgeranyltransferase type-1 subunit alpha   |
| 2 | 3DRA | Protein syd                                                                  |
| 2 | 3FFV |                                                                              |

<sup>a</sup> number of molecules that have the indicated target among the best 10 proteins targets identified by the pharmacophore mapping analysis.

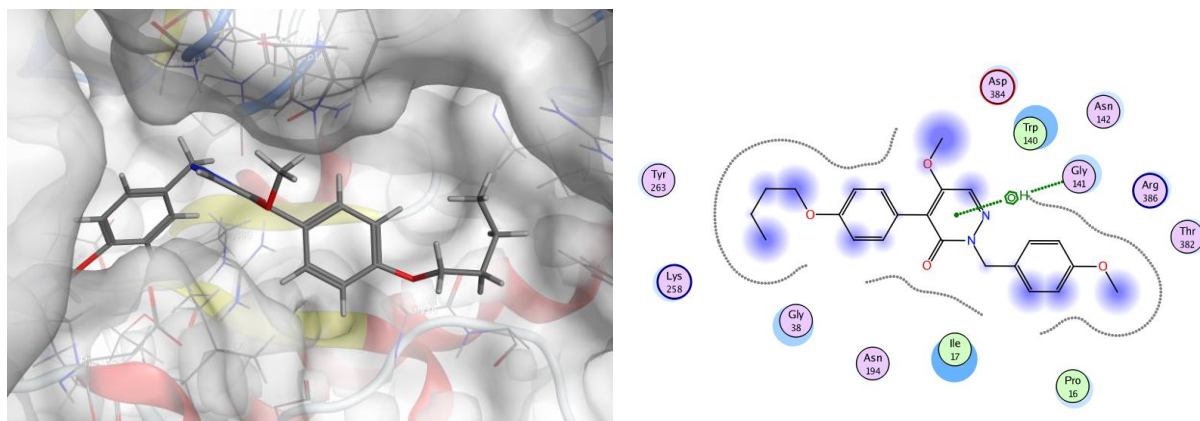

**Figure S1.** Docking pose of compound **1a**.

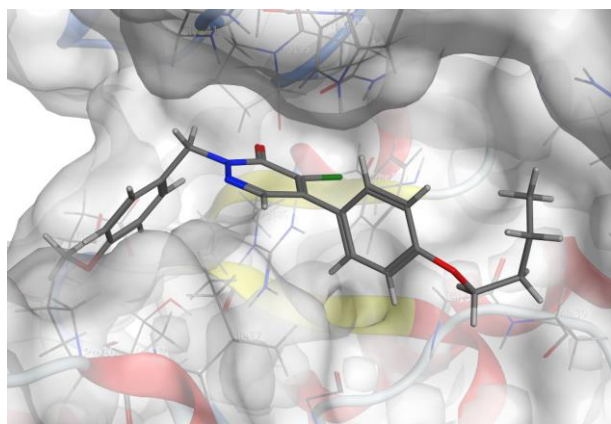

**Figure S2.** Docking pose of compound **2a**.

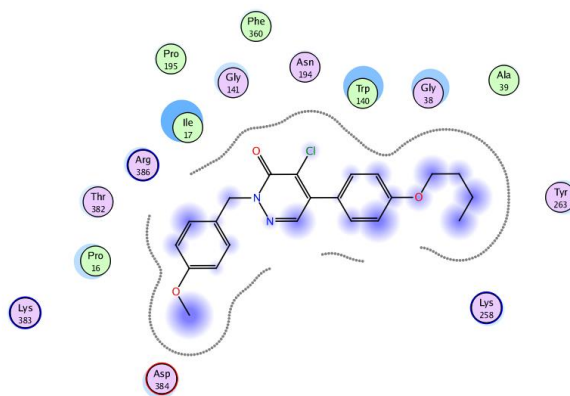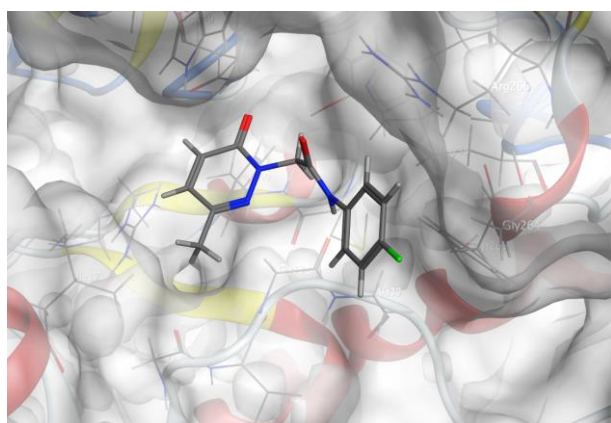

**Figure S3.** Docking pose of compound **3a**.

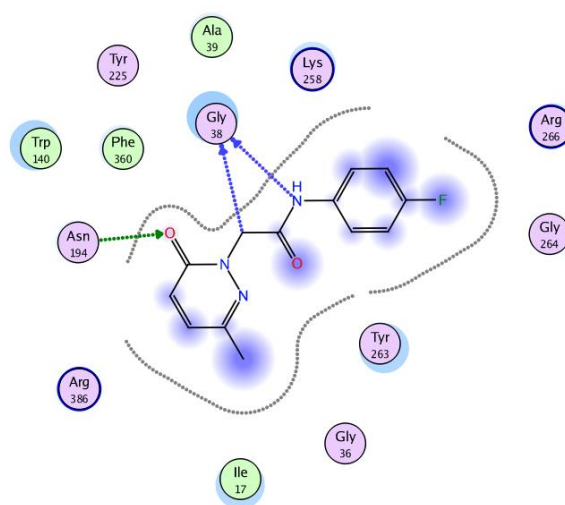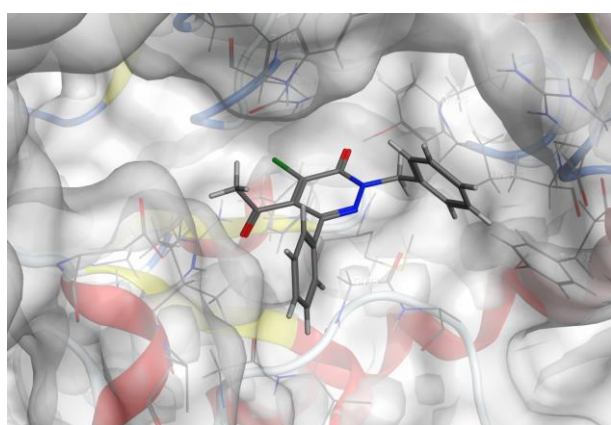

**Figure S4.** Docking pose of compound **5a**.

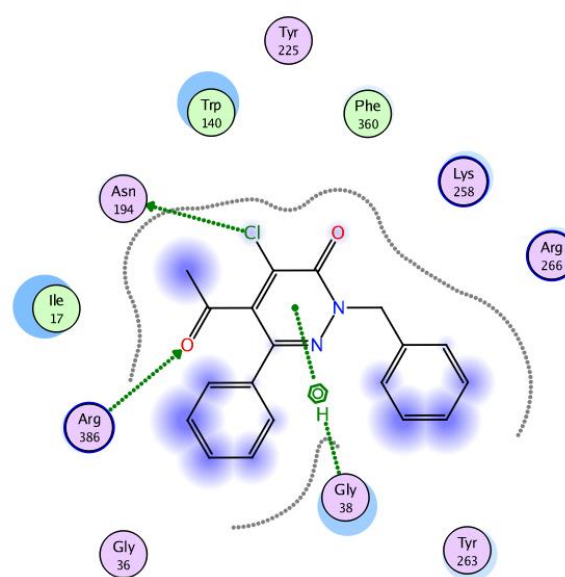

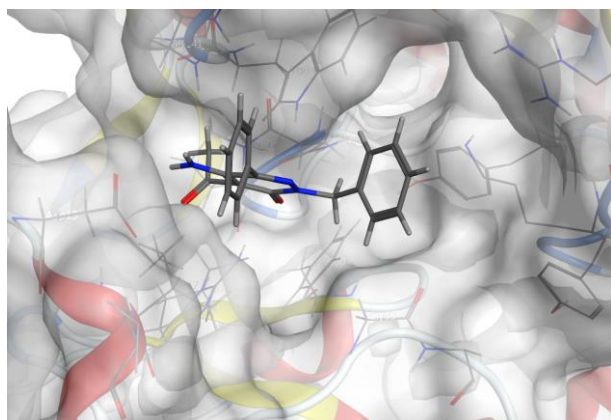

**Figure S5.** Docking pose of compound **7**.

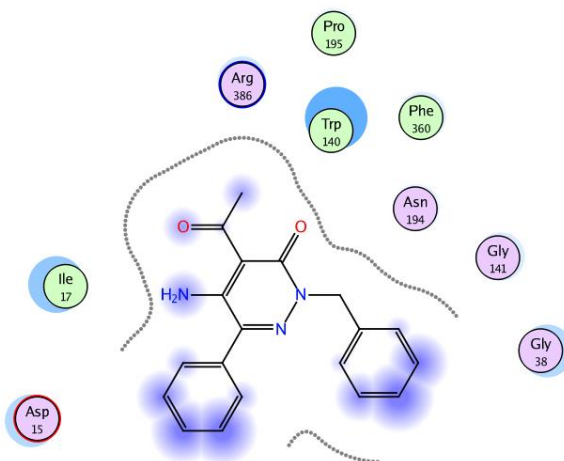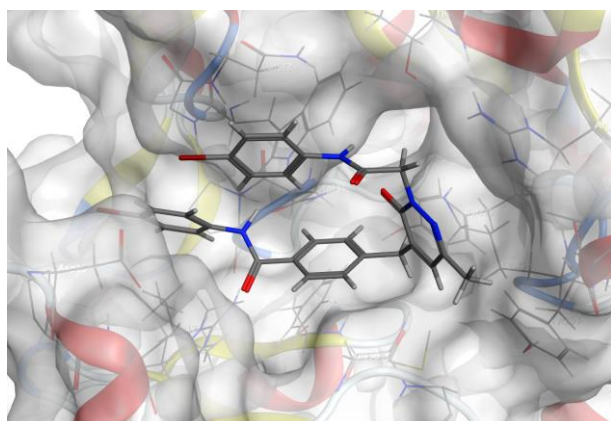

**Figure S6.** Docking pose of compound **8**.

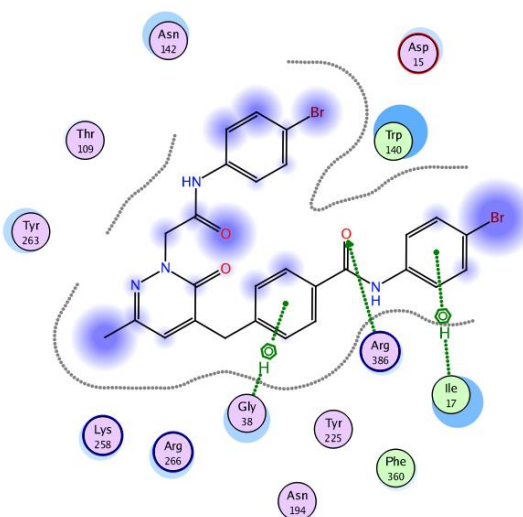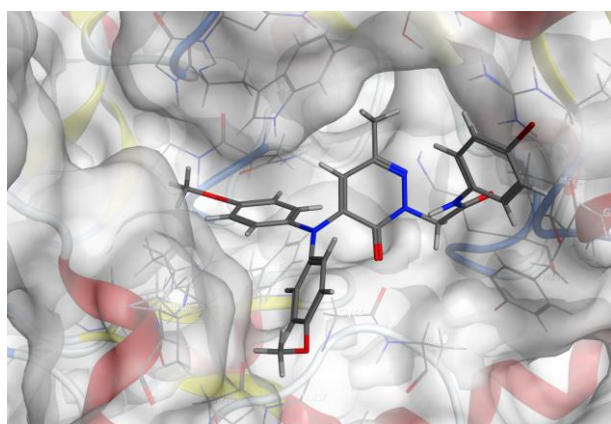

**Figure S7.** Docking pose of compound **9**.

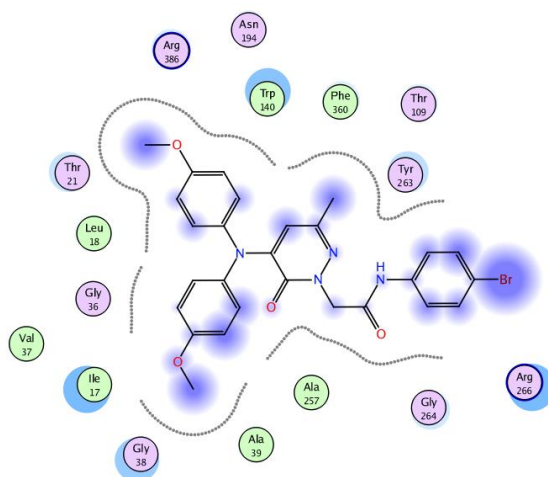



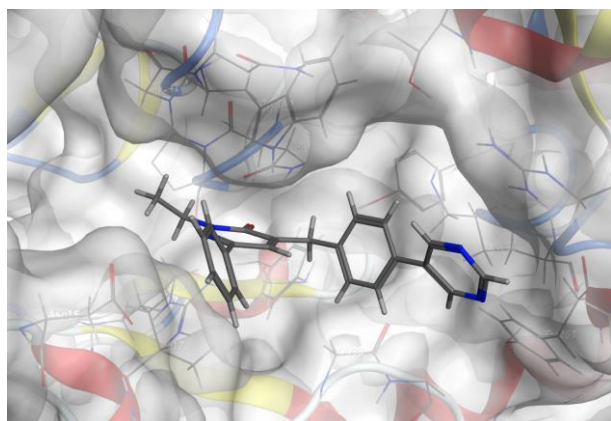

**Figure S8.** Docking pose of compound **10b**.

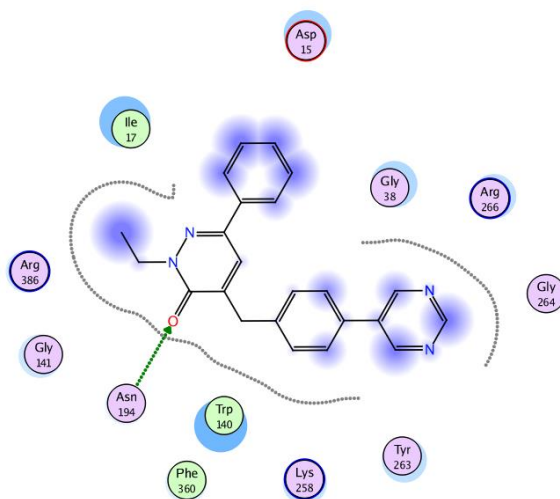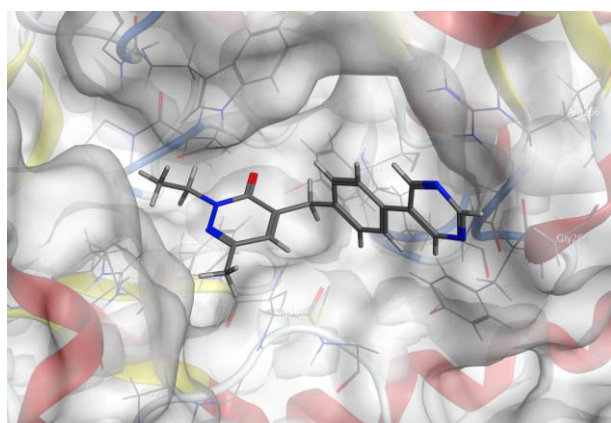

**Figure S9.** Docking pose of compound **10g**.

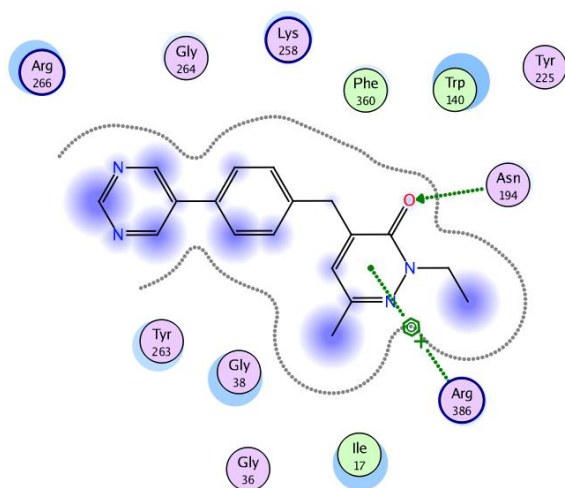

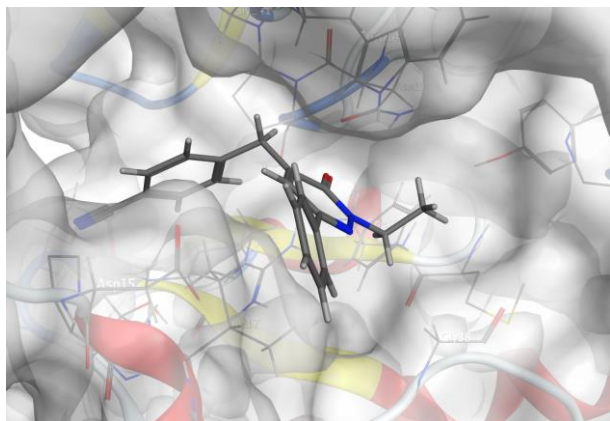

**Figure S10.** Docking pose of compound **11**.

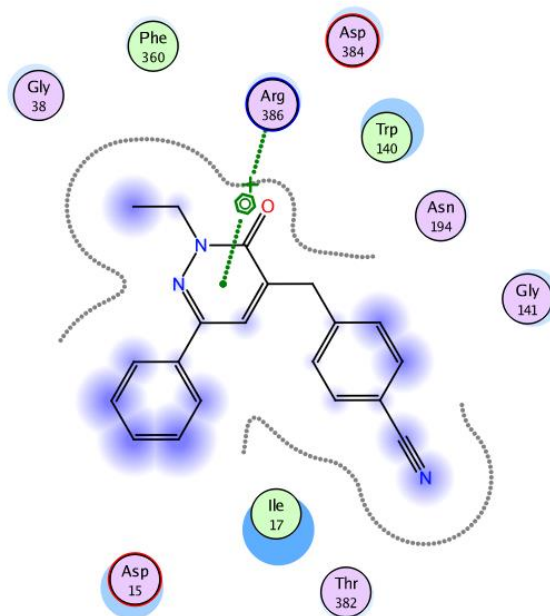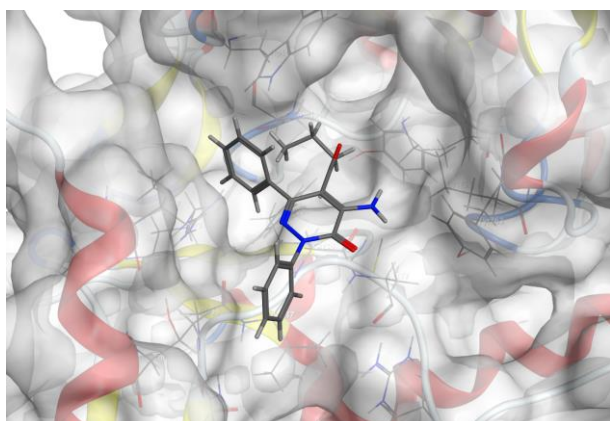

**Figure S11.** Docking pose of compound **13a**.

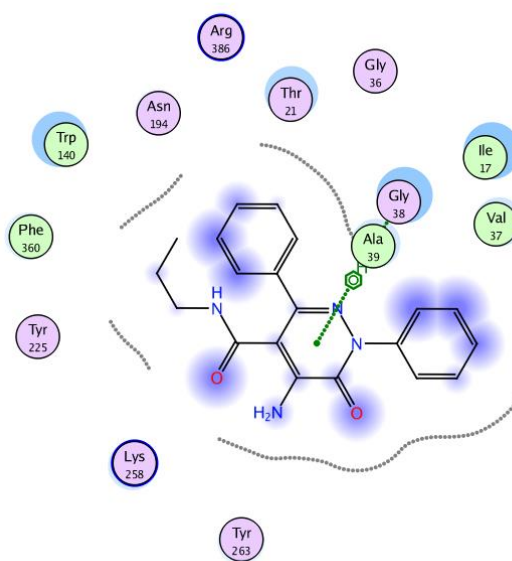

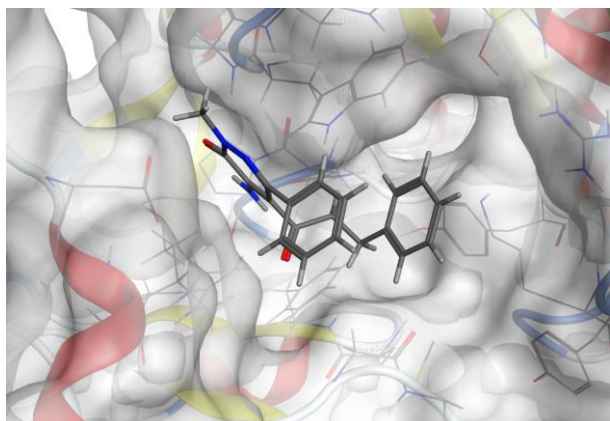

**Figure S12.** Docking pose of compound **15a**.

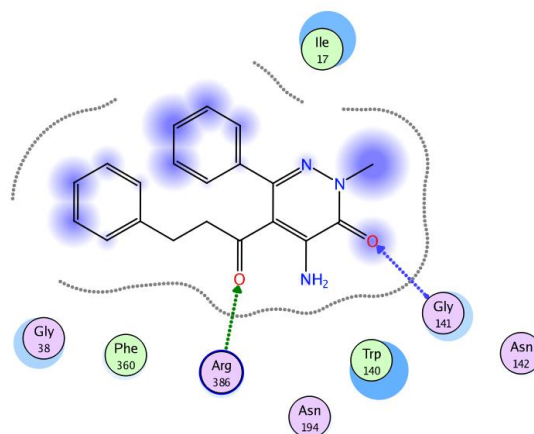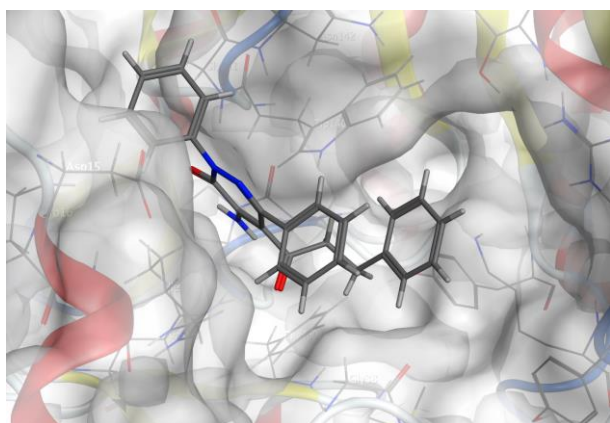

**Figure S13.** Docking pose of compound **15f**.

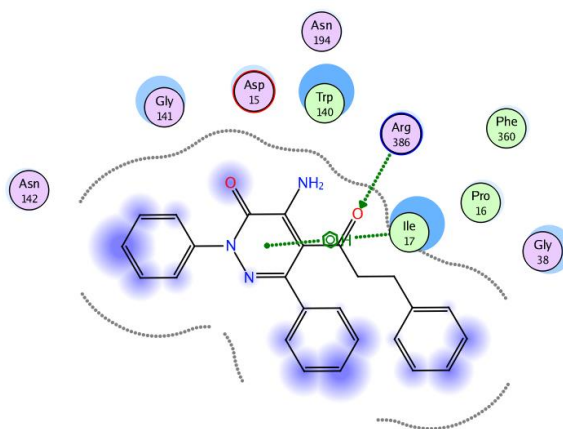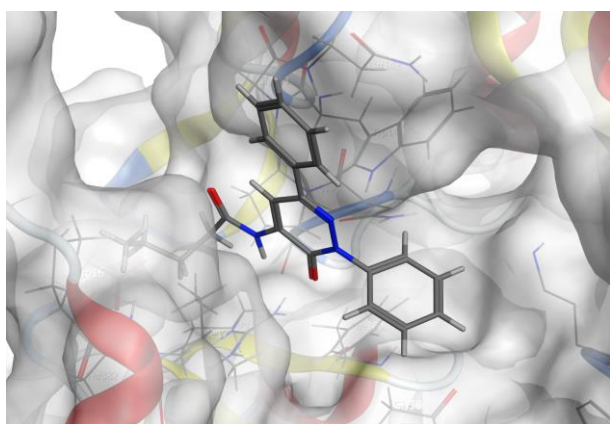

**Figure S14.** Docking pose of compound **17a**.

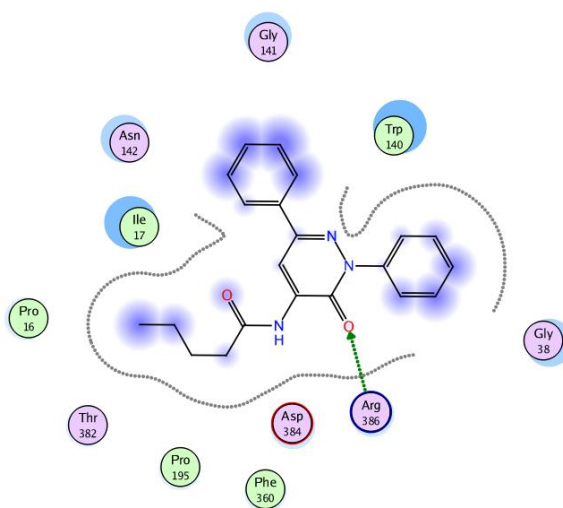



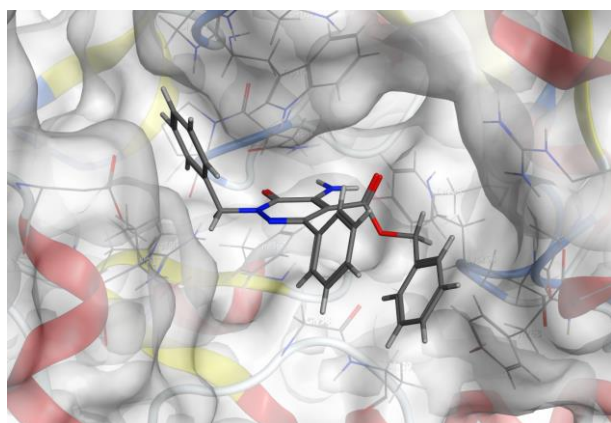

**Figure S15.** Docking pose of compound **20**.

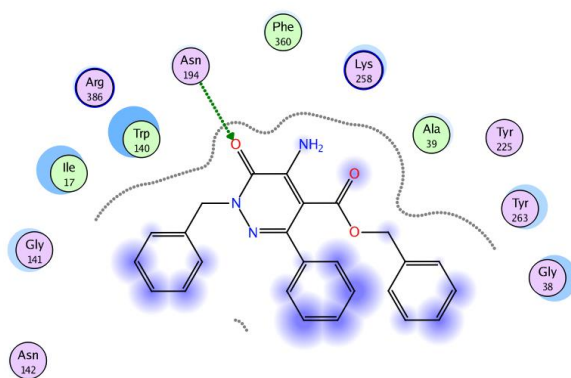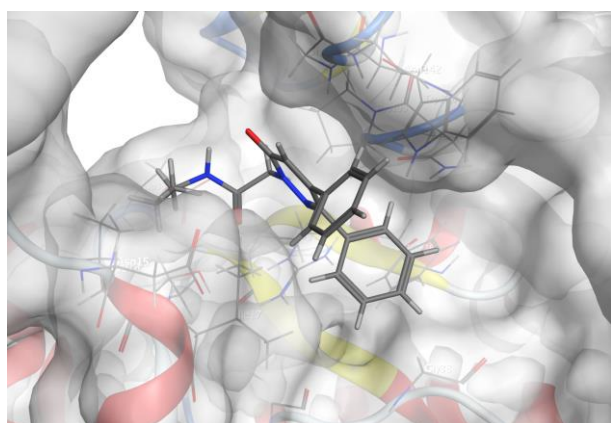

**Figure S16.** Docking pose of compound **21a**.

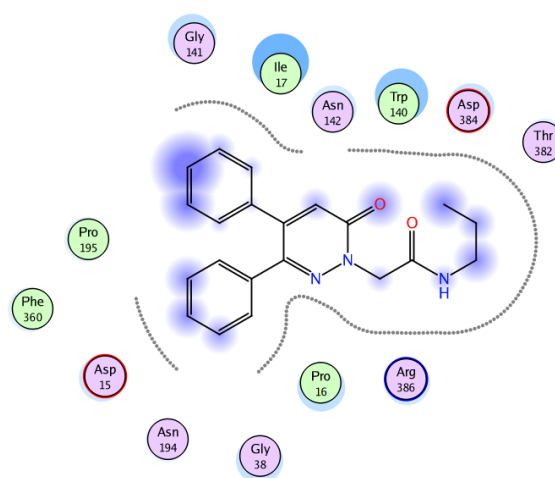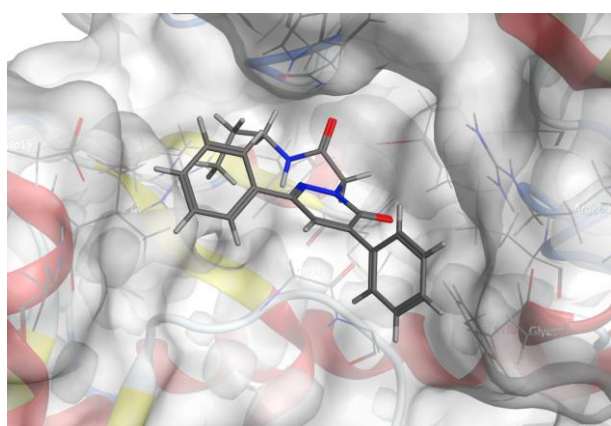

**Figure S17.** Docking pose of compound **21d**.

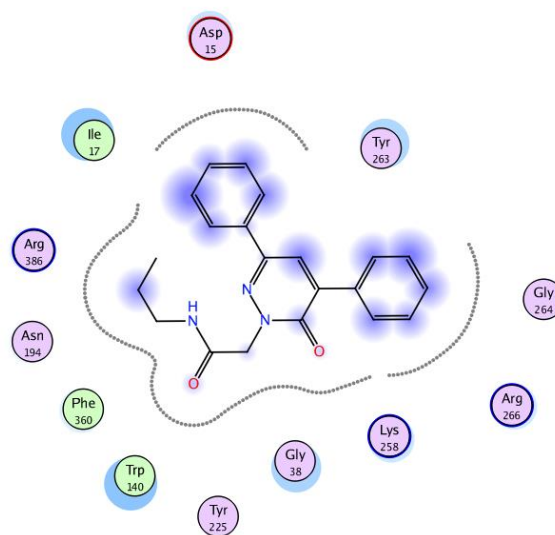



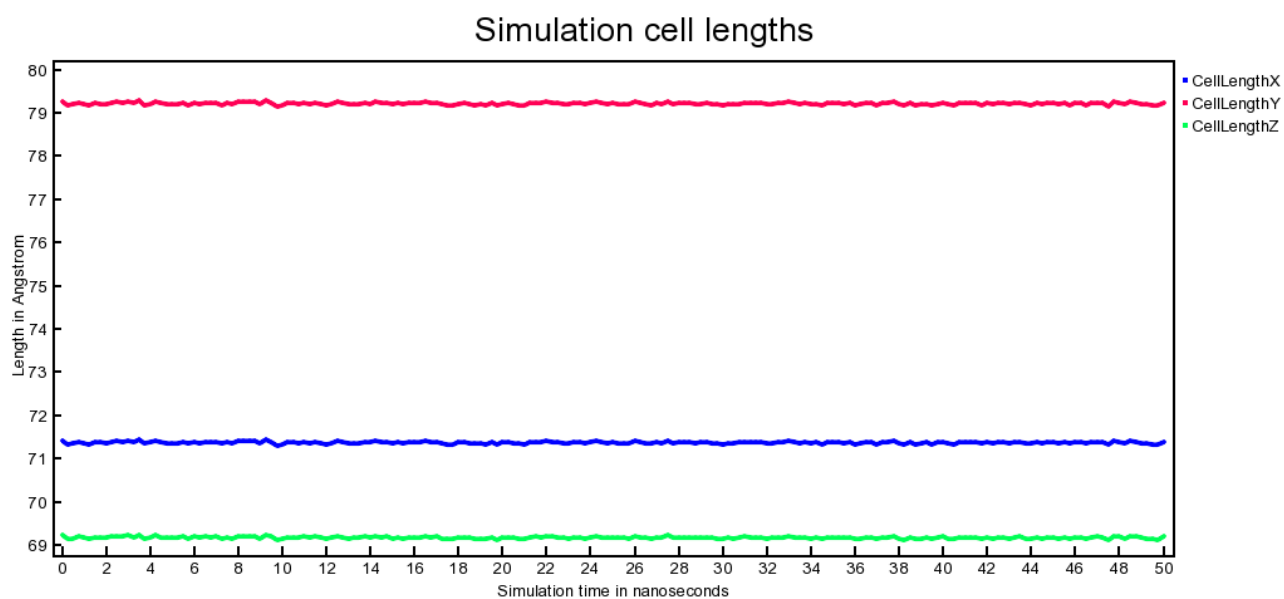

**Figure S18.** Simulation cell lengths [vertical axis] as a function of simulation time [horizontal axis]

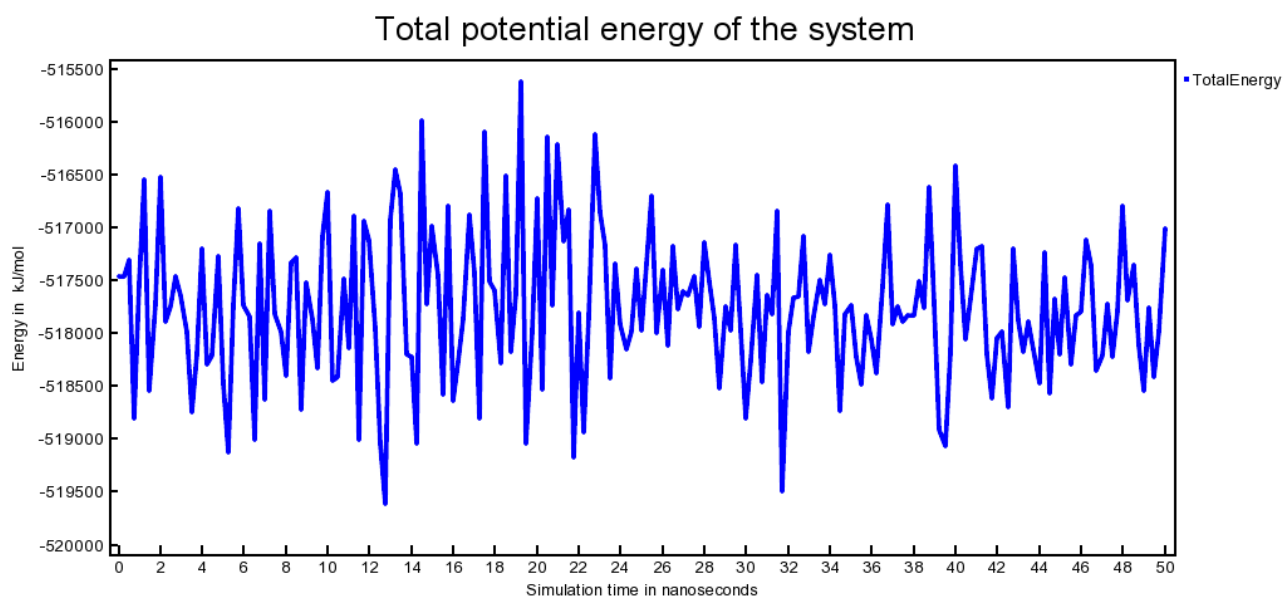

**Figure S19.** Total potential energy of the system [vertical axis] as a function of simulation time [horizontal axis]. Note: The first value of the plot [-639667.06], coming from the energy minimized starting structure, has been replaced with the second value of the plot [-517460.65] to show this plot with a smaller energy range and thus a higher resolution.

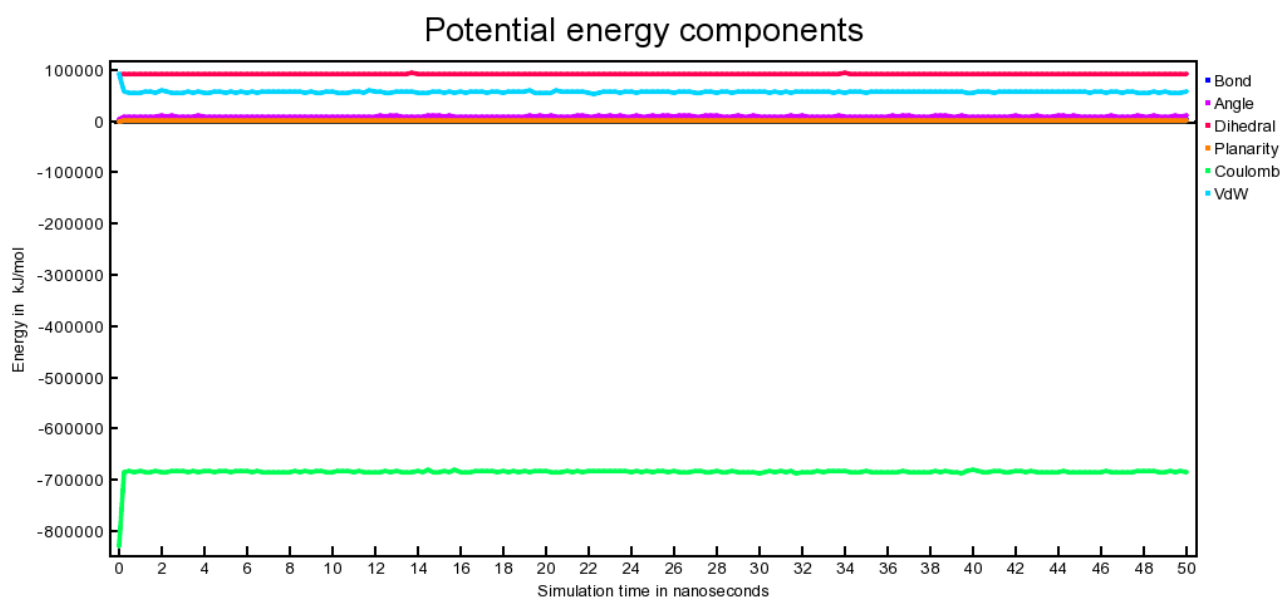

**Figure S20.** Potential energy components [vertical axis] as a function of simulation time [horizontal axis].

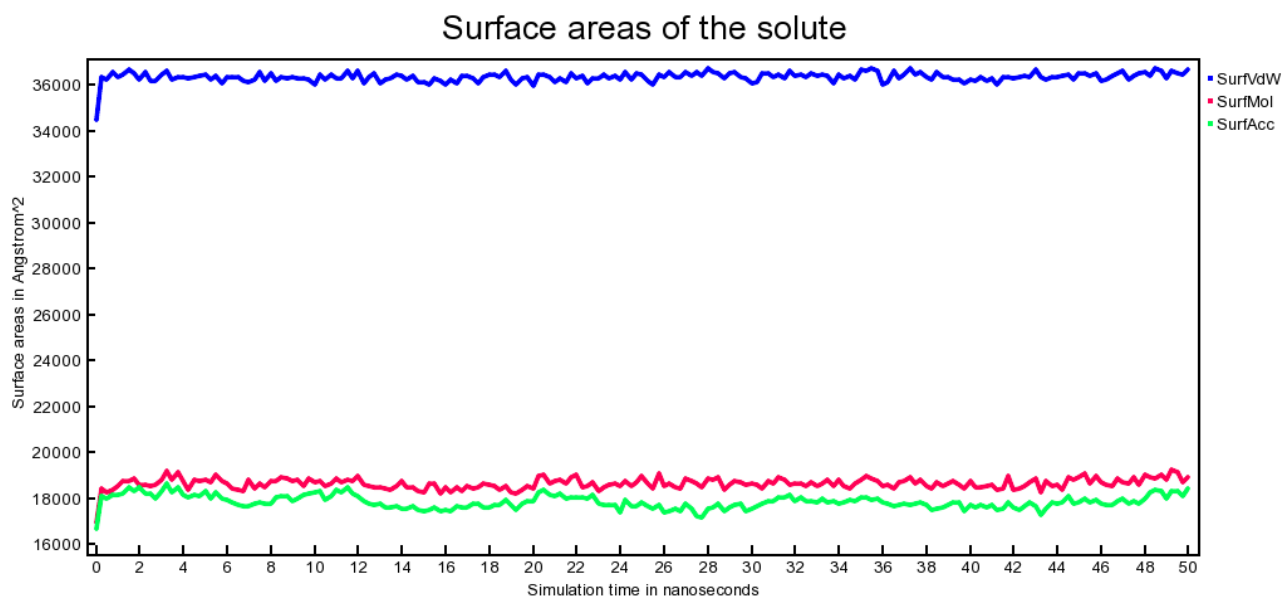

**Figure S21.** Surface areas of the solute [vertical axis] as a function of simulation time [horizontal axis], obtained with the command "SurfObj Solute".

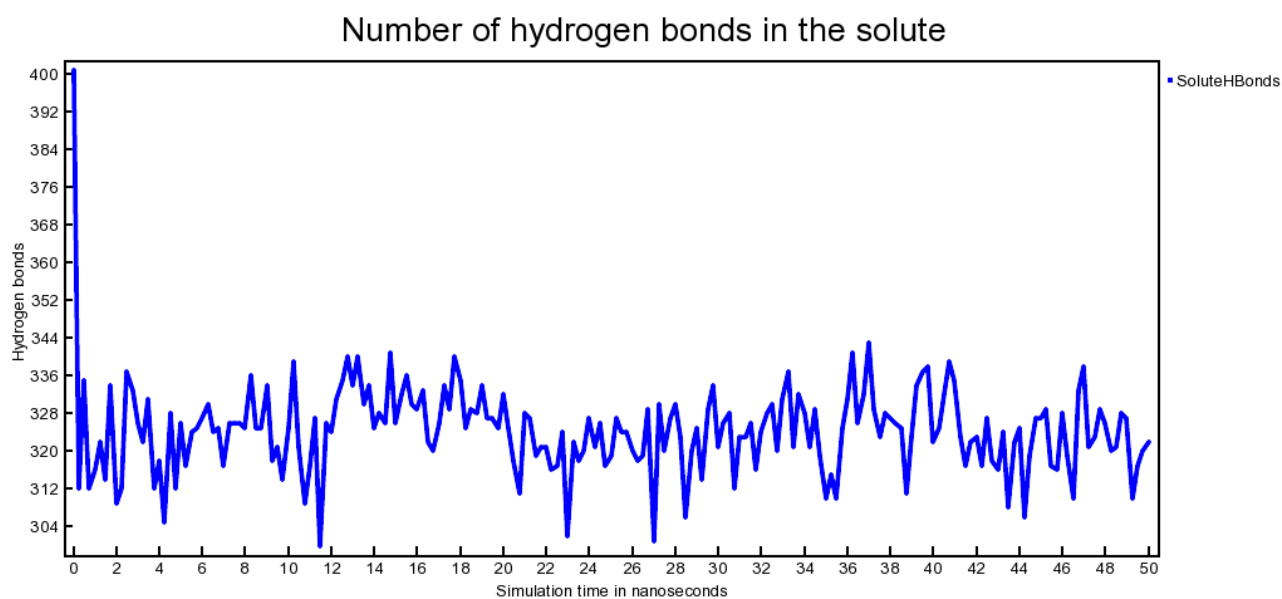

**Figure S22.** Number of hydrogen bonds in the solute [vertical axis] as a function of simulation time [horizontal axis].

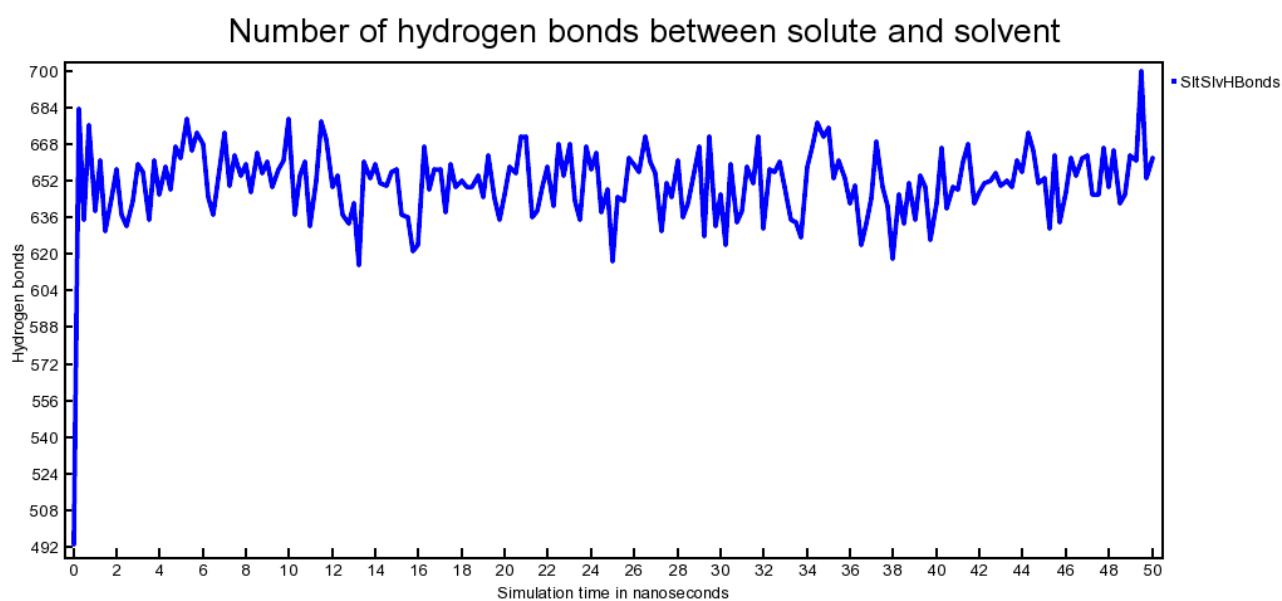

**Figure S23.** Number of hydrogen bonds between solute and solvent [vertical axis] as a function of simulation time [horizontal axis].

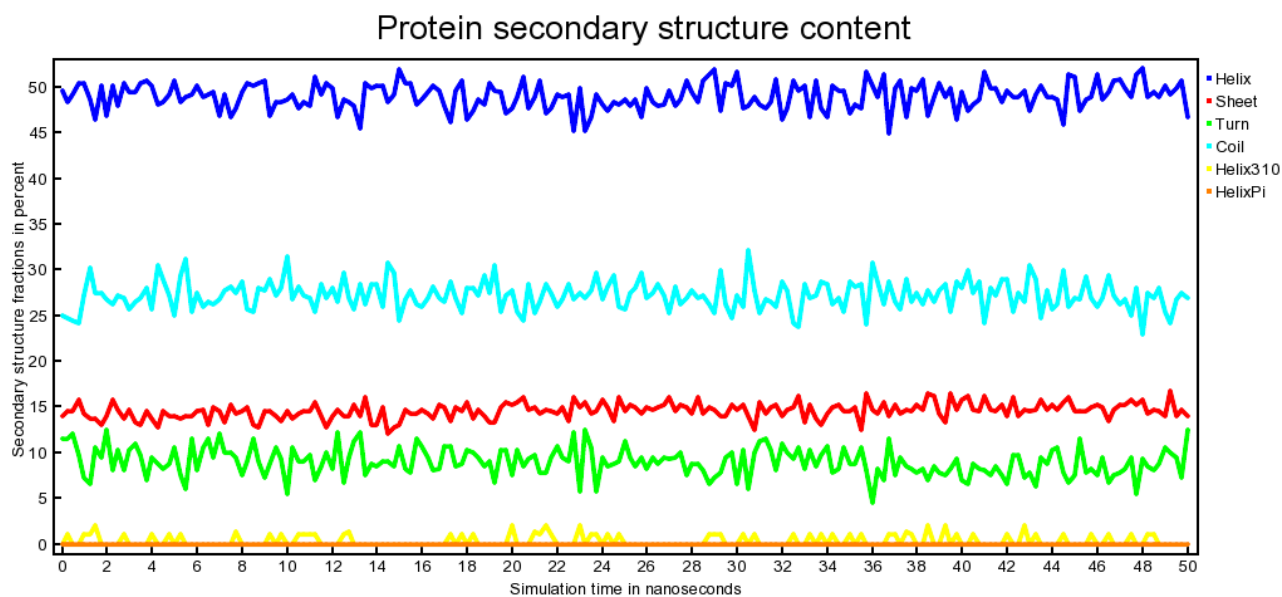

**Figure S24.** Protein secondary structure content [vertical axis] as a function of simulation time [horizontal axis], obtained with the command "SecStr". Note: Graph HelixPi has all zero values.

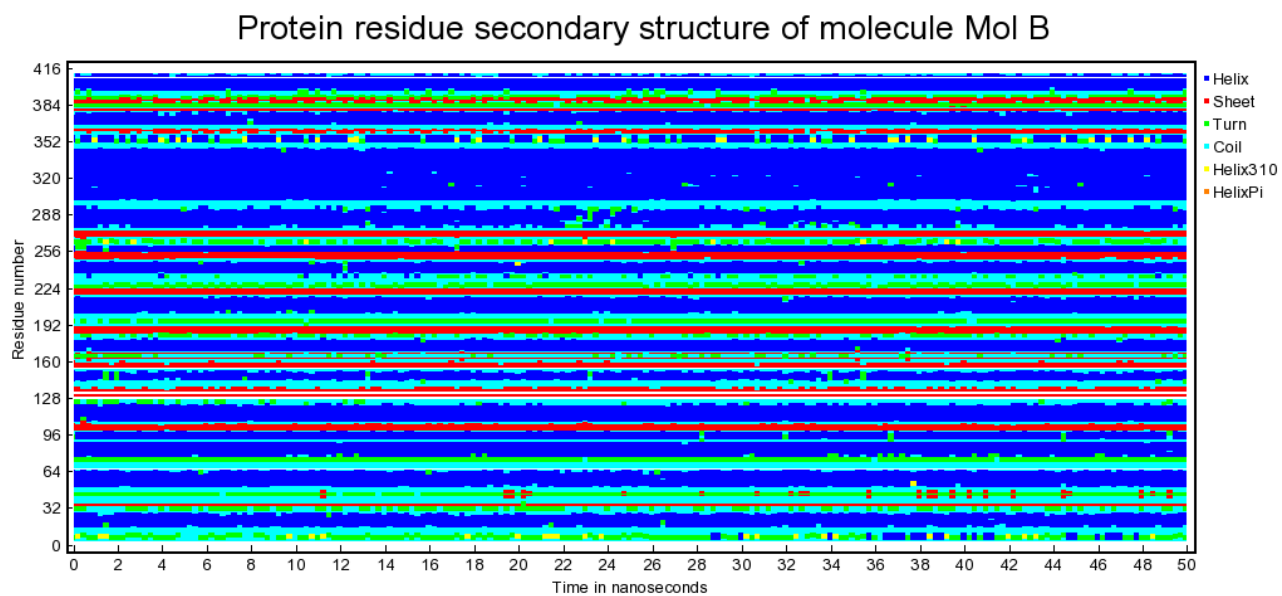

**Figure S25.** Protein residue secondary structure type [vertical axis] as a function of simulation time [horizontal axis].

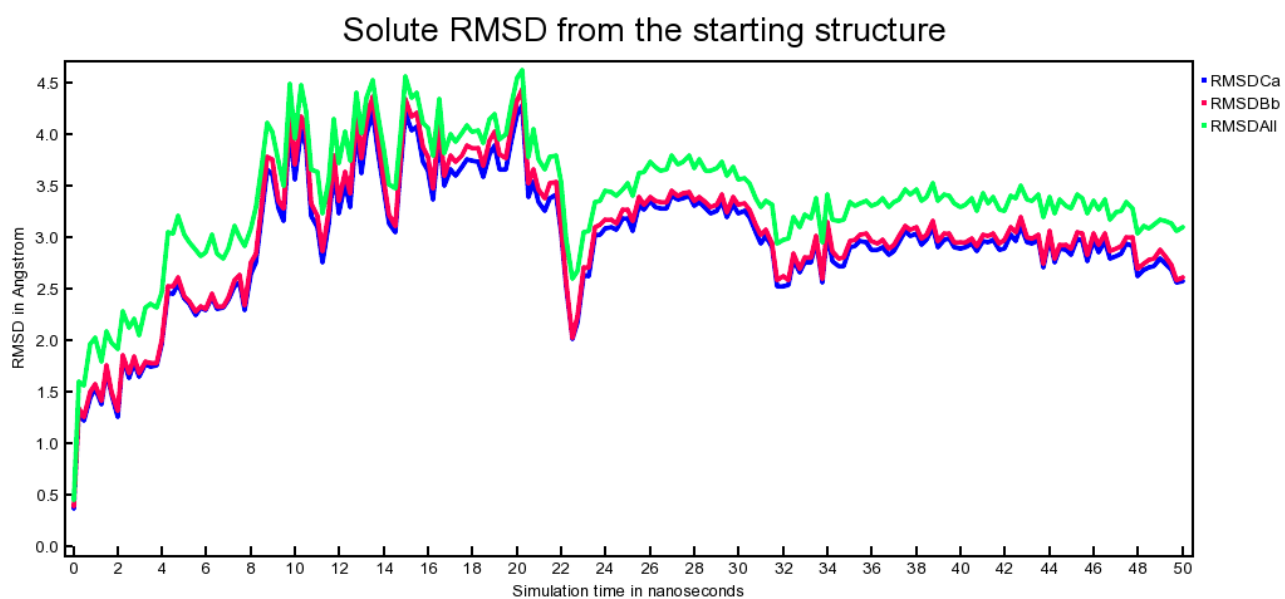

**Figure S26.** Solute RMSD from the starting structure [vertical axis] as a function of simulation time [horizontal axis].

**Figure S27.** SwissADME results for molecule **1a**.

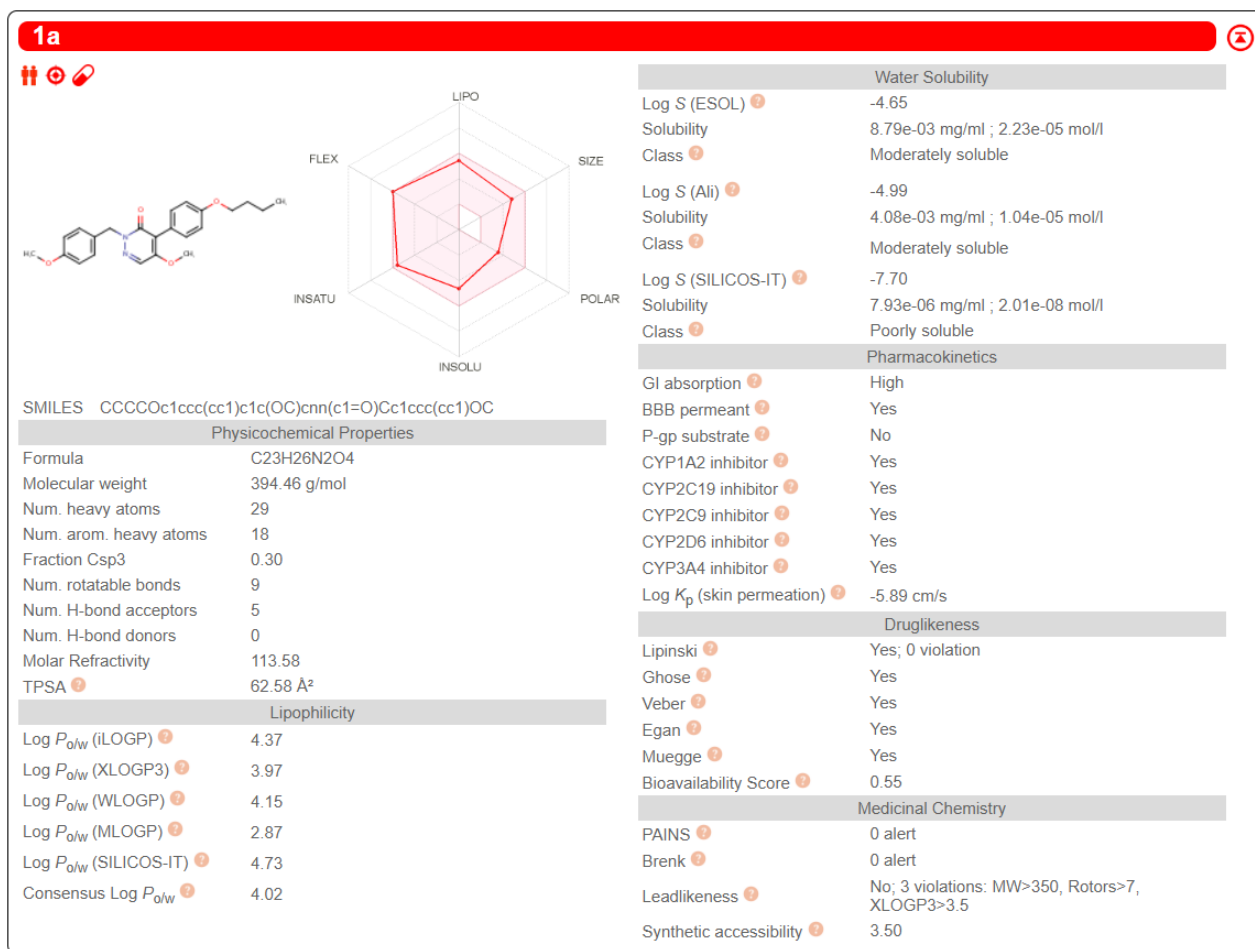

**Figure S28.** SwissADME results for molecule **2a**.

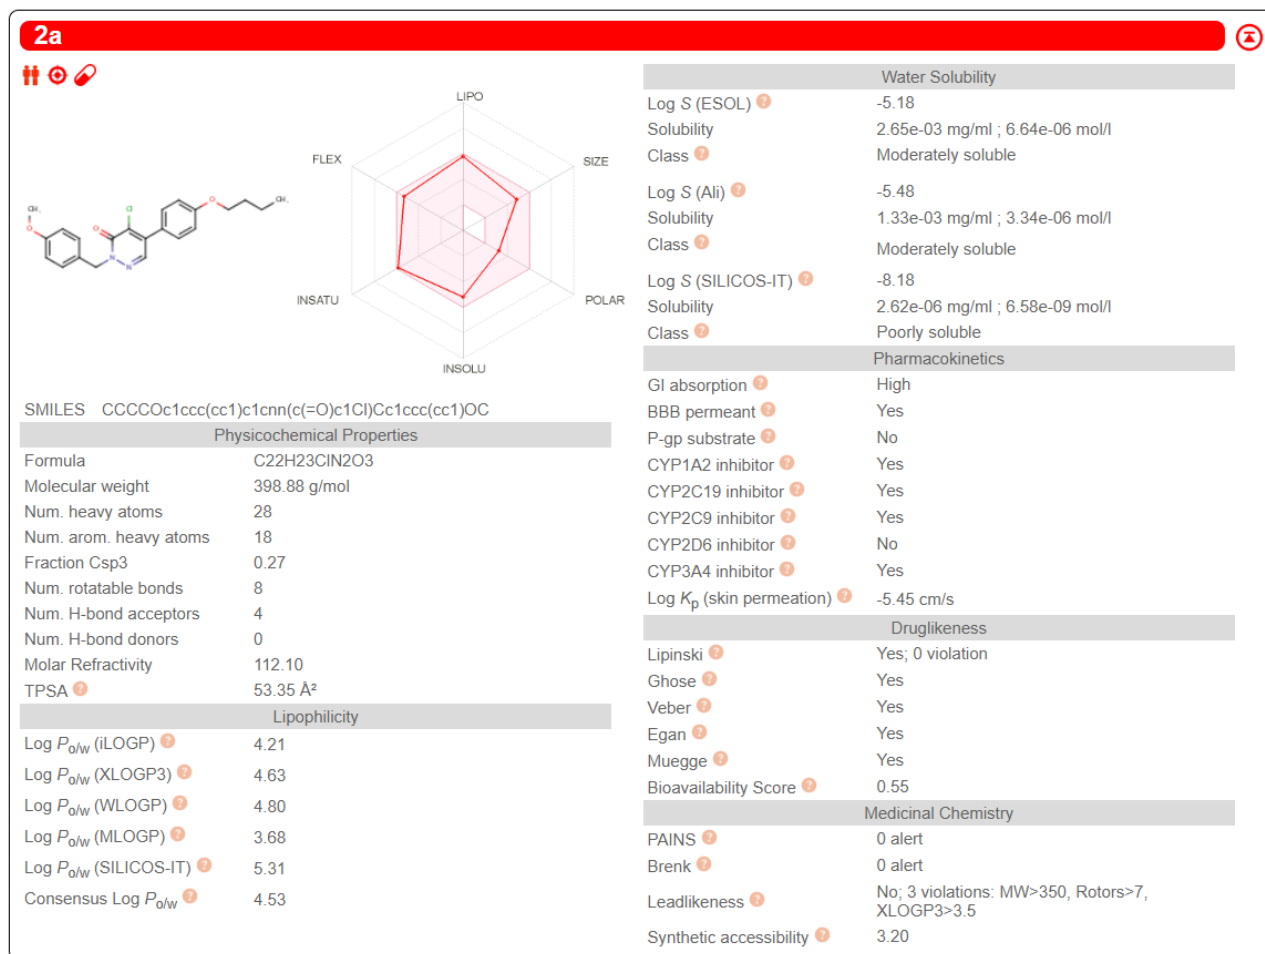

**Figure S29.** SwissADME results for molecule **3a**.

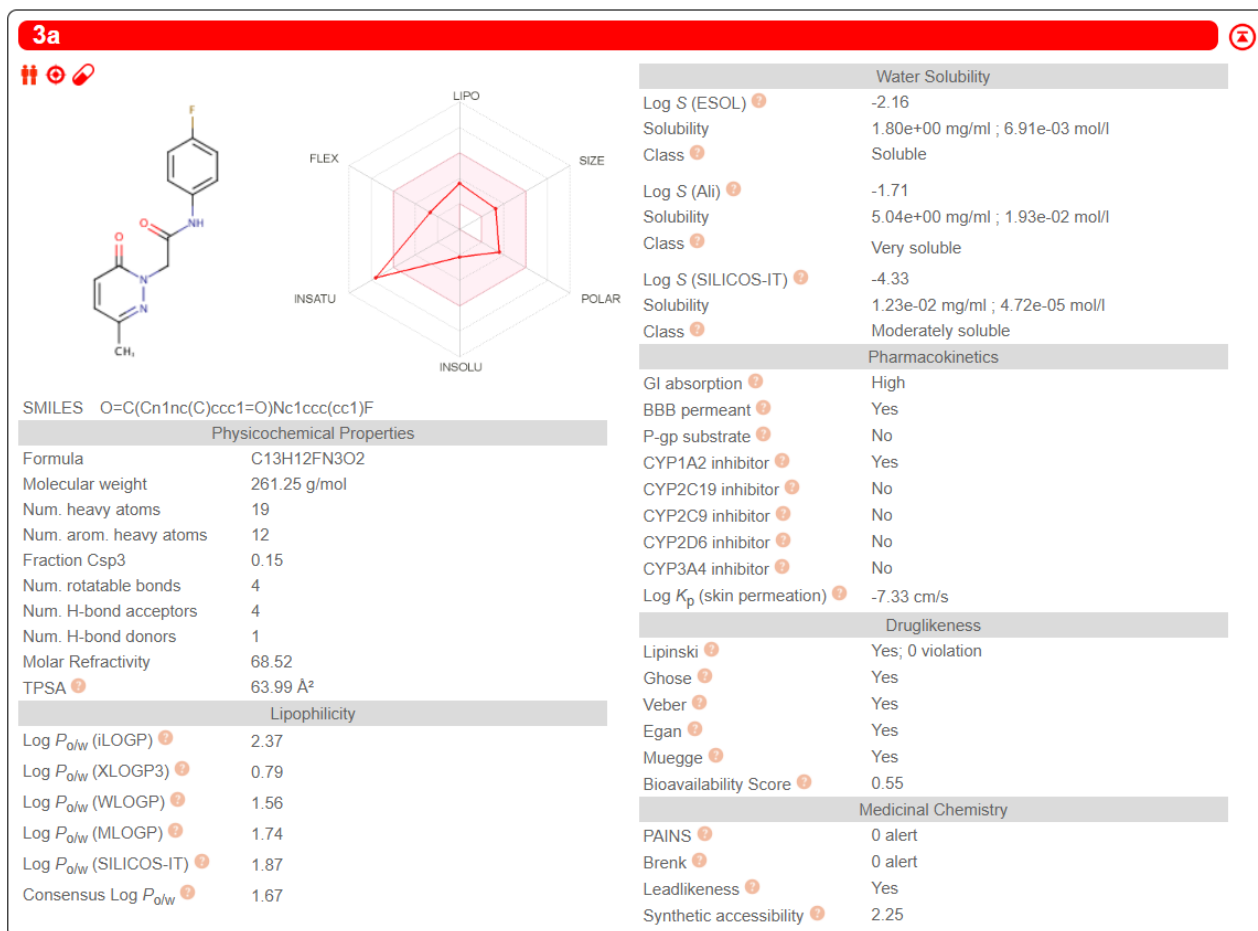



**Figure S30.** SwissADME results for molecule **5a**.

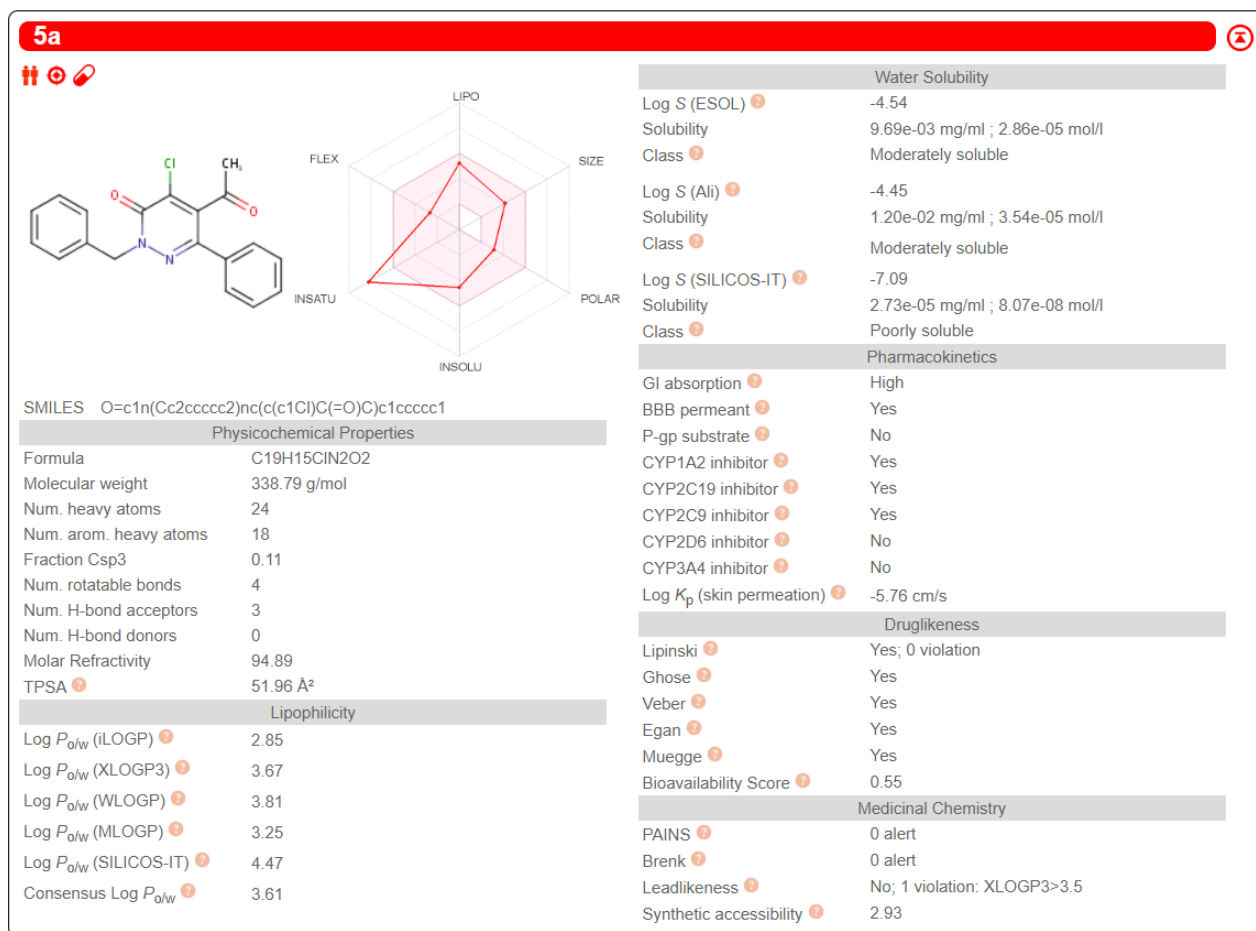

**Figure S31.** SwissADME results for molecule 7.

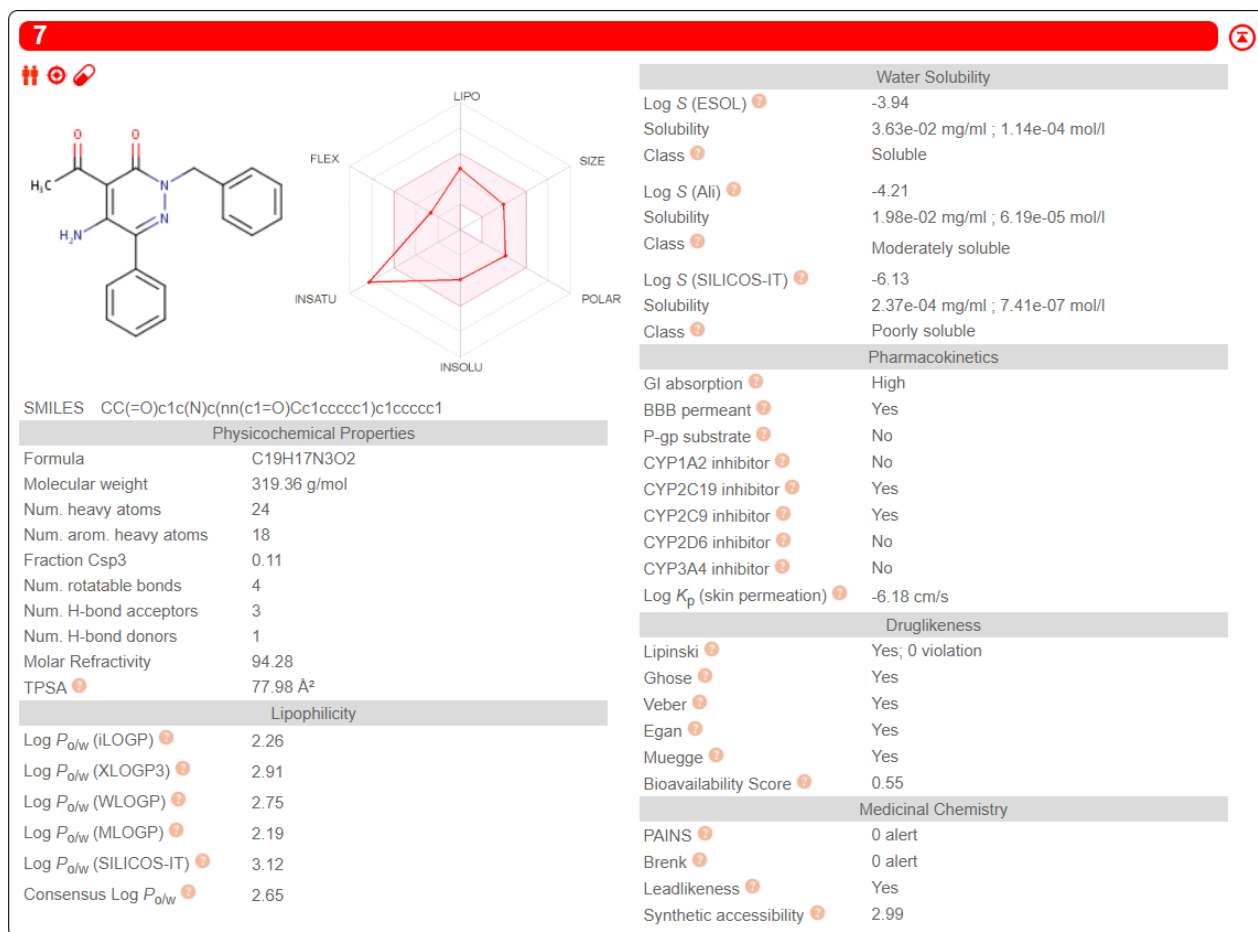

Figure S32. SwissADME results for molecule 8.

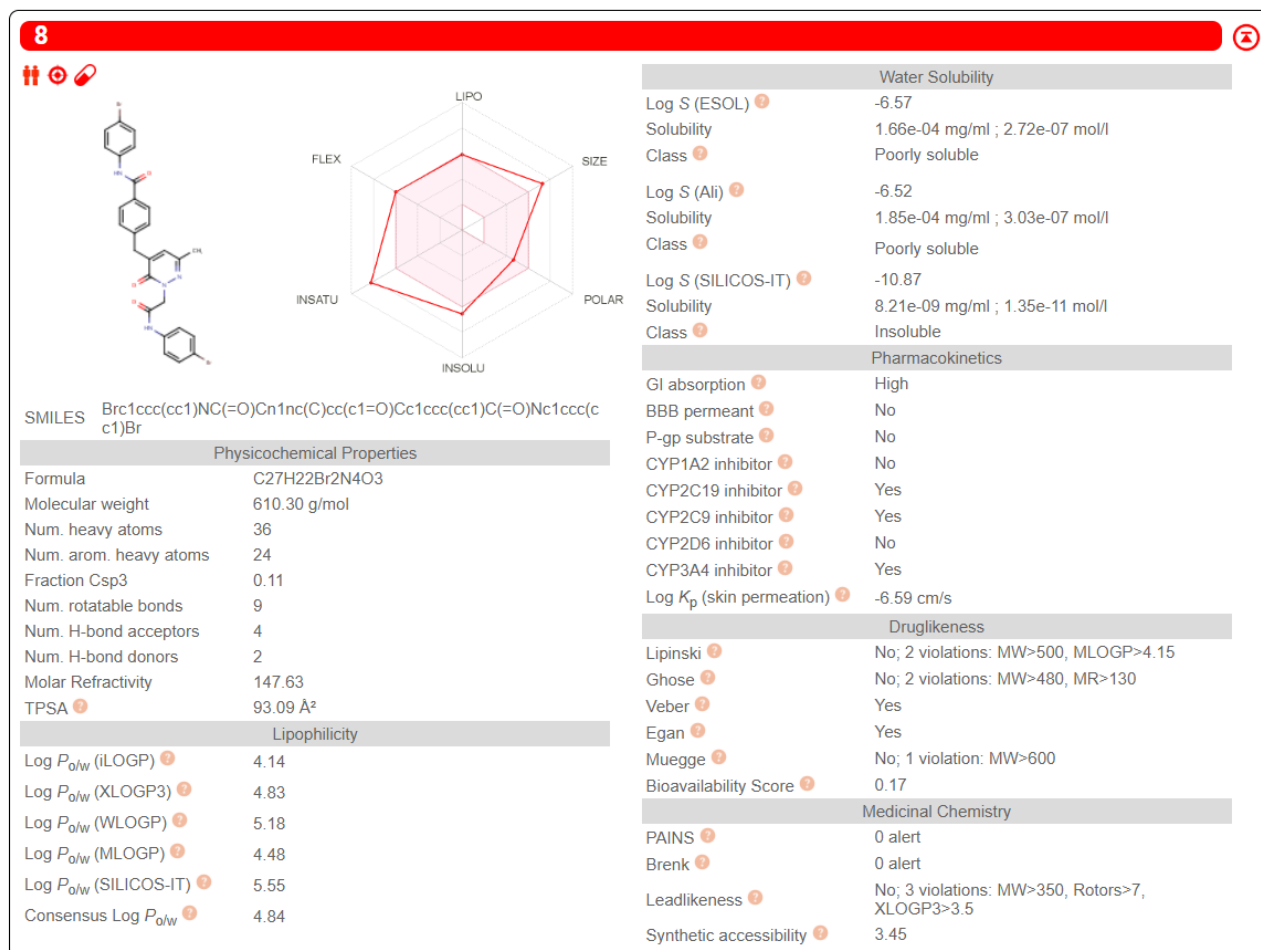

**Figure S33.** SwissADME results for molecule **9**.

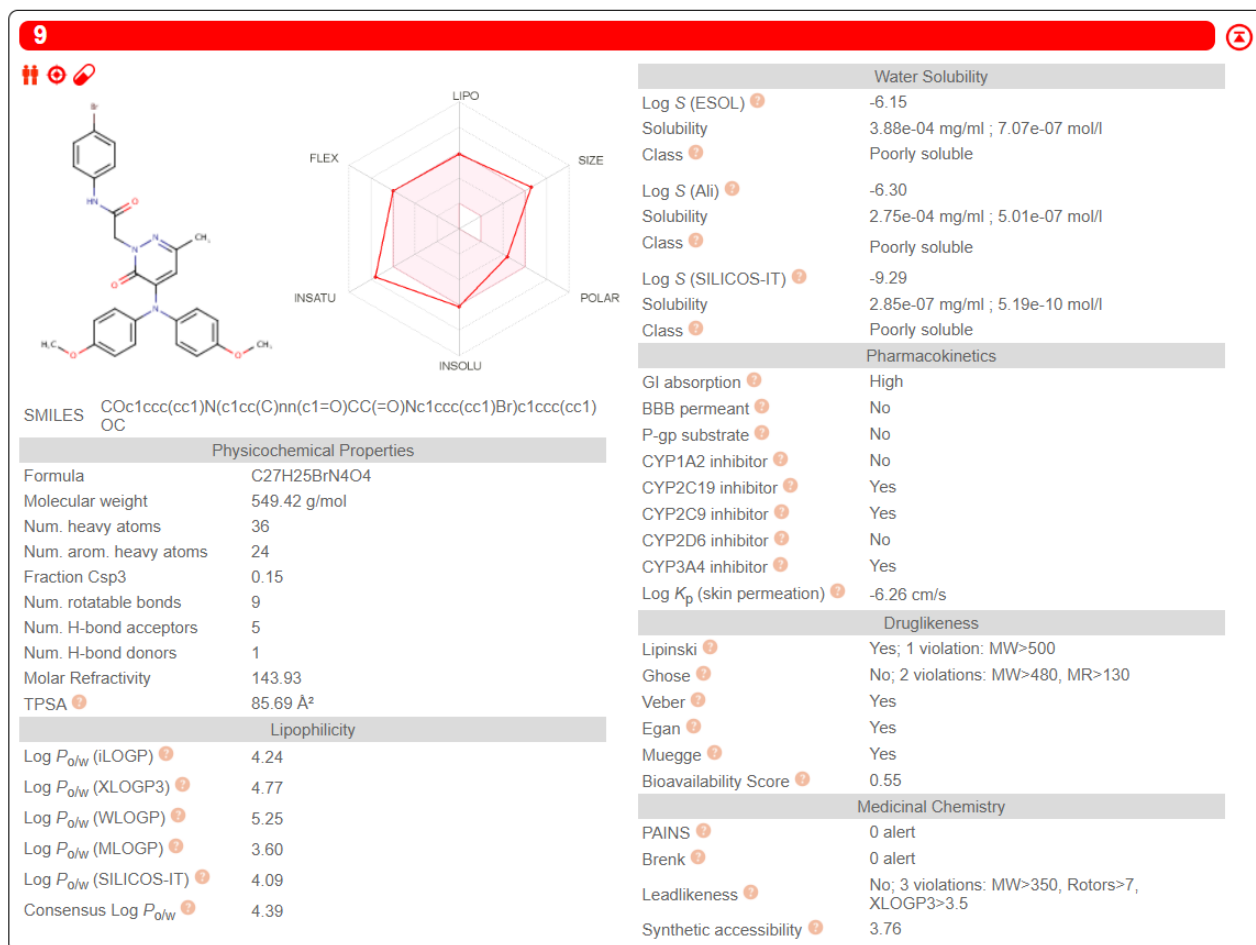

**Figure S34.** SwissADME results for molecule **10b**.

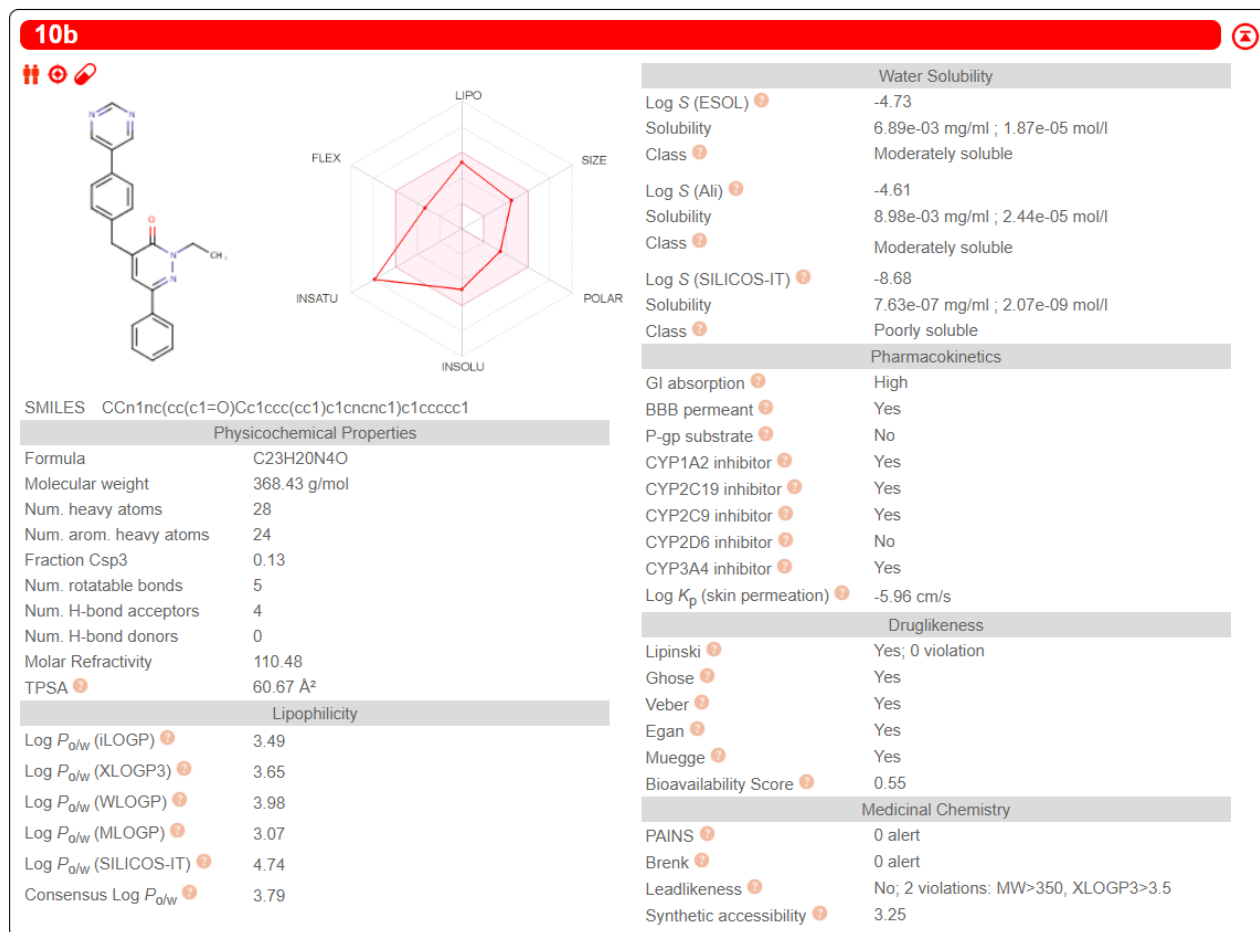

**Figure S35.** SwissADME results for molecule **10g**.

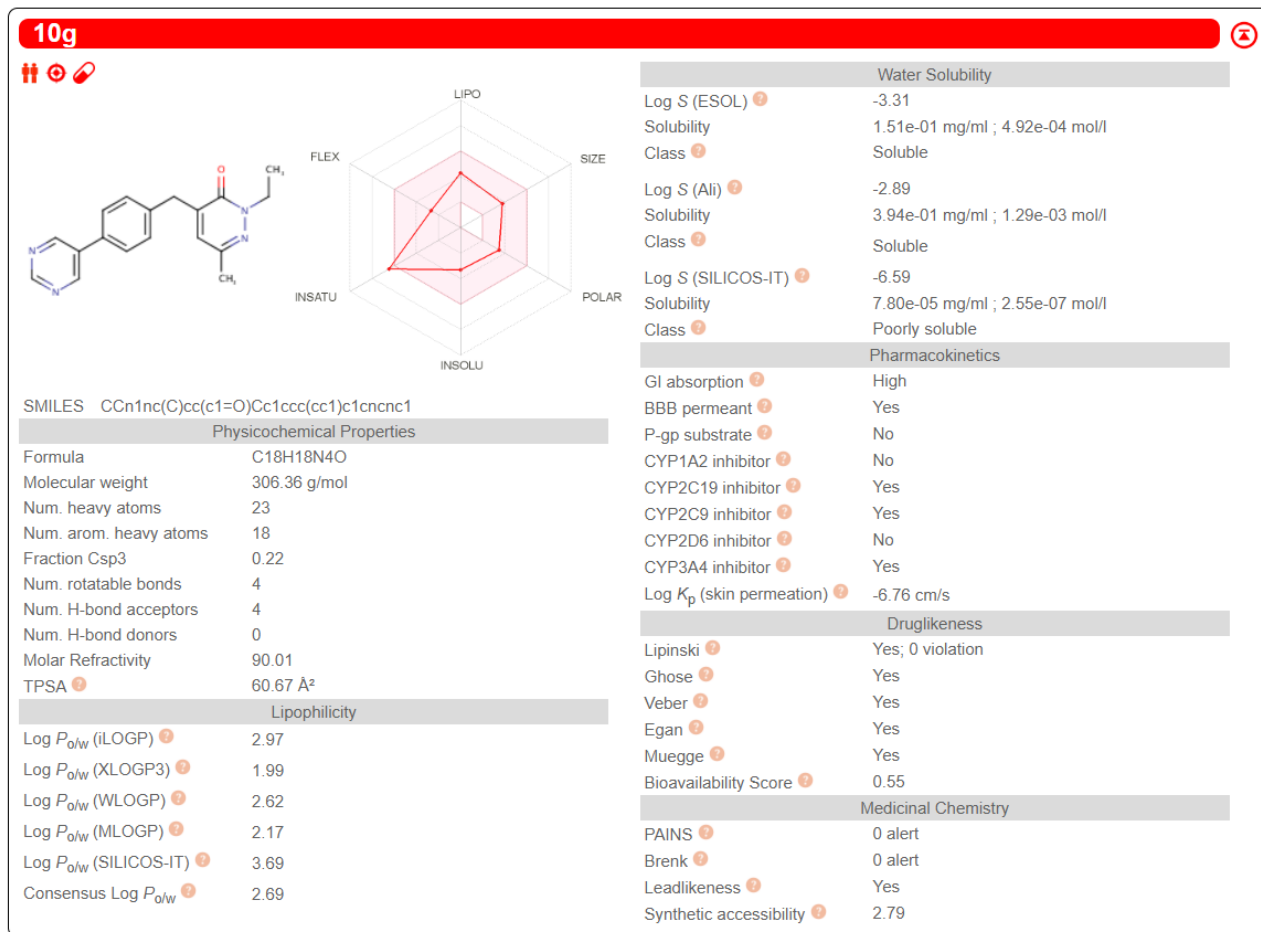

Figure S36. SwissADME results for molecule 11.

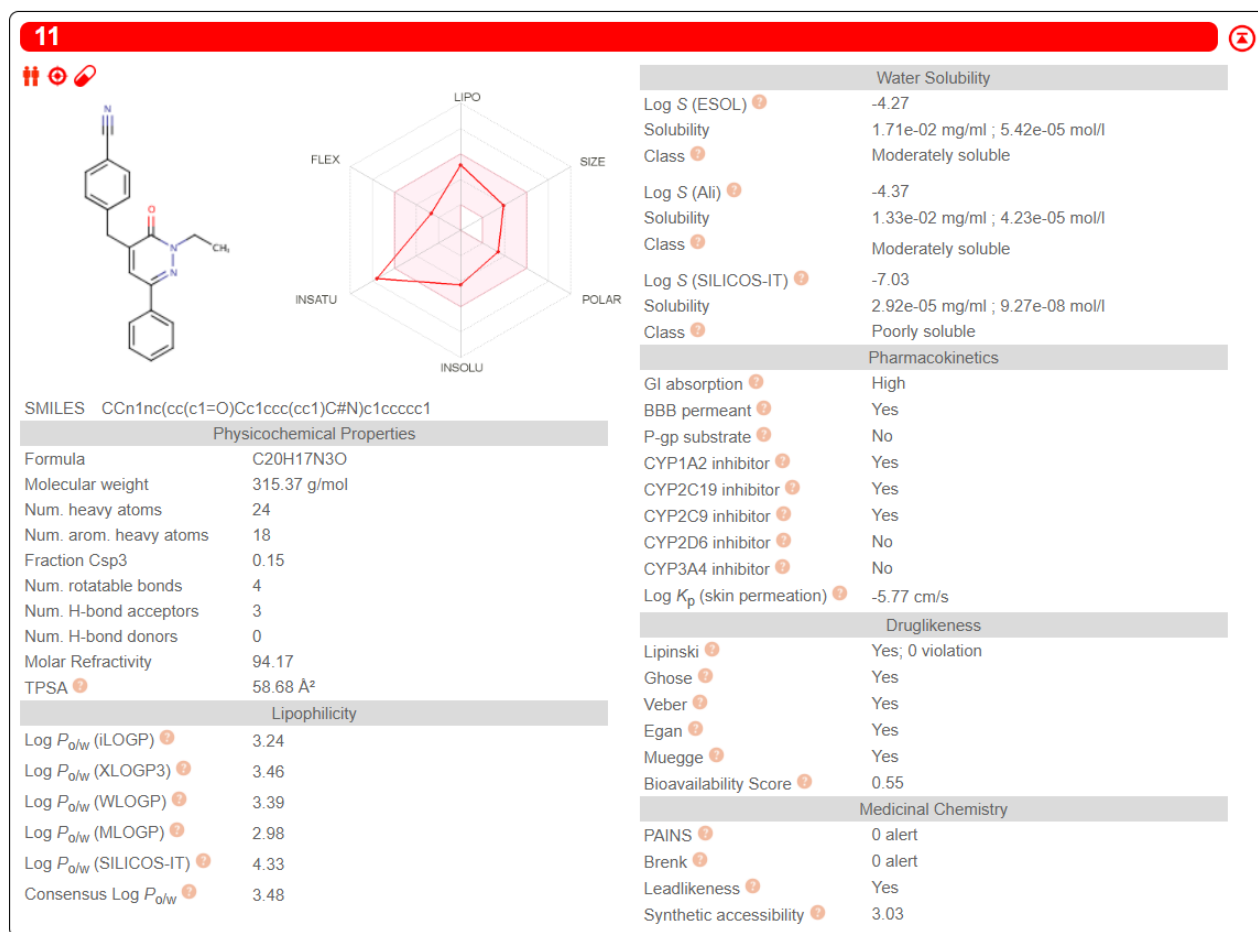

Figure S37. SwissADME results for molecule 13a.

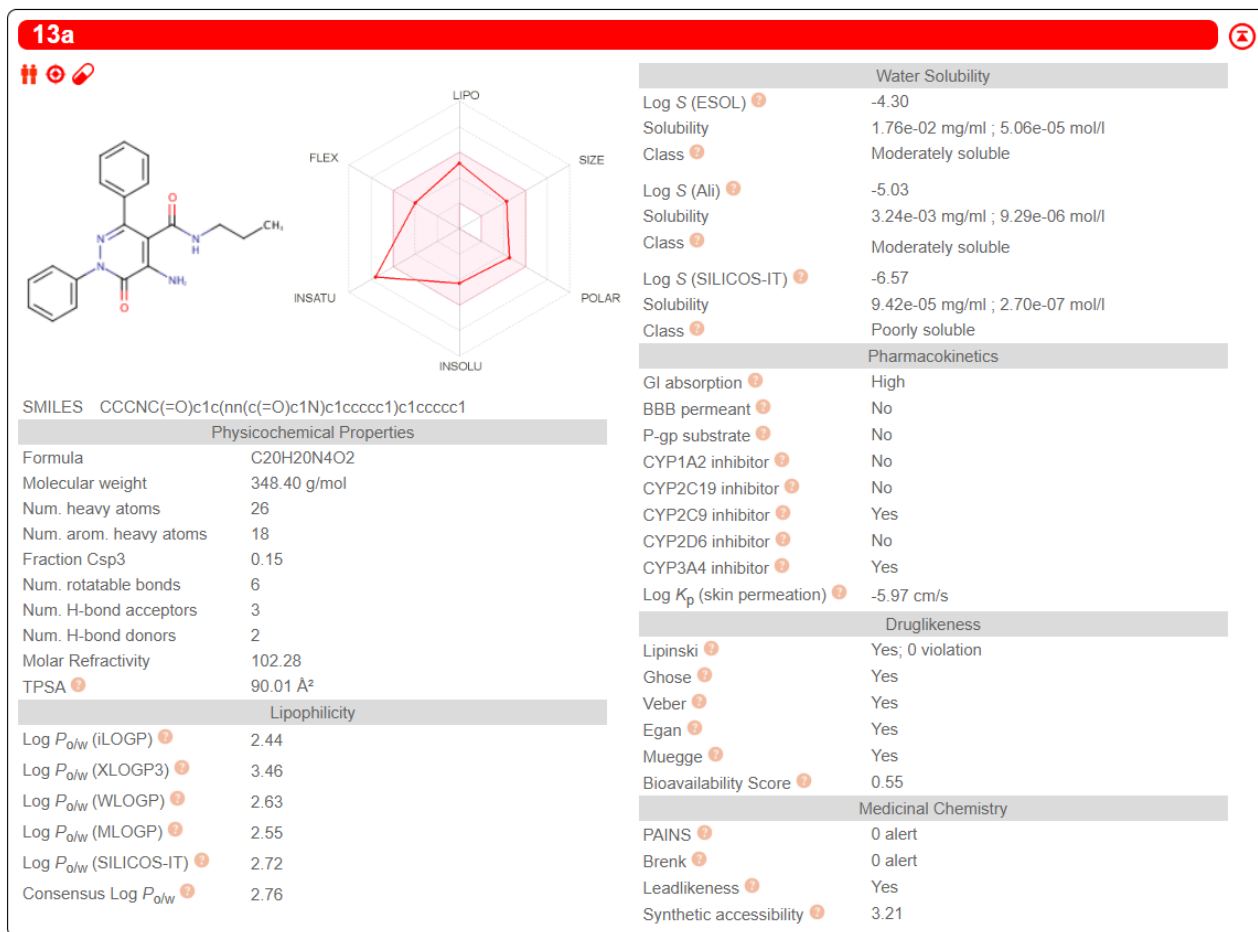



**Figure S38.** SwissADME results for molecule **15a**.

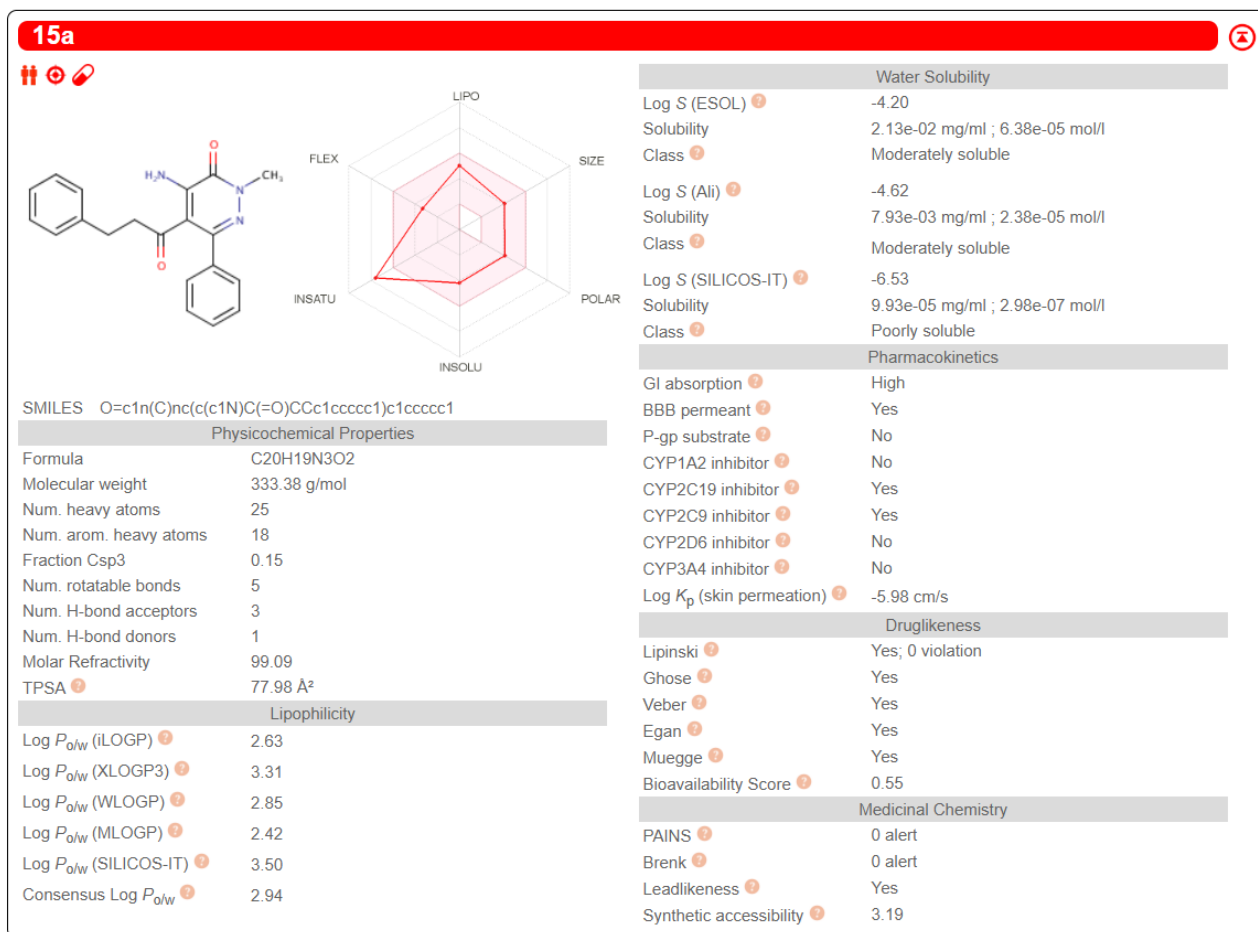

**Figure S39.** SwissADME results for molecule **15f**.

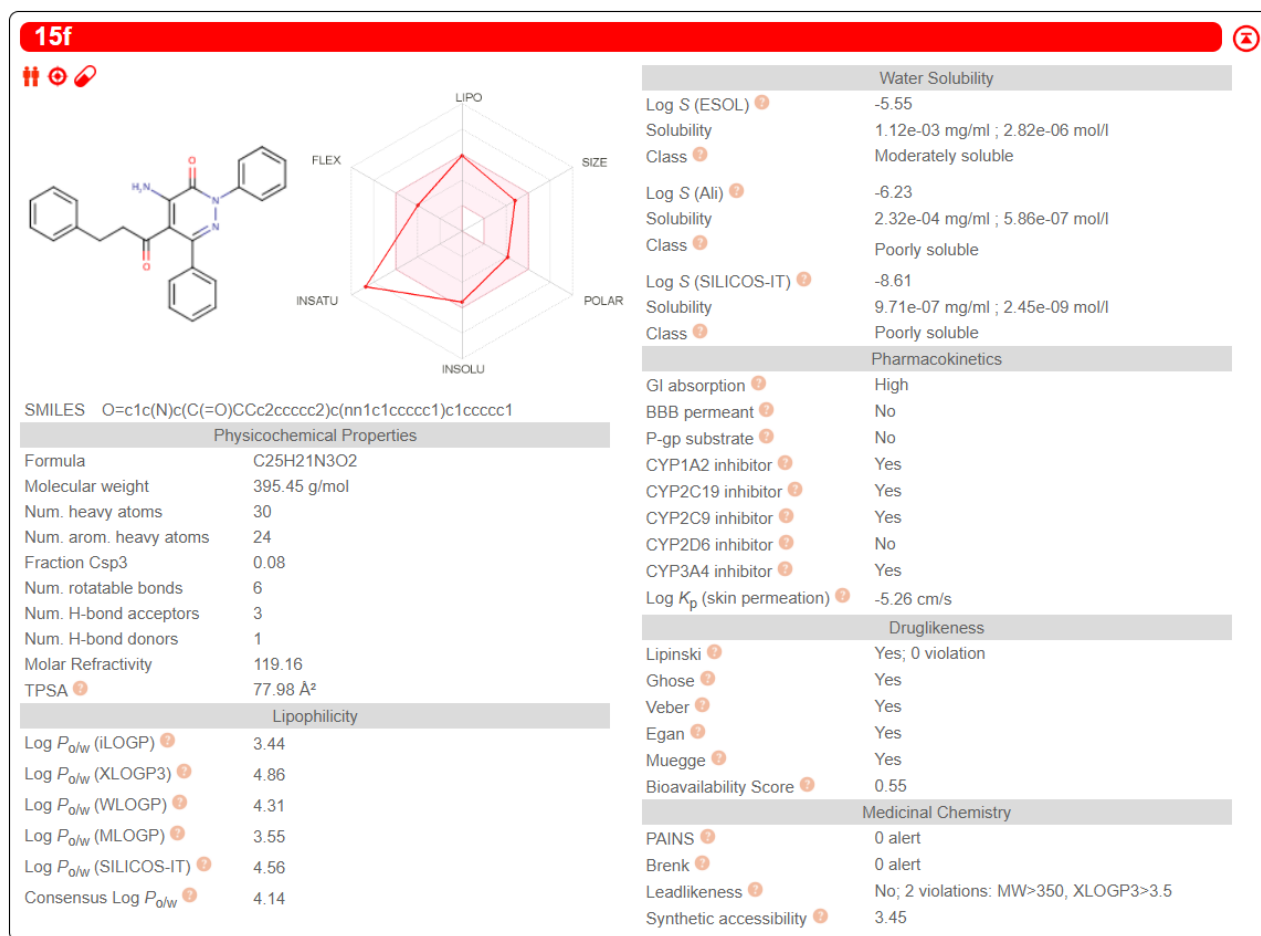

**Figure S40.** SwissADME results for molecule **17a**.

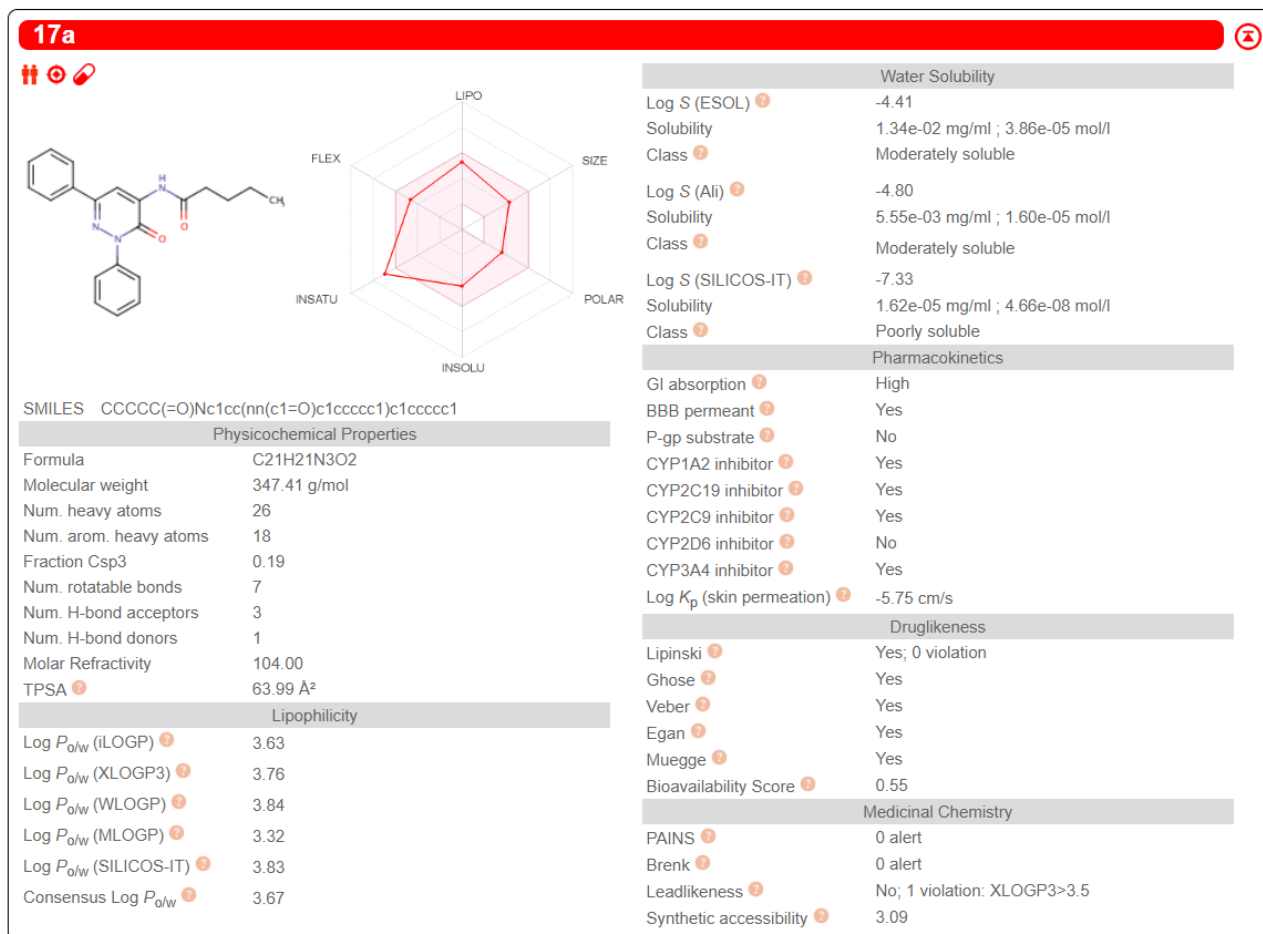

**Figure S41.** SwissADME results for molecule **20**.

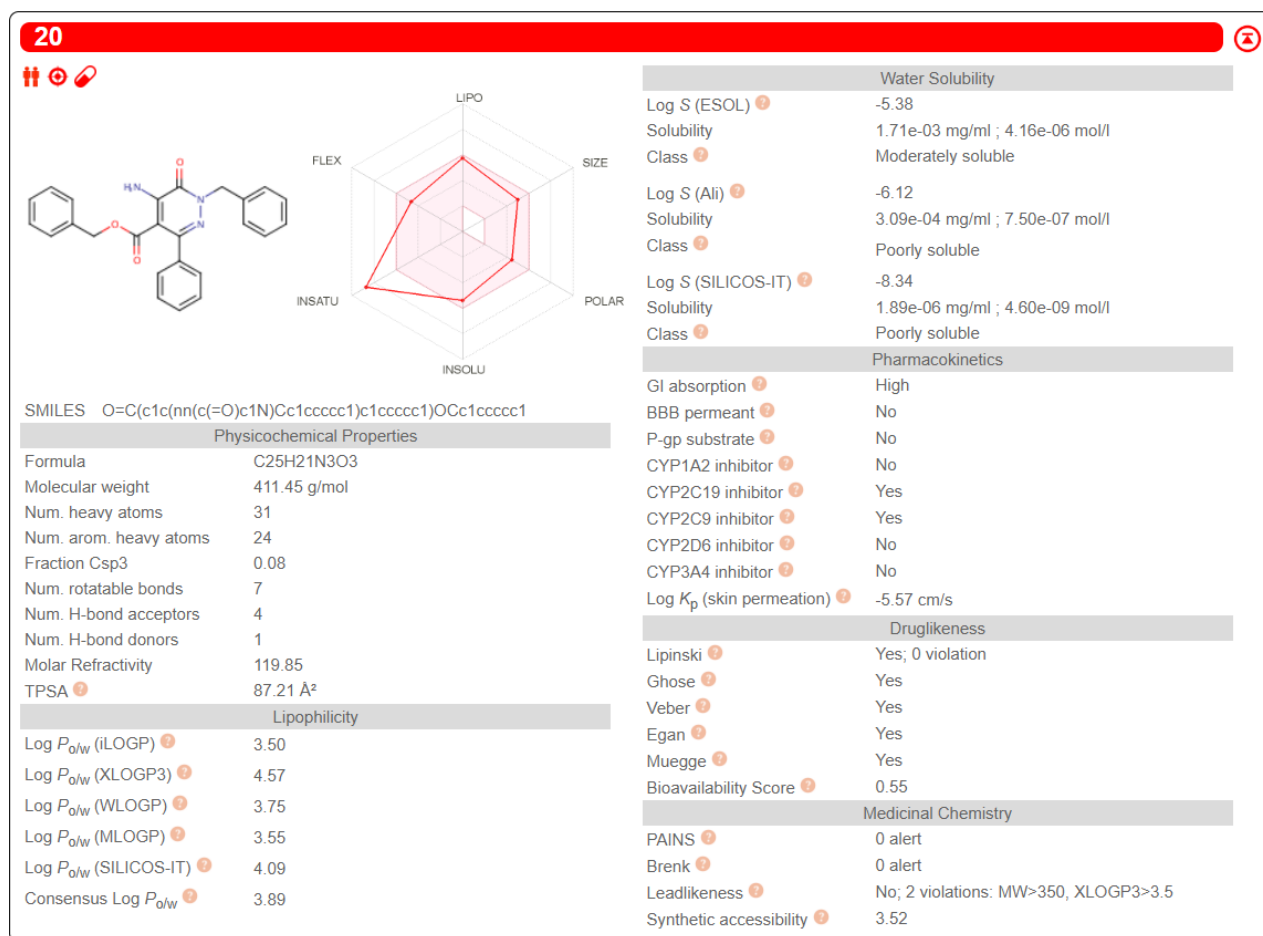

**Figure S42.** SwissADME results for molecule **21a**.

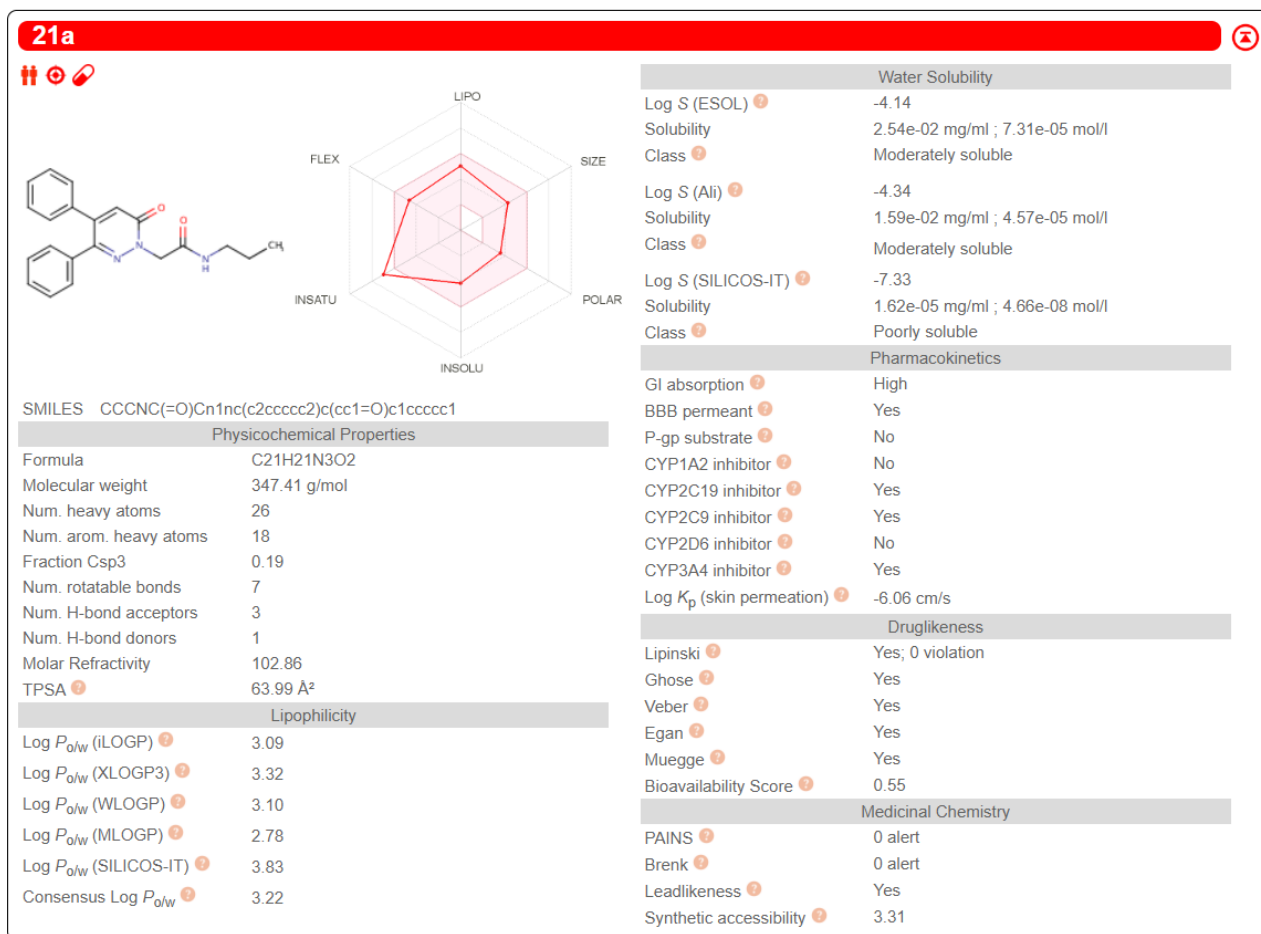

**Figure S43.** SwissADME results for molecule **21d**.

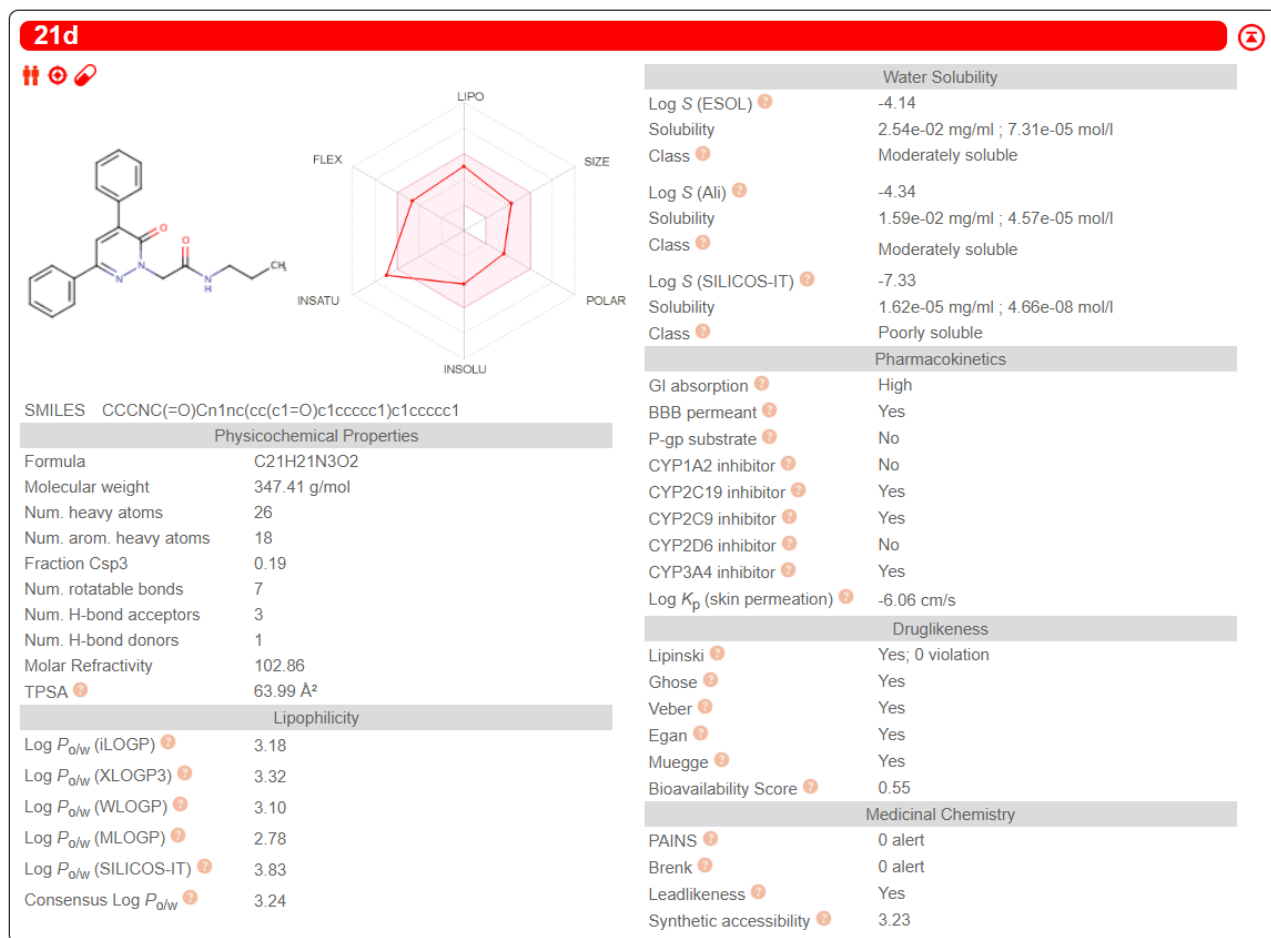

**Table S19.** pkCSM absorption results

| mol        | Water solubility | Caco2 permeability | Intestinal absorption (human) | Skin Permeability | P-glycoprotein substrate | P-glycoprotein I inhibitor | P-glycoprotein II inhibitor |
|------------|------------------|--------------------|-------------------------------|-------------------|--------------------------|----------------------------|-----------------------------|
| <b>1a</b>  | -5.127           | 1.075              | 100                           | -2.73             | No                       | Yes                        | Yes                         |
| <b>2a</b>  | -5.72            | 1.087              | 99.635                        | -2.712            | No                       | Yes                        | Yes                         |
| <b>3a</b>  | -2.944           | 1.441              | 95.475                        | -2.673            | No                       | No                         | No                          |
| <b>5a</b>  | -4.58            | 1.407              | 98.203                        | -2.701            | No                       | No                         | Yes                         |
| <b>7a</b>  | -3.761           | 0.893              | 95.774                        | -2.751            | No                       | No                         | Yes                         |
| <b>8</b>   | -5.603           | 1.01               | 87.741                        | -2.736            | Yes                      | Yes                        | Yes                         |
| <b>9</b>   | -4.621           | 1.183              | 95.913                        | -2.735            | Yes                      | Yes                        | Yes                         |
| <b>10b</b> | -5.176           | 1.028              | 100                           | -2.726            | No                       | Yes                        | Yes                         |
| <b>10g</b> | -3.335           | 1.355              | 99.99                         | -2.448            | No                       | No                         | No                          |
| <b>11</b>  | -4.673           | 1.341              | 98.693                        | -2.557            | No                       | Yes                        | Yes                         |
| <b>13a</b> | -4.269           | 1.034              | 94.435                        | -2.737            | Yes                      | Yes                        | Yes                         |
| <b>15a</b> | -4.175           | 1.199              | 97.888                        | -2.751            | No                       | Yes                        | Yes                         |
| <b>15f</b> | -4.74            | 1.029              | 96.488                        | -2.735            | Yes                      | Yes                        | Yes                         |
| <b>17a</b> | -4.442           | 1.052              | 91.796                        | -2.738            | Yes                      | Yes                        | Yes                         |
| <b>20a</b> | -4.815           | 1.17               | 96.381                        | -2.735            | Yes                      | Yes                        | Yes                         |
| <b>21a</b> | -4.844           | 0.909              | 97.177                        | -2.705            | Yes                      | Yes                        | Yes                         |
| <b>21d</b> | -4.773           | 0.856              | 95.71                         | -2.708            | Yes                      | Yes                        | Yes                         |

**Table S20.** pkCSM distribution results

| mol        | VDss (human) | Fraction unbound (human) | BBB permeability | CNS permeability |
|------------|--------------|--------------------------|------------------|------------------|
| <b>1a</b>  | 0.1          | 0.202                    | -0.451           | -2.46            |
| <b>2a</b>  | 0.242        | 0.167                    | -0.372           | -2.155           |
| <b>3a</b>  | -0.45        | 0.302                    | -0.157           | -2.902           |
| <b>5a</b>  | -0.139       | 0.121                    | 0.628            | -2.016           |
| <b>7a</b>  | -0.223       | 0.131                    | 0.001            | -2.191           |
| <b>8</b>   | -0.318       | 0.045                    | -0.452           | -1.898           |
| <b>9</b>   | -0.122       | 0.181                    | -1.149           | -2.285           |
| <b>10b</b> | 0.035        | 0.267                    | 0.395            | -2.03            |
| <b>10g</b> | -0.094       | 0.207                    | 0.388            | -2.297           |
| <b>11</b>  | -0.045       | 0.134                    | 0.084            | -1.947           |
| <b>13a</b> | -0.563       | 0.042                    | 0.14             | -2.362           |
| <b>15a</b> | -0.445       | 0.022                    | -0.119           | -2.256           |
| <b>15f</b> | -1.036       | 0.17                     | 0.09             | -1.978           |
| <b>17a</b> | -0.184       | 0.086                    | 0.166            | -2.02            |
| <b>20a</b> | -0.799       | 0.098                    | -0.013           | -2.122           |
| <b>21a</b> | -0.24        | 0.201                    | 0.263            | -2.33            |
| <b>21d</b> | -0.243       | 0.179                    | 0.336            | -2.291           |

**Table S21.** pkCSM metabolism results

| <b>mol</b> | <b>CYP2D6<br/>substrate</b> | <b>CYP3A4<br/>substrate</b> | <b>CYP1A2<br/>inhibitor</b> | <b>CYP2C19<br/>inhibitor</b> | <b>CYP2C9<br/>inhibitor</b> | <b>CYP2D6<br/>inhibitor</b> | <b>CYP3A4<br/>inhibitor</b> |
|------------|-----------------------------|-----------------------------|-----------------------------|------------------------------|-----------------------------|-----------------------------|-----------------------------|
| <b>1a</b>  | No                          | Yes                         | Yes                         | Yes                          | Yes                         | No                          | Yes                         |
| <b>2a</b>  | No                          | Yes                         | Yes                         | Yes                          | Yes                         | No                          | Yes                         |
| <b>3a</b>  | No                          | No                          | Yes                         | No                           | No                          | No                          | No                          |
| <b>5a</b>  | No                          | Yes                         | Yes                         | Yes                          | Yes                         | No                          | No                          |
| <b>7a</b>  | No                          | Yes                         | Yes                         | Yes                          | No                          | No                          | Yes                         |
| <b>8</b>   | No                          | Yes                         | No                          | Yes                          | Yes                         | No                          | Yes                         |
| <b>9</b>   | No                          | Yes                         | No                          | Yes                          | Yes                         | No                          | Yes                         |
| <b>10b</b> | No                          | Yes                         | Yes                         | Yes                          | Yes                         | No                          | Yes                         |
| <b>10g</b> | No                          | Yes                         | Yes                         | Yes                          | Yes                         | No                          | Yes                         |
| <b>11</b>  | No                          | Yes                         | Yes                         | Yes                          | Yes                         | No                          | No                          |
| <b>13a</b> | No                          | Yes                         | Yes                         | Yes                          | No                          | No                          | Yes                         |
| <b>15a</b> | No                          | Yes                         | Yes                         | Yes                          | Yes                         | No                          | Yes                         |
| <b>15f</b> | No                          | Yes                         | Yes                         | Yes                          | Yes                         | No                          | Yes                         |
| <b>17a</b> | No                          | Yes                         | Yes                         | Yes                          | Yes                         | No                          | Yes                         |
| <b>20a</b> | No                          | Yes                         | Yes                         | Yes                          | Yes                         | No                          | Yes                         |
| <b>21a</b> | No                          | Yes                         | Yes                         | Yes                          | Yes                         | No                          | Yes                         |
| <b>21d</b> | No                          | Yes                         | Yes                         | Yes                          | Yes                         | No                          | Yes                         |

**Table S22.** pkCSM excretion results

| <b>mol</b> | <b>Total<br/>Clearance</b> | <b>Renal<br/>OCT2<br/>substrate</b> |
|------------|----------------------------|-------------------------------------|
| <b>1a</b>  | 0.353                      | No                                  |
| <b>2a</b>  | 0.304                      | No                                  |
| <b>3a</b>  | 0.527                      | No                                  |
| <b>5a</b>  | 0.237                      | Yes                                 |
| <b>7a</b>  | 0.189                      | No                                  |
| <b>8</b>   | -0.79                      | No                                  |
| <b>9</b>   | -0.422                     | No                                  |
| <b>10b</b> | 1.161                      | No                                  |
| <b>10g</b> | 1.087                      | Yes                                 |
| <b>11</b>  | 0.564                      | No                                  |
| <b>13a</b> | 0.286                      | No                                  |
| <b>15a</b> | 0.331                      | No                                  |
| <b>15f</b> | 0.195                      | No                                  |
| <b>17a</b> | 0.223                      | No                                  |
| <b>20a</b> | 0.563                      | No                                  |
| <b>21a</b> | 0.558                      | No                                  |
| <b>21d</b> | 0.438                      | No                                  |



**Table S23.** pkCSM toxicity results

| mol        | AMES toxicity | Max. tolerated dose (human) | hERG I inhibitor | hERG II inhibitor | Oral Rat Acute Toxicity (LD50) | Oral Rat Chronic Toxicity (LOAEL) | Skin Sensitisation | Minnow toxicity |
|------------|---------------|-----------------------------|------------------|-------------------|--------------------------------|-----------------------------------|--------------------|-----------------|
| <b>1a</b>  | No            | 0.632                       | No               | Yes               | 2.455                          | 1.119                             | No                 | -1.537          |
| <b>2a</b>  | No            | 0.629                       | No               | Yes               | 2.411                          | 1.005                             | No                 | -2.409          |
| <b>3a</b>  | No            | 1.017                       | No               | No                | 2.301                          | 1.996                             | No                 | 1.424           |
| <b>5a</b>  | No            | 0.56                        | No               | Yes               | 2.258                          | 1.165                             | No                 | -0.459          |
| <b>7a</b>  | No            | 0.36                        | No               | Yes               | 3.057                          | 0.988                             | No                 | 0.542           |
| <b>8</b>   | No            | 0.556                       | No               | Yes               | 2.615                          | 0.727                             | No                 | -1.355          |
| <b>9</b>   | No            | 0.525                       | No               | Yes               | 3.089                          | 0.434                             | No                 | 0.162           |
| <b>10b</b> | No            | 0.759                       | No               | Yes               | 2.233                          | 0.507                             | No                 | -0.965          |
| <b>10g</b> | Yes           | -0.136                      | No               | No                | 2.064                          | 1.299                             | No                 | 1.439           |
| <b>11</b>  | No            | 0.383                       | No               | No                | 2.058                          | 1.574                             | No                 | -0.022          |
| <b>13a</b> | No            | 0.502                       | No               | Yes               | 2.91                           | 1.116                             | No                 | 0.861           |
| <b>15a</b> | No            | 0.089                       | No               | Yes               | 2.627                          | 1.227                             | No                 | -1.131          |
| <b>15f</b> | Yes           | 0.452                       | No               | Yes               | 3.137                          | 0.538                             | No                 | -2.663          |
| <b>17a</b> | Yes           | 0.205                       | No               | Yes               | 2.93                           | 0.81                              | No                 | -1.849          |
| <b>20a</b> | Yes           | 0.445                       | No               | Yes               | 3.175                          | 0.7                               | No                 | -2.595          |
| <b>21a</b> | Yes           | 0.73                        | No               | Yes               | 1.929                          | 1.268                             | No                 | -0.053          |
| <b>21d</b> | Yes           | 0.79                        | No               | Yes               | 1.919                          | 1.267                             | No                 | -0.315          |

#### 4. References

For Refs [18] and [23-34] in SI, see reference list in main manuscript.
